# Supplementary material for: Effect of Ecdysterone on the Hepatic Transcriptome and Lipid Metabolism in Lean and Obese Zucker Rats
Source: MDPI journal article supplement (doi:10.3390/ijms22105241), 2021-05-15
Supplement: s1 [file s1]

## Supplementary file 1

**Table S1** Fold change (FC) and *P*-value of all differentially expressed transcripts (FC > 1.3 or < -1.3, *P* < 0.05) between groups OC vs. LC

| Gene Symbol         | Gene Description                                                                   | FC    | <i>P</i> -value |
|---------------------|------------------------------------------------------------------------------------|-------|-----------------|
| <i>LOC681458</i>    | similar to stearyl-coenzyme A desaturase 3                                         | 44.50 | 0.0007          |
| <i>Prlr</i>         | prolactin receptor                                                                 | 25.72 | 0.0003          |
| <i>G6pd</i>         | glucose-6-phosphate dehydrogenase                                                  | 21.80 | 0.0000          |
| <i>Pnpla3</i>       | patatin-like phospholipase domain containing 3                                     | 11.36 | 0.0011          |
| <i>Scd2</i>         | stearyl-Coenzyme A desaturase 2                                                    | 10.50 | 0.0053          |
| <i>Cyp17a1</i>      | cytochrome P450, family 17, subfamily a, polypeptide 1                             | 10.16 | 0.0000          |
| <i>LOC102549542</i> | elongation of very long chain fatty acids protein 6-like                           | 10.14 | 0.0026          |
| <i>Wfdc21</i>       | WAP four-disulfide core domain 21                                                  | 9.58  | 0.0000          |
| <i>Elovl6</i>       | ELOVL fatty acid elongase 6 [Source:RGD Symbol;Acc:620585]                         | 9.52  | 0.0036          |
| <i>Elovl6</i>       | ELOVL fatty acid elongase 6                                                        | 9.49  | 0.0032          |
| <i>Gpam</i>         | glycerol-3-phosphate acyltransferase, mitochondrial                                | 8.64  | 0.0000          |
| <i>Cd36</i>         | CD36 molecule (thrombospondin receptor)                                            | 8.42  | 0.0000          |
| <i>Rtn4</i>         | reticulon 4                                                                        | 7.96  | 0.0000          |
| <i>Ces2e</i>        | carboxylesterase 2E                                                                | 7.54  | 0.0003          |
| <i>Edil3</i>        | EGF-like repeats and discoidin I-like domains 3                                    | 7.54  | 0.0000          |
| <i>Sult4a1</i>      | sulfotransferase family 4A, member 1                                               | 7.26  | 0.0003          |
| <i>Fabp4</i>        | fatty acid binding protein 4, adipocyte                                            | 6.96  | 0.0001          |
| <i>Me1</i>          | malic enzyme 1, NADP(+)-dependent, cytosolic                                       | 6.61  | 0.0006          |
| <i>Ubd</i>          | ubiquitin D                                                                        | 6.54  | 0.0005          |
| <i>Sult2a6</i>      | sulfotransferase family 2A, dehydroepiandrosterone (DHEA)-preferring, member 6     | 6.03  | 0.0000          |
| <i>Cyp2c24</i>      | cytochrome P450, family 2, subfamily c, polypeptide 24                             | 5.94  | 0.0102          |
| <i>Tor3a</i>        | torsin family 3, member A                                                          | 5.51  | 0.0006          |
| <i>Anxa5</i>        | annexin A5                                                                         | 5.41  | 0.0000          |
| <i>Enpp5</i>        | ectonucleotide pyrophosphatase/phosphodiesterase 5                                 | 5.13  | 0.0002          |
| <i>Apitd1</i>       | apoptosis-inducing, TAF9-like domain 1 (Apitd1), mRNA                              | 4.93  | 0.0001          |
| <i>Fabp5</i>        | fatty acid binding protein 5, epidermal                                            | 4.72  | 0.0001          |
| <i>Trim24</i>       | transcription intermediary factor 1-alpha [Source:RefSeq peptide;Acc:NP_001037731] | 4.72  | 0.0004          |
| <i>Efcab6</i>       | EF-hand calcium binding domain 6                                                   | 4.58  | 0.0005          |
| <i>Aldh1a7</i>      | aldehyde dehydrogenase family 1, subfamily A7                                      | 4.53  | 0.0011          |
| <i>Cidea</i>        | cell death-inducing DFFA-like effector a                                           | 4.44  | 0.0010          |
| <i>Scpep1</i>       | serine carboxypeptidase 1                                                          | 4.40  | 0.0000          |
| <i>Angptl8</i>      | angiopoietin-like 8                                                                | 4.38  | 0.0034          |
| <i>Aldh1a1</i>      | aldehyde dehydrogenase 1 family, member A1                                         | 4.35  | 0.0028          |
| <i>Ccdc141</i>      | coiled-coil domain containing 141                                                  | 4.19  | 0.0003          |
| <i>LOC100912485</i> | alcohol sulfotransferase-like                                                      | 4.13  | 0.0020          |
| <i>Fabp2</i>        | fatty acid binding protein 2, intestinal                                           | 3.92  | 0.0000          |
| <i>Sdr16c6</i>      | short chain dehydrogenase/reductase family 16C, member 6                           | 3.81  | 0.0362          |
| <i>Otub2</i>        | OTU deubiquitinase, ubiquitin aldehyde binding 2                                   | 3.78  | 0.0002          |
| <i>Sult2a2</i>      | sulfotransferase family 2A, dehydroepiandrosterone (DHEA)-preferring, member 2     | 3.77  | 0.0014          |
| <i>Fasn</i>         | fatty acid synthase                                                                | 3.64  | 0.0051          |
| <i>LOC100361492</i> | cytochrome P450, family 2, subfamily c, polypeptide 55-like                        | 3.60  | 0.0372          |
| <i>Mfsd2a</i>       | major facilitator superfamily domain containing 2A                                 | 3.48  | 0.0084          |
| <i>Gsta3</i>        | glutathione S-transferase alpha 3                                                  | 3.47  | 0.0088          |
| <i>P2rx5</i>        | purinergic receptor P2X, ligand-gated ion channel, 5                               | 3.29  | 0.0000          |
| <i>Reep6</i>        | receptor accessory protein 6                                                       | 3.28  | 0.0004          |
| <i>Apitd1</i>       | apoptosis-inducing, TAF9-like domain 1                                             | 3.27  | 0.0016          |
| <i>Dgat2</i>        | diacylglycerol O-acyltransferase 2                                                 | 3.26  | 0.0043          |

|                     |                                                                                                      |      |        |
|---------------------|------------------------------------------------------------------------------------------------------|------|--------|
| <i>Inf2</i>         | inverted formin, FH2 and WH2 domain containing [Source:MGI Symbol;Acc:MGI:1917685]                   | 3.19 | 0.0004 |
| <i>Hspa4l</i>       | heat shock protein 4-like                                                                            | 3.14 | 0.0034 |
| <i>Raly1</i>        | RALY RNA binding protein-like                                                                        | 3.03 | 0.0012 |
| ---                 | Protein LOC367485                                                                                    | 3.01 | 0.0308 |
| <i>Plin3</i>        | perilipin 3                                                                                          | 2.99 | 0.0000 |
| <i>Asns</i>         | asparagine synthetase (glutamine-hydrolyzing)                                                        | 2.94 | 0.0108 |
| <i>Esm1</i>         | endothelial cell-specific molecule 1                                                                 | 2.94 | 0.0044 |
| <i>Srd5a1</i>       | steroid-5-alpha-reductase, alpha polypeptide 1 (3-oxo-5 alpha-steroid delta 4-dehydrogenase alpha 1) | 2.92 | 0.0042 |
| ---                 | Protein LOC689635                                                                                    | 2.90 | 0.0368 |
| ---                 | Uncharacterized protein                                                                              | 2.90 | 0.0049 |
| <i>LOC100911413</i> | deleted in malignant brain tumors 1 protein-like                                                     | 2.88 | 0.0000 |
| <i>Hbb-b1</i>       | hemoglobin, beta adult major chain                                                                   | 2.84 | 0.0034 |
| <i>Il17rb</i>       | interleukin 17 receptor B                                                                            | 2.82 | 0.0153 |
| <i>Lgals3</i>       | lectin, galactoside-binding, soluble, 3                                                              | 2.80 | 0.0000 |
| <i>Myadm</i>        | myeloid-associated differentiation marker                                                            | 2.80 | 0.0047 |
| <i>Hbb</i>          | hemoglobin, beta                                                                                     | 2.79 | 0.0036 |
| <i>Filip1l</i>      | filamin A interacting protein 1-like                                                                 | 2.79 | 0.0026 |
| <i>Kcnn2</i>        | potassium channel, calcium activated intermediate/small conductance subfamily N alpha, member 2      | 2.77 | 0.0024 |
| <i>Dcakd</i>        | dephospho-CoA kinase domain containing                                                               | 2.74 | 0.0000 |
| <i>Ces2a</i>        | carboxylesterase 2A [Source:RGD Symbol;Acc:708353]                                                   | 2.74 | 0.0021 |
| <i>Rgs5</i>         | regulator of G-protein signaling 5                                                                   | 2.74 | 0.0001 |
| <i>LOC100909409</i> | disks large homolog 5-like [Source:RGD Symbol;Acc:6504293]                                           | 2.73 | 0.0168 |
| <i>Aqp11</i>        | aquaporin 11                                                                                         | 2.72 | 0.0003 |
| <i>Psat1</i>        | phosphoserine aminotransferase 1                                                                     | 2.72 | 0.0003 |
| <i>Hebp2</i>        | heme binding protein 2                                                                               | 2.72 | 0.0010 |
| <i>LOC100365047</i> | scavenger receptor class B member 2-like                                                             | 2.71 | 0.0032 |
| <i>Sri</i>          | sorcin                                                                                               | 2.69 | 0.0002 |
| <i>Adh4</i>         | alcohol dehydrogenase 4 (class II), pi polypeptide                                                   | 2.68 | 0.0017 |
| <i>LOC100912165</i> | rho guanine nucleotide exchange factor 9-like                                                        | 2.65 | 0.0000 |
| <i>Casp4</i>        | caspase 4, apoptosis-related cysteine peptidase                                                      | 2.64 | 0.0028 |
| <i>Acss2</i>        | acyl-CoA synthetase short-chain family member 2                                                      | 2.62 | 0.0095 |
| <i>Anxa2</i>        | annexin A2                                                                                           | 2.61 | 0.0011 |
| <i>RGD1565143</i>   | similar to serine/threonine kinase                                                                   | 2.61 | 0.0032 |
| <i>Ttc24</i>        | tetratricopeptide repeat domain 24 [Source:RGD Symbol;Acc:2319887]                                   | 2.59 | 0.0055 |
| <i>Nr0b2</i>        | nuclear receptor subfamily 0, group B, member 2                                                      | 2.59 | 0.0021 |
| <i>Sall1</i>        | spalt-like transcription factor 1                                                                    | 2.59 | 0.0200 |
| <i>Acsl5</i>        | acyl-CoA synthetase long-chain family member 5                                                       | 2.57 | 0.0001 |
| <i>Mmp12</i>        | matrix metalloproteinase 12                                                                          | 2.56 | 0.0316 |
| <i>Car2</i>         | carbonic anhydrase 2                                                                                 | 2.55 | 0.0001 |
| <i>RGD1306739</i>   | similar to RIKEN cDNA 1700040L02                                                                     | 2.54 | 0.0017 |
| <i>Agpat3</i>       | 1-acylglycerol-3-phosphate O-acyltransferase 3                                                       | 2.54 | 0.0000 |
| <i>Abhd1</i>        | abhydrolase domain containing 1                                                                      | 2.50 | 0.0007 |
| <i>Abcc9</i>        | ATP-binding cassette, subfamily C (CFTR/MRP), member 9                                               | 2.49 | 0.0005 |
| <i>Ethe1</i>        | ethylmalonic encephalopathy 1                                                                        | 2.48 | 0.0092 |
| <i>Hba-a1</i>       | hemoglobin alpha, adult chain 1                                                                      | 2.47 | 0.0078 |
| <i>Kank2</i>        | KN motif and ankyrin repeat domains 2                                                                | 2.47 | 0.0003 |
| <i>Ankrd39</i>      | ankyrin repeat domain 39                                                                             | 2.46 | 0.0000 |
| <i>Agtpbp1</i>      | ATP/GTP binding protein 1                                                                            | 2.45 | 0.0014 |
| <i>Ehhadh</i>       | enoyl-CoA, hydratase/3-hydroxyacyl CoA dehydrogenase                                                 | 2.43 | 0.0024 |
| <i>Abca2</i>        | ATP-binding cassette, subfamily A (ABC1), member 2                                                   | 2.40 | 0.0016 |
| <i>Smim1</i>        | small integral membrane protein 1                                                                    | 2.39 | 0.0001 |
| <i>Nudt7</i>        | nudix (nucleoside diphosphate linked moiety X)-type motif 7                                          | 2.39 | 0.0000 |
| <i>LOC685203</i>    | hypothetical protein LOC685203                                                                       | 2.39 | 0.0012 |
| <i>Mknk2</i>        | MAP kinase-interacting serine/threonine kinase 2                                                     | 2.38 | 0.0004 |
| <i>LOC689065</i>    | hypothetical protein LOC689065                                                                       | 2.38 | 0.0163 |

|                     |                                                                          |      |        |
|---------------------|--------------------------------------------------------------------------|------|--------|
| <i>Degs1</i>        | delta(4)-desaturase, sphingolipid 1                                      | 2.38 | 0.0000 |
| <i>Fdps</i>         | farnesyl diphosphate synthase                                            | 2.37 | 0.0350 |
| <i>Parvb</i>        | parvin, beta                                                             | 2.36 | 0.0062 |
| <i>Srebf1</i>       | sterol regulatory element binding transcription factor 1                 | 2.36 | 0.0003 |
| <i>Hbb-b1</i>       | hemoglobin, beta adult major chain [Source:RGD Symbol;Acc:1595848]       | 2.36 | 0.0176 |
| <i>Dlat</i>         | dihydrolipoamide S-acetyltransferase                                     | 2.36 | 0.0114 |
| <i>Adamdec1</i>     | ADAM-like, decysin 1                                                     | 2.34 | 0.0299 |
| <i>LOC100911315</i> | DNA-binding protein RFX6-like                                            | 2.33 | 0.0001 |
| <i>Ebpl</i>         | emopamil binding protein-like                                            | 2.31 | 0.0003 |
| <i>Pdlim1</i>       | PDZ and LIM domain 1                                                     | 2.31 | 0.0000 |
| <i>Pnpla5</i>       | patatin-like phospholipase domain containing 5                           | 2.31 | 0.0042 |
| <i>Orm1</i>         | orosomucoid 1                                                            | 2.31 | 0.0024 |
| <i>Pctp</i>         | phosphatidylcholine transfer protein                                     | 2.31 | 0.0008 |
| <i>Crot</i>         | carnitine O-octanoyltransferase                                          | 2.29 | 0.0318 |
| <i>Cd209b</i>       | CD209b antigen                                                           | 2.29 | 0.0000 |
| <i>Tagln</i>        | transgelin                                                               | 2.28 | 0.0050 |
| <i>Atp8a1</i>       | ATPase, aminophospholipid transporter (APLT), class I, type 8A, member 1 | 2.28 | 0.0003 |
| <i>Gypa</i>         | glycophorin A                                                            | 2.28 | 0.0009 |
| <i>Pex11a</i>       | peroxisomal biogenesis factor 11 alpha                                   | 2.27 | 0.0003 |
| <i>Topbp1</i>       | topoisomerase (DNA) II binding protein 1                                 | 2.27 | 0.0000 |
| <i>Rfx6</i>         | regulatory factor X, 6                                                   | 2.27 | 0.0000 |
| <i>Bmp7</i>         | bone morphogenetic protein 7                                             | 2.27 | 0.0452 |
| <i>Chst9</i>        | carbohydrate (N-acetylgalactosamine 4-0) sulfotransferase 9              | 2.26 | 0.0002 |
| <i>Acer2</i>        | alkaline ceramidase 2                                                    | 2.25 | 0.0000 |
| <i>Mfhas1</i>       | malignant fibrous histiocyoma amplified sequence 1                       | 2.24 | 0.0021 |
| <i>Ptk2b</i>        | protein tyrosine kinase 2 beta                                           | 2.24 | 0.0033 |
| <i>Itpk1</i>        | inositol-tetrakisphosphate 1-kinase                                      | 2.24 | 0.0011 |
| <i>Fut8</i>         | fucosyltransferase 8 (alpha (1,6) fucosyltransferase)                    | 2.24 | 0.0007 |
| <i>Tm7sf2</i>       | transmembrane 7 superfamily member 2                                     | 2.22 | 0.0200 |
| <i>Steap3</i>       | STEAP family member 3, metalloredutase                                   | 2.20 | 0.0048 |
| <i>Plin2</i>        | perilipin 2                                                              | 2.20 | 0.0140 |
| <i>Gda</i>          | guanine deaminase                                                        | 2.20 | 0.0109 |
| <i>Clybl</i>        | citrate lyase beta like                                                  | 2.19 | 0.0000 |
| <i>Lss</i>          | lanosterol synthase (2,3-oxidosqualene-lanosterol cyclase)               | 2.18 | 0.0037 |
| <i>Aco1</i>         | aconitase 1, soluble                                                     | 2.18 | 0.0003 |
| <i>Dmrt1</i>        | DMRT-like family A1                                                      | 2.17 | 0.0001 |
| <i>Src</i>          | SRC proto-oncogene, non-receptor tyrosine kinase                         | 2.17 | 0.0008 |
| <i>Cyp2c22</i>      | cytochrome P450, family 2, subfamily c, polypeptide 22                   | 2.15 | 0.0064 |
| <i>Kbtbd12</i>      | Protein LOC502859                                                        | 2.15 | 0.0442 |
| <i>Igfn1</i>        | immunoglobulin-like and fibronectin type III domain containing 1         | 2.15 | 0.0079 |
| <i>Copz2</i>        | coatomer protein complex, subunit zeta 2                                 | 2.14 | 0.0000 |
| <i>Cgref1</i>       | cell growth regulator with EF hand domain 1                              | 2.14 | 0.0002 |
| <i>Ephx2</i>        | epoxide hydrolase 2, cytoplasmic                                         | 2.14 | 0.0015 |
| <i>Med12l</i>       | mediator complex subunit 12-like                                         | 2.14 | 0.0000 |
| <i>RGD1559459</i>   | similar to Expressed sequence AI788959                                   | 2.13 | 0.0160 |
| <i>Nrp2</i>         | neuropilin 2                                                             | 2.13 | 0.0001 |
| <i>Apoa1</i>        | apolipoprotein A-I                                                       | 2.12 | 0.0005 |
| <i>Gjb2</i>         | gap junction protein, beta 2                                             | 2.11 | 0.0359 |
| <i>Slc19a3</i>      | solute carrier family 19 (thiamine transporter), member 3                | 2.10 | 0.0169 |
| <i>Adora1</i>       | adenosine A1 receptor                                                    | 2.10 | 0.0299 |
| <i>LOC100365112</i> | carboxylesterase-like                                                    | 2.09 | 0.0069 |
| <i>Ear11</i>        | eosinophil-associated, ribonuclease A family, member 11                  | 2.09 | 0.0222 |
| <i>Acaca</i>        | acetyl-CoA carboxylase alpha                                             | 2.08 | 0.0264 |
| <i>Fads2</i>        | fatty acid desaturase 2                                                  | 2.07 | 0.0000 |
| <i>Spsb4</i>        | splA/ryanodine receptor domain and SOCS box containing 4                 | 2.07 | 0.0080 |
| <i>Plbd1</i>        | phospholipase B domain containing 1                                      | 2.07 | 0.0068 |
| <i>Vnn1</i>         | vanin 1                                                                  | 2.06 | 0.0176 |
| <i>Cabp2</i>        | calcium binding protein 2                                                | 2.06 | 0.0008 |

|                     |                                                                                                                 |      |        |
|---------------------|-----------------------------------------------------------------------------------------------------------------|------|--------|
| <i>Car7</i>         | carbonic anhydrase 7                                                                                            | 2.05 | 0.0033 |
| <i>LOC100134871</i> | beta globin minor gene                                                                                          | 2.05 | 0.0144 |
| <i>Dhcr7</i>        | 7-dehydrocholesterol reductase                                                                                  | 2.05 | 0.0447 |
| <i>Hadhb</i>        | hydroxyacyl-CoA dehydrogenase/3-ketoacyl-CoA thiolase/enoyl-CoA hydratase (trifunctional protein), beta subunit | 2.04 | 0.0000 |
| <i>Lss</i>          | ENCODES a protein that exhibits lanosterol synthase activity AND INVOLVED IN cholesterol biosynthetic process   | 2.04 | 0.0227 |
| <i>Cxcl14</i>       | chemokine (C-X-C motif) ligand 14                                                                               | 2.04 | 0.0114 |
| <i>Slc39a4</i>      | solute carrier family 39 (zinc transporter), member 4                                                           | 2.04 | 0.0034 |
| <i>Zc3h12d</i>      | zinc finger CCCH type containing 12D                                                                            | 2.03 | 0.0015 |
| <i>Desi1</i>        | desumoylating isopeptidase 1                                                                                    | 2.03 | 0.0001 |
| ---                 | beta-globin (LOC689064), mRNA                                                                                   | 2.03 | 0.0068 |
| <i>Lamb3</i>        | laminin, beta 3                                                                                                 | 2.02 | 0.0014 |
| <i>Nceh1</i>        | neutral cholesterol ester hydrolase 1                                                                           | 2.02 | 0.0026 |
| <i>Acsm2a</i>       | acyl-CoA synthetase medium-chain family member 2A                                                               | 2.00 | 0.0320 |
| <i>Srpx</i>         | sushi-repeat-containing protein, X-linked                                                                       | 2.00 | 0.0000 |
| <i>Ppp1r3b</i>      | protein phosphatase 1, regulatory subunit 3B                                                                    | 2.00 | 0.0036 |
| <i>Alas2</i>        | 5-aminolevulinate synthase 2                                                                                    | 2.00 | 0.0009 |
| <i>Arhgef9</i>      | Cdc42 guanine nucleotide exchange factor (GEF) 9                                                                | 1.99 | 0.0068 |
| <i>Ptprs</i>        | protein tyrosine phosphatase, receptor type, S                                                                  | 1.99 | 0.0025 |
| <i>Limk2</i>        | LIM domain kinase 2                                                                                             | 1.99 | 0.0060 |
| <i>Irs3</i>         | insulin receptor substrate 3                                                                                    | 1.98 | 0.0153 |
| <i>St3gal3</i>      | ST3 beta-galactoside alpha-2,3-sialyltransferase 3                                                              | 1.98 | 0.0012 |
| <i>Dbi</i>          | diazepam binding inhibitor (GABA receptor modulator, acyl-CoA binding protein)                                  | 1.98 | 0.0047 |
| <i>Rarb</i>         | retinoic acid receptor, beta                                                                                    | 1.97 | 0.0064 |
| <i>Comm6</i>        | COMM domain containing 6                                                                                        | 1.97 | 0.0280 |
| <i>Mest</i>         | mesoderm specific transcript                                                                                    | 1.97 | 0.0001 |
| <i>Aldh1l2</i>      | aldehyde dehydrogenase 1 family, member L2                                                                      | 1.97 | 0.0001 |
| <i>LOC691083</i>    | hypothetical protein LOC691083                                                                                  | 1.97 | 0.0067 |
| <i>Aig1</i>         | androgen-induced 1                                                                                              | 1.96 | 0.0030 |
| <i>Ugt2b1</i>       | UDP glucuronosyltransferase 2 family, polypeptide B1                                                            | 1.96 | 0.0105 |
| <i>Trim24</i>       | tripartite motif-containing 24                                                                                  | 1.96 | 0.0259 |
| <i>LOC102550654</i> | disintegrin and metalloproteinase domain-containing protein 28-like                                             | 1.95 | 0.0320 |
| <i>Dcn</i>          | decorin                                                                                                         | 1.94 | 0.0179 |
| <i>Fbln5</i>        | fibulin 5                                                                                                       | 1.93 | 0.0015 |
| <i>Ncald</i>        | neurocalcin delta                                                                                               | 1.93 | 0.0012 |
| <i>Acly</i>         | ATP citrate lyase                                                                                               | 1.92 | 0.0042 |
| <i>Rab30</i>        | RAB30, member RAS oncogene family                                                                               | 1.92 | 0.0472 |
| <i>Nupr1</i>        | nuclear protein, transcriptional regulator, 1                                                                   | 1.91 | 0.0004 |
| <i>LOC681469</i>    | similar to stearyl-Coenzyme A desaturase 2                                                                      | 1.90 | 0.0006 |
| <i>Ces4a</i>        | carboxylesterase 4A                                                                                             | 1.90 | 0.0137 |
| <i>Jam2</i>         | junctional adhesion molecule 2                                                                                  | 1.90 | 0.0004 |
| <i>Sult1b1</i>      | sulfotransferase family, cytosolic, 1B, member 1                                                                | 1.89 | 0.0008 |
| <i>Angpt1</i>       | angiopoietin 1                                                                                                  | 1.89 | 0.0001 |
| <i>RGD1564958</i>   | PARTICIPATES IN Alzheimer disease pathway AND gluconeogenesis pathway                                           | 1.89 | 0.0012 |
| <i>Lhx2</i>         | LIM homeobox 2                                                                                                  | 1.88 | 0.0129 |
| <i>Laptm4b</i>      | lysosomal protein transmembrane 4 beta                                                                          | 1.88 | 0.0012 |
| <i>Pfkfb1</i>       | 6-phosphofructo-2-kinase/fructose-2,6-biphosphatase 1                                                           | 1.88 | 0.0403 |
| <i>Cd93</i>         | CD93 molecule                                                                                                   | 1.88 | 0.0006 |
| <i>Adssl1</i>       | Adenylosuccinate synthetase isozyme 1                                                                           | 1.87 | 0.0073 |
| <i>Slc4a1</i>       | solute carrier family 4 (anion exchanger), member 1                                                             | 1.87 | 0.0043 |
| <i>Acat2</i>        | acetyl-CoA acetyltransferase 2                                                                                  | 1.87 | 0.0026 |
| <i>Adgrg6</i>       | adhesion G protein-coupled receptor G6                                                                          | 1.87 | 0.0075 |
| <i>NUPR1</i>        | nuclear protein, transcriptional regulator, 1 (Nupr1), mRNA                                                     | 1.87 | 0.0038 |
| <i>Tmem135</i>      | transmembrane protein 135                                                                                       | 1.86 | 0.0017 |
| <i>Rassf9</i>       | Ras association (RalGDS/AF-6) domain family (N-terminal) member 9                                               | 1.86 | 0.0001 |

|                     |                                                                                                   |      |        |
|---------------------|---------------------------------------------------------------------------------------------------|------|--------|
| <i>Sparc</i>        | secreted protein, acidic, cysteine-rich (osteonectin)                                             | 1.86 | 0.0002 |
| <i>Pak1</i>         | p21 protein (Cdc42/Rac)-activated kinase 1                                                        | 1.86 | 0.0001 |
| <i>LOC102550773</i> | rho GTPase-activating protein 20-like                                                             | 1.85 | 0.0002 |
| <i>Aldh1b1</i>      | aldehyde dehydrogenase 1 family, member B1                                                        | 1.85 | 0.0037 |
| <i>Pagr8</i>        | progesterone and adiponectin receptor family member VIII                                          | 1.84 | 0.0028 |
| <i>Apmap</i>        | adipocyte plasma membrane associated protein                                                      | 1.84 | 0.0089 |
| <i>Acot2</i>        | acyl-CoA thioesterase 2                                                                           | 1.84 | 0.0281 |
| <i>LOC686437</i>    | similar to Protein C14orf105                                                                      | 1.84 | 0.0043 |
| <i>Nt5c2</i>        | 5-nucleotidase, cytosolic II                                                                      | 1.84 | 0.0004 |
| <i>Sdc1</i>         | syndecan 1                                                                                        | 1.84 | 0.0133 |
| <i>Pcdhga4</i>      | protocadherin gamma subfamily A, 4                                                                | 1.84 | 0.0055 |
| <i>Cemip</i>        | cell migration inducing protein, hyaluronan binding                                               | 1.84 | 0.0034 |
| <i>Zdhhc2</i>       | zinc finger, DHHC-type containing 2                                                               | 1.84 | 0.0061 |
| <i>Arhgap28</i>     | Rho GTPase activating protein 28                                                                  | 1.83 | 0.0279 |
| <i>Sesn3</i>        | sestrin 3                                                                                         | 1.83 | 0.0003 |
| <i>Tk1</i>          | thymidine kinase 1, soluble                                                                       | 1.83 | 0.0081 |
| <i>Hpse</i>         | heparanase                                                                                        | 1.83 | 0.0057 |
| <i>Perp</i>         | PERP, TP53 apoptosis effector                                                                     | 1.83 | 0.0005 |
| <i>Tspo</i>         | translocator protein                                                                              | 1.82 | 0.0007 |
| <i>Tfrc</i>         | transferrin receptor                                                                              | 1.81 | 0.0105 |
| <i>Hfe2</i>         | hemochromatosis type 2 (juvenile)                                                                 | 1.81 | 0.0442 |
| <i>Lrrfip1</i>      | leucine rich repeat (in FLII) interacting protein 1                                               | 1.81 | 0.0252 |
| <i>Mybl1</i>        | myeloblastosis oncogene-like 1                                                                    | 1.81 | 0.0387 |
| <i>Pex3</i>         | peroxisomal biogenesis factor 3                                                                   | 1.81 | 0.0022 |
| <i>Ugt2b10</i>      | UDP glucuronosyltransferase 2 family, polypeptide B10                                             | 1.81 | 0.0067 |
| <i>Tmem97</i>       | transmembrane protein 97                                                                          | 1.81 | 0.0020 |
| <i>Adh1</i>         | alcohol dehydrogenase 1 (class I)                                                                 | 1.81 | 0.0076 |
| <i>Adh7</i>         | alcohol dehydrogenase 7 (class IV), mu or sigma polypeptide                                       | 1.81 | 0.0299 |
| <i>Dhdds</i>        | dehydrodolichyl diphosphate synthase subunit                                                      | 1.80 | 0.0000 |
| <i>Klrg1</i>        | killer cell lectin-like receptor subfamily G, member 1                                            | 1.80 | 0.0073 |
| <i>Mki67</i>        | marker of proliferation Ki-67                                                                     | 1.80 | 0.0140 |
| <i>Bpgm</i>         | 2,3-bisphosphoglycerate mutase                                                                    | 1.80 | 0.0013 |
| <i>Rnpepl1</i>      | arginyl aminopeptidase (aminopeptidase B)-like 1                                                  | 1.80 | 0.0023 |
| <i>Tmem120a</i>     | transmembrane protein 120A                                                                        | 1.80 | 0.0071 |
| <i>Rpa1</i>         | replication protein A1                                                                            | 1.80 | 0.0010 |
| <i>Tspyl4</i>       | TSPY-like 4                                                                                       | 1.80 | 0.0182 |
| <i>Olr43</i>        | olfactory receptor 43                                                                             | 1.80 | 0.0061 |
| <i>Tmem64</i>       | transmembrane protein 64                                                                          | 1.80 | 0.0029 |
| <i>Ccdc85c</i>      | coiled-coil domain containing 85C                                                                 | 1.80 | 0.0032 |
| <i>Acta2</i>        | actin, alpha 2, smooth muscle, aorta                                                              | 1.80 | 0.0009 |
| <i>RGD1566091</i>   | INTERACTS WITH dibutyl phthalate                                                                  | 1.80 | 0.0003 |
| <i>Urad</i>         | ureidoimidazoline (2-oxo-4-hydroxy-4-carboxy-5-) decarboxylase<br>[Source:RGD Symbol;Acc:1595191] | 1.79 | 0.0025 |
| <i>LOC102553986</i> | retinoic acid receptor RXR-gamma-like                                                             | 1.79 | 0.0084 |
| <i>Abcd3</i>        | ATP-binding cassette, subfamily D (ALD), member 3                                                 | 1.78 | 0.0007 |
| <i>Cyb5b</i>        | cytochrome b5 type B (outer mitochondrial membrane)                                               | 1.78 | 0.0275 |
| <i>Amd1</i>         | adenosylmethionine decarboxylase 1                                                                | 1.78 | 0.0432 |
| <i>Acot9</i>        | acyl-CoA thioesterase 9                                                                           | 1.78 | 0.0139 |
| <i>Tmem252</i>      | transmembrane protein 252                                                                         | 1.78 | 0.0206 |
| <i>Olr1029</i>      | olfactory receptor 1029                                                                           | 1.78 | 0.0050 |
| <i>Apoa4</i>        | apolipoprotein A-IV                                                                               | 1.78 | 0.0001 |
| <i>Glt1d1</i>       | glycosyltransferase 1 domain containing 1                                                         | 1.78 | 0.0009 |
| <i>Akr1b7</i>       | aldo-keto reductase family 1, member B7                                                           | 1.77 | 0.0349 |
| <i>Mapk9</i>        | mitogen-activated protein kinase 9                                                                | 1.77 | 0.0010 |
| <i>Ccdc79</i>       | Uncharacterized protein [Source:UniProtKB/TrEMBL;Acc:F1M8N4]                                      | 1.77 | 0.0032 |
| <i>Ucp2</i>         | uncoupling protein 2 (mitochondrial, proton carrier)                                              | 1.77 | 0.0028 |
| <i>Gls</i>          | glutaminase                                                                                       | 1.77 | 0.0058 |
| <i>Unc5b</i>        | unc-5 netrin receptor B                                                                           | 1.77 | 0.0461 |

|                     |                                                                                                                                                |      |        |
|---------------------|------------------------------------------------------------------------------------------------------------------------------------------------|------|--------|
| <i>Tfpi</i>         | tissue factor pathway inhibitor (lipoprotein-associated coagulation inhibitor)                                                                 | 1.77 | 0.0007 |
| <i>RGD1560242</i>   | similar to RIKEN cDNA 1700028P14                                                                                                               | 1.76 | 0.0059 |
| <i>Edem1</i>        | Protein Edem1                                                                                                                                  | 1.76 | 0.0053 |
| <i>Pdk1</i>         | pyruvate dehydrogenase kinase, isozyme 1                                                                                                       | 1.76 | 0.0020 |
| <i>Anp32a</i>       | acidic (leucine-rich) nuclear phosphoprotein 32 family, member A                                                                               | 1.76 | 0.0003 |
| <i>Abhd6</i>        | abhydrolase domain containing 6                                                                                                                | 1.75 | 0.0453 |
| <i>Pla2g2a</i>      | phospholipase A2, group IIA (platelets, synovial fluid)                                                                                        | 1.75 | 0.0096 |
| <i>Spink3</i>       | serine peptidase inhibitor, Kazal type 3                                                                                                       | 1.75 | 0.0273 |
| <i>Eif2ak4</i>      | eukaryotic translation initiation factor 2 alpha kinase 4                                                                                      | 1.75 | 0.0014 |
| <i>Gtse1</i>        | G-2 and S-phase expressed 1                                                                                                                    | 1.75 | 0.0032 |
| <i>LOC689064</i>    | beta-globin                                                                                                                                    | 1.75 | 0.0098 |
| <i>Psmb9</i>        | proteasome subunit beta 9                                                                                                                      | 1.74 | 0.0122 |
| <i>Secisbp2l</i>    | SECIS binding protein 2-like                                                                                                                   | 1.74 | 0.0088 |
| <i>Syt12</i>        | synaptotagmin-like 2 [Source:RGD Symbol;Acc:1307647]                                                                                           | 1.74 | 0.0170 |
| <i>LOC102552996</i> | uncharacterized LOC102552996                                                                                                                   | 1.74 | 0.0213 |
| <i>Spc24</i>        | SPC24, NDC80 kinetochore complex component                                                                                                     | 1.74 | 0.0008 |
| <i>Cyb5r3</i>       | cytochrome b5 reductase 3                                                                                                                      | 1.74 | 0.0149 |
| <i>Pcdhb21</i>      | protocadherin beta 21                                                                                                                          | 1.74 | 0.0379 |
| <i>RGD1311756</i>   | similar to hypothetical protein FLJ20950                                                                                                       | 1.74 | 0.0046 |
| <i>Mdh1</i>         | malate dehydrogenase 1, NAD (soluble)                                                                                                          | 1.73 | 0.0033 |
| <i>Smoc1</i>        | SPARC related modular calcium binding 1                                                                                                        | 1.73 | 0.0014 |
| <i>Cd99l2</i>       | CD99 molecule-like 2                                                                                                                           | 1.73 | 0.0015 |
| <i>Npc2</i>         | Niemann-Pick disease, type C2                                                                                                                  | 1.73 | 0.0001 |
| <i>Acot1</i>        | acyl-CoA thioesterase 1                                                                                                                        | 1.73 | 0.0088 |
| <i>Aifm2</i>        | apoptosis-inducing factor, mitochondrion-associated 2                                                                                          | 1.72 | 0.0078 |
| <i>Inhbe</i>        | inhibin beta E                                                                                                                                 | 1.72 | 0.0103 |
| <i>Itga9</i>        | integrin, alpha 9 [Source:RGD Symbol;Acc:1311191]                                                                                              | 1.72 | 0.0159 |
| <i>Slc9a9</i>       | solute carrier family 9, subfamily A (NHE9, cation proton antiporter 9), member 9                                                              | 1.72 | 0.0072 |
| <i>RGD1562758</i>   | similar to glyceraldehyde-3-phosphate dehydrogenase [Source:RGD Symbol;Acc:1562758]                                                            | 1.72 | 0.0008 |
| <i>Thrsp</i>        | thyroid hormone responsive                                                                                                                     | 1.72 | 0.0098 |
| <i>Ablim1</i>       | actin-binding LIM protein 1 [Source:MGI Symbol;Acc:MGI:1194500]                                                                                | 1.72 | 0.0227 |
| <i>Plk1</i>         | polo-like kinase 1                                                                                                                             | 1.72 | 0.0085 |
| <i>LOC100362607</i> | nidogen 2                                                                                                                                      | 1.72 | 0.0000 |
| <i>LOC500300</i>    | similar to hypothetical protein MGC6835                                                                                                        | 1.72 | 0.0336 |
| <i>LOC498300</i>    | similar to degenerative spermatocyte homolog                                                                                                   | 1.72 | 0.0038 |
| <i>Vsig10</i>       | V-set and immunoglobulin domain containing 10                                                                                                  | 1.72 | 0.0038 |
| <i>Agfg2</i>        | ArfGAP with FG repeats 2                                                                                                                       | 1.71 | 0.0033 |
| <i>Gosr2</i>        | golgi SNAP receptor complex member 2                                                                                                           | 1.71 | 0.0001 |
| <i>LOC102552497</i> | protocadherin gamma-B6-like                                                                                                                    | 1.71 | 0.0153 |
| <i>Rdh11</i>        | retinol dehydrogenase 11 (all-trans/9-cis/11-cis)                                                                                              | 1.71 | 0.0218 |
| <i>RGD1359508</i>   | similar to protein C33A12.3                                                                                                                    | 1.70 | 0.0031 |
| <i>Krt79</i>        | Protein LOC683720                                                                                                                              | 1.70 | 0.0114 |
| <i>Bche</i>         | butyrylcholinesterase                                                                                                                          | 1.70 | 0.0061 |
| <i>LOC680538</i>    | similar to Glyceraldehyde-3-phosphate dehydrogenase (GAPDH)similar to glyceraldehyde-3-phosphate dehydrogenase (phosphorylating) (EC 1.2.1.12) | 1.70 | 0.0004 |
| <i>Slc6a13</i>      | solute carrier family 6 (neurotransmitter transporter), member 13                                                                              | 1.70 | 0.0162 |
| ---                 | Uncharacterized protein                                                                                                                        | 1.70 | 0.0001 |
| <i>Clcn6</i>        | chloride channel, voltage-sensitive 6                                                                                                          | 1.69 | 0.0038 |
| <i>RGD1564854</i>   | similar to divalent cation tolerant protein CUTA                                                                                               | 1.69 | 0.0047 |
| <i>Wdr76</i>        | WD repeat domain 76                                                                                                                            | 1.69 | 0.0018 |
| <i>Aig1</i>         | androgen-induced 1 (Aig1), mRNA. Chalmel, et. al. Testis-expressed Unannotated Transcripts (TUTs)                                              | 1.69 | 0.0149 |
| <i>Galc</i>         | galactosylceramidase                                                                                                                           | 1.69 | 0.0052 |
| <i>Ube3d</i>        | ubiquitin protein ligase E3D                                                                                                                   | 1.69 | 0.0148 |
| <i>Cyp2c7</i>       | cytochrome P450, family 2, subfamily c, polypeptide 7                                                                                          | 1.69 | 0.0000 |
| <i>St6gal1</i>      | ST6 beta-galactosamide alpha-2,6-sialyltransferase 1                                                                                           | 1.69 | 0.0364 |

|                     |                                                                                                                         |      |        |
|---------------------|-------------------------------------------------------------------------------------------------------------------------|------|--------|
| <i>Tlcd2</i>        | TLC domain containing 2                                                                                                 | 1.68 | 0.0128 |
| <i>Tpm1</i>         | tropomyosin 1, alpha                                                                                                    | 1.68 | 0.0043 |
| <i>Gale</i>         | UDP-galactose-4-epimerase                                                                                               | 1.68 | 0.0148 |
| <i>LOC691807</i>    | hypothetical protein LOC691807                                                                                          | 1.68 | 0.0041 |
| <i>Ppp2r2d</i>      | protein phosphatase 2, regulatory subunit B, delta                                                                      | 1.68 | 0.0011 |
| <i>Pcdhga5</i>      | protocadherin gamma subfamily A, 5 (Pcdhga5), mRNA. Chalmel, et. al.<br>Testis-expressed Unannotated Transcripts (TUTs) | 1.68 | 0.0134 |
| <i>Pgk1</i>         | phosphoglycerate kinase 1                                                                                               | 1.68 | 0.0175 |
| <i>Ptgis</i>        | prostaglandin I2 (prostacyclin) synthase                                                                                | 1.68 | 0.0149 |
| <i>Pigu</i>         | phosphatidylinositol glycan anchor biosynthesis, class U                                                                | 1.68 | 0.0087 |
| <i>LOC691988</i>    | similar to a disintegrin and metalloproteinase domain 28                                                                | 1.68 | 0.0073 |
| <i>LOC102554096</i> | guanylate-binding protein 6-like                                                                                        | 1.68 | 0.0470 |
| <i>Cux2</i>         | cut-like homeobox 2                                                                                                     | 1.67 | 0.0084 |
| <i>Ceacam20</i>     | carcinoembryonic antigen-related cell adhesion molecule 20                                                              | 1.67 | 0.0197 |
| <i>Col4a1</i>       | collagen, type IV, alpha 1                                                                                              | 1.67 | 0.0004 |
| <i>Fbxo3</i>        | F-box protein 3                                                                                                         | 1.67 | 0.0017 |
| <i>Acadl</i>        | acyl-CoA dehydrogenase, long chain                                                                                      | 1.67 | 0.0000 |
| <i>Tmsb10</i>       | thymosin, beta 10                                                                                                       | 1.67 | 0.0209 |
| <i>LOC100911848</i> | uncharacterized LOC100911848                                                                                            | 1.67 | 0.0004 |
| <i>Serpinh9</i>     | serpin peptidase inhibitor, clade B (ovalbumin), member 9                                                               | 1.66 | 0.0000 |
| <i>Fgfl</i>         | fibroblast growth factor 1 (acidic)                                                                                     | 1.66 | 0.0018 |
| <i>Adm</i>          | adrenomedullin                                                                                                          | 1.66 | 0.0002 |
| <i>Rangap1</i>      | RAN GTPase activating protein 1                                                                                         | 1.66 | 0.0016 |
| <i>Prss8</i>        | protease, serine, 8                                                                                                     | 1.66 | 0.0442 |
| <i>Rbm46</i>        | RNA binding motif protein 46                                                                                            | 1.66 | 0.0055 |
| <i>Scn8a</i>        | sodium channel, voltage gated, type VIII, alpha subunit                                                                 | 1.66 | 0.0023 |
| <i>Nsdhl</i>        | NAD(P) dependent steroid dehydrogenase-like                                                                             | 1.66 | 0.0199 |
| <i>Osbp11</i>       | oxysterol binding protein-like 11                                                                                       | 1.66 | 0.0285 |
| <i>LOC691565</i>    | hypothetical protein LOC691565                                                                                          | 1.65 | 0.0445 |
| <i>Col3a1</i>       | collagen, type III, alpha 1                                                                                             | 1.65 | 0.0009 |
| <i>Tdh</i>          | L-threonine dehydrogenase                                                                                               | 1.65 | 0.0016 |
| <i>Ces2c</i>        | carboxylesterase 2C (Ces2c), mRNA                                                                                       | 1.65 | 0.0456 |
| <i>Tmem55a</i>      | transmembrane protein 55A                                                                                               | 1.65 | 0.0013 |
| <i>Tmsb10</i>       | thymosin, beta 10 [Source:RGD Symbol;Acc:62022]                                                                         | 1.65 | 0.0225 |
| <i>Allc</i>         | allantoicase                                                                                                            | 1.65 | 0.0044 |
| <i>Slc8a3</i>       | solute carrier family 8 (sodium/calcium exchanger), member 3                                                            | 1.65 | 0.0007 |
| <i>Ccng1</i>        | cyclin G1                                                                                                               | 1.65 | 0.0069 |
| <i>Hemgn</i>        | hemogen                                                                                                                 | 1.64 | 0.0227 |
| <i>Tm6sf2</i>       | transmembrane 6 superfamily member 2                                                                                    | 1.64 | 0.0172 |
| <i>LOC102553649</i> | disks large homolog 5-like                                                                                              | 1.64 | 0.0241 |
| <i>Inpp1</i>        | inositol polyphosphate-1-phosphatase                                                                                    | 1.64 | 0.0023 |
| <i>Clec4a2</i>      | C-type lectin domain family 4, member A2                                                                                | 1.64 | 0.0005 |
| <i>RGD1311739</i>   | similar to RIKEN cDNA 1700037H04                                                                                        | 1.64 | 0.0142 |
| <i>Sacs</i>         | sacsin molecular chaperone                                                                                              | 1.64 | 0.0023 |
| <i>Calm2</i>        | calmodulin 2 [Source:RGD Symbol;Acc:2258]                                                                               | 1.64 | 0.0009 |
| <i>Ugt2a3</i>       | UDP glucuronosyltransferase 2 family, polypeptide A3                                                                    | 1.64 | 0.0196 |
| <i>Apln</i>         | apelin                                                                                                                  | 1.64 | 0.0297 |
| <i>Pcdh20</i>       | protocadherin beta 20                                                                                                   | 1.64 | 0.0007 |
| <i>RGD1564865</i>   | similar to 20-alpha-hydroxysteroid dehydrogenase                                                                        | 1.63 | 0.0316 |
| <i>Ech1</i>         | enoyl CoA hydratase 1, peroxisomal                                                                                      | 1.63 | 0.0440 |
| <i>Suox</i>         | sulfite oxidase                                                                                                         | 1.63 | 0.0046 |
| <i>Olr901</i>       | ENCODS a protein that exhibits olfactory receptor activity (inferred)                                                   | 1.63 | 0.0063 |
| <i>Bdh2</i>         | 3-hydroxybutyrate dehydrogenase, type 2                                                                                 | 1.63 | 0.0083 |
| <i>RGD1309676</i>   | similar to RIKEN cDNA 5730469M10                                                                                        | 1.63 | 0.0088 |
| <i>Fbn1</i>         | fibrillin 1                                                                                                             | 1.63 | 0.0098 |
| <i>Sc5d</i>         | sterol-C5-desaturase                                                                                                    | 1.63 | 0.0039 |
| <i>L3hpdh</i>       | L-3-hydroxyproline dehydratase (trans-)                                                                                 | 1.63 | 0.0290 |
| <i>Prl8a3</i>       | INTERACTS WITH astemizole AND bisphenol A AND C60 fullerene                                                             | 1.63 | 0.0138 |

|                     |                                                                  |      |        |
|---------------------|------------------------------------------------------------------|------|--------|
| <i>Mphosph6</i>     | M phase phosphoprotein 6                                         | 1.63 | 0.0038 |
| <i>Ldlr</i>         | low density lipoprotein receptor                                 | 1.63 | 0.0268 |
| <i>Npnt</i>         | nephronectin                                                     | 1.63 | 0.0038 |
| <i>Elovl2</i>       | ELOVL fatty acid elongase 2                                      | 1.62 | 0.0011 |
| <i>Pmvk</i>         | phosphomevalonate kinase                                         | 1.62 | 0.0256 |
| <i>Arsi</i>         | arylsulfatase family, member I                                   | 1.62 | 0.0200 |
| <i>Plcd3</i>        | phospholipase C, delta 3                                         | 1.62 | 0.0327 |
| <i>Atp6v1d</i>      | ATPase, H <sup>+</sup> transporting, lysosomal V1 subunit D      | 1.62 | 0.0014 |
| <i>Il18</i>         | interleukin 18                                                   | 1.62 | 0.0191 |
| <i>LOC102553032</i> | ellis-van Creveld syndrome protein homolog                       | 1.62 | 0.0038 |
| <i>Elovl5</i>       | ELOVL fatty acid elongase 5                                      | 1.62 | 0.0013 |
| <i>Lnpep</i>        | leucyl/cystinyl aminopeptidase                                   | 1.62 | 0.0013 |
| <i>RGD1309730</i>   | similar to RIKEN cDNA B230118H07                                 | 1.62 | 0.0014 |
| <i>LOC680097</i>    | similar to germinal histone H4 gene                              | 1.62 | 0.0126 |
| <i>Tfcp2l1</i>      | transcription factor CP2-like 1                                  | 1.62 | 0.0171 |
| <i>Reln</i>         | reelin                                                           | 1.61 | 0.0021 |
| <i>Ctnna3</i>       | catenin (cadherin associated protein), alpha 3                   | 1.61 | 0.0161 |
| <i>Cyp2c6v1</i>     | cytochrome P450, family 2, subfamily C, polypeptide 6, variant 1 | 1.61 | 0.0003 |
| <i>Adam28</i>       | ADAM metallopeptidase domain 28                                  | 1.61 | 0.0032 |
| <i>Glb1l2</i>       | galactosidase, beta 1-like 2                                     | 1.61 | 0.0217 |
| <i>Pde8b</i>        | phosphodiesterase 8B                                             | 1.61 | 0.0352 |
| <i>Olr824</i>       | olfactory receptor 824                                           | 1.61 | 0.0253 |
| <i>Ak4</i>          | adenylate kinase 4                                               | 1.61 | 0.0006 |
| <i>Eepd1</i>        | endonuclease/exonuclease/phosphatase family domain containing 1  | 1.61 | 0.0081 |
| <i>Fstl1</i>        | folliculin-like 1                                                | 1.61 | 0.0139 |
| <i>LOC102553394</i> | uncharacterized LOC102553394                                     | 1.61 | 0.0045 |
| <i>Tnfaip2</i>      | tumor necrosis factor, alpha-induced protein 2                   | 1.61 | 0.0424 |
| <i>Rab32</i>        | RAB32, member RAS oncogene family                                | 1.61 | 0.0003 |
| <i>Mttp</i>         | microsomal triglyceride transfer protein                         | 1.61 | 0.0177 |
| <i>Scd1</i>         | stearoyl-Coenzyme A desaturase 1                                 | 1.61 | 0.0055 |
| <i>Arpp19</i>       | cAMP-regulated phosphoprotein 19                                 | 1.61 | 0.0010 |
| <i>Fzd4</i>         | frizzled class receptor 4                                        | 1.61 | 0.0348 |
| <i>F2r</i>          | coagulation factor II (thrombin) receptor                        | 1.61 | 0.0001 |
| <i>Abcc1</i>        | ATP-binding cassette, subfamily C (CFTR/MRP), member 1           | 1.61 | 0.0210 |
| <i>Bmp1</i>         | bone morphogenetic protein 1                                     | 1.61 | 0.0101 |
| <i>Heg1</i>         | heart development protein with EGF-like domains 1                | 1.60 | 0.0024 |
| <i>Ppp1r14c</i>     | protein phosphatase 1, regulatory (inhibitor) subunit 14c        | 1.60 | 0.0082 |
| <i>Mrpl23</i>       | mitochondrial ribosomal protein L23                              | 1.60 | 0.0005 |
| <i>LOC691962</i>    | hypothetical protein LOC691962                                   | 1.60 | 0.0024 |
| <i>Stx2</i>         | syntaxin 2                                                       | 1.60 | 0.0475 |
| <i>Golt1a</i>       | golgi transport 1A                                               | 1.60 | 0.0145 |
| <i>Timp1</i>        | TIMP metallopeptidase inhibitor 1                                | 1.60 | 0.0245 |
| <i>Plat</i>         | plasminogen activator, tissue                                    | 1.60 | 0.0053 |
| <i>Apool</i>        | apolipoprotein O-like                                            | 1.60 | 0.0000 |
| <i>Pklr</i>         | pyruvate kinase, liver and RBC                                   | 1.60 | 0.0296 |
| <i>Calm2</i>        | calmodulin 2                                                     | 1.60 | 0.0009 |
| <i>Acaa1</i>        | acetyl-CoA acyltransferase 1A                                    | 1.59 | 0.0042 |
| <i>Alpl</i>         | alkaline phosphatase, liver/bone/kidney                          | 1.59 | 0.0405 |
| <i>Agap3</i>        | ArfGAP with GTPase domain, ankyrin repeat and PH domain 3        | 1.59 | 0.0056 |
| <i>Gpr137b</i>      | G protein-coupled receptor 137B                                  | 1.59 | 0.0144 |
| <i>Zfp90</i>        | zinc finger protein 90                                           | 1.59 | 0.0052 |
| <i>Bst2</i>         | bone marrow stromal cell antigen 2                               | 1.59 | 0.0431 |
| <i>Tlcd1</i>        | TLC domain containing 1                                          | 1.59 | 0.0400 |
| <i>Hltf</i>         | helicase-like transcription factor                               | 1.59 | 0.0049 |
| <i>Ednrb</i>        | endothelin receptor type B                                       | 1.58 | 0.0017 |
| <i>Grhl2</i>        | grainyhead-like transcription factor 2                           | 1.58 | 0.0076 |
| <i>Glr3</i>         | glutaredoxin 3                                                   | 1.58 | 0.0001 |
| <i>Ociad2</i>       | OClA domain containing 2                                         | 1.58 | 0.0146 |



|                     |                                                                                                                                         |      |        |
|---------------------|-----------------------------------------------------------------------------------------------------------------------------------------|------|--------|
| <i>Galk1</i>        | galactokinase 1                                                                                                                         | 1.58 | 0.0095 |
| <i>Rxrg</i>         | retinoid X receptor gamma                                                                                                               | 1.58 | 0.0277 |
| <i>Rbbp8</i>        | retinoblastoma binding protein 8                                                                                                        | 1.58 | 0.0031 |
| <i>G0s2</i>         | G0/G1switch 2                                                                                                                           | 1.58 | 0.0051 |
| <i>Pkp2</i>         | plakophilin 2                                                                                                                           | 1.57 | 0.0254 |
| <i>Glrx</i>         | glutaredoxin (thioltransferase)                                                                                                         | 1.57 | 0.0402 |
| <i>Frzb</i>         | frizzled-related protein                                                                                                                | 1.57 | 0.0181 |
| <i>Dlg3</i>         | discs, large homolog 3 (Drosophila)                                                                                                     | 1.57 | 0.0070 |
| <i>Mgam</i>         | maltase-glucoamylase [Source:MGI Symbol;Acc:MGI:1203495]                                                                                | 1.57 | 0.0197 |
| <i>Kri1</i>         | KRI1 homolog (S. cerevisiae)                                                                                                            | 1.57 | 0.0192 |
| <i>Anxa7</i>        | annexin A7                                                                                                                              | 1.57 | 0.0031 |
| <i>Nmt2</i>         | N-myristoyltransferase 2                                                                                                                | 1.57 | 0.0163 |
| <i>Ddit4</i>        | DNA-damage-inducible transcript 4                                                                                                       | 1.57 | 0.0116 |
| ---                 | ---                                                                                                                                     | 1.57 | 0.0116 |
| <i>Tkt</i>          | transketolase                                                                                                                           | 1.57 | 0.0133 |
| <i>Timp3</i>        | TIMP metalloproteinase inhibitor 3                                                                                                      | 1.56 | 0.0322 |
| <i>Lactb2</i>       | lactamase, beta 2                                                                                                                       | 1.56 | 0.0325 |
| <i>Ikbke</i>        | inhibitor of kappa light polypeptide gene enhancer in B-cells, kinase epsilon                                                           | 1.56 | 0.0110 |
| <i>Dll4</i>         | delta-like 4 (Drosophila)                                                                                                               | 1.56 | 0.0139 |
| <i>Sdcbp</i>        | syndecan binding protein                                                                                                                | 1.56 | 0.0000 |
| <i>Aacs</i>         | acetoacetyl-CoA synthetase                                                                                                              | 1.56 | 0.0143 |
| <i>Igfbp7</i>       | insulin-like growth factor binding protein 7                                                                                            | 1.56 | 0.0071 |
| <i>LOC100912507</i> | INTERACTS WITH 17beta-estradiol (ortholog) AND 5-azacytidine (ortholog) AND all-trans-retinoic acid (ortholog)                          | 1.56 | 0.0024 |
| <i>LOC100912223</i> | INTERACTS WITH 17beta-estradiol (ortholog) AND 5-azacytidine (ortholog) AND all-trans-retinoic acid (ortholog)                          | 1.56 | 0.0024 |
| <i>Olr1252</i>      | ENCODES a protein that exhibits olfactory receptor activity (inferred)                                                                  | 1.56 | 0.0024 |
| <i>Olr279</i>       | olfactory receptor 279                                                                                                                  | 1.56 | 0.0142 |
| <i>Tnnc2</i>        | troponin C type 2 (fast)                                                                                                                | 1.56 | 0.0001 |
| <i>Cbx3</i>         | chromobox homolog 3                                                                                                                     | 1.56 | 0.0434 |
| <i>Colec10</i>      | collectin sub-family member 10 (C-type lectin)                                                                                          | 1.56 | 0.0119 |
| <i>Brk1</i>         | BRICK1, SCAR/WAVE actin-nucleating complex subunit                                                                                      | 1.56 | 0.0249 |
| <i>Znf750</i>       | zinc finger protein 750                                                                                                                 | 1.56 | 0.0164 |
| <i>Glrx5</i>        | glutaredoxin 5                                                                                                                          | 1.56 | 0.0013 |
| <i>Vps36</i>        | vacuolar protein sorting 36 homolog (S. cerevisiae)                                                                                     | 1.56 | 0.0024 |
| <i>Rbm4</i>         | Chalmel, et. al. AceView Annotation Rbm4.gSep08 Testis-expressed Unannotated Transcripts (TUTs)                                         | 1.56 | 0.0074 |
| <i>Enpp4</i>        | ectonucleotide pyrophosphatase/phosphodiesterase 4                                                                                      | 1.56 | 0.0171 |
| <i>Pex14</i>        | peroxisomal biogenesis factor 14                                                                                                        | 1.55 | 0.0025 |
| <i>Dusp22</i>       | dual specificity phosphatase 22                                                                                                         | 1.55 | 0.0060 |
| <i>RGD1564133</i>   | INTERACTS WITH 8-anilinonaphthalene-1-sulfonic acid (ortholog) AND all-trans-retinoic acid (ortholog) AND copper(2+) sulfate (ortholog) | 1.55 | 0.0433 |
| <i>Lrig3</i>        | leucine-rich repeats and immunoglobulin-like domains 3                                                                                  | 1.55 | 0.0338 |
| <i>RGD1559683</i>   | similar to RIKEN cDNA 1700001C02                                                                                                        | 1.55 | 0.0076 |
| <i>Lrrcc1</i>       | leucine rich repeat and coiled-coil centrosomal protein 1                                                                               | 1.55 | 0.0299 |
| <i>Kifc3</i>        | kinesin family member C3                                                                                                                | 1.55 | 0.0271 |
| <i>Slc25a20</i>     | solute carrier family 25 (carnitine/acylcarnitine translocase), member 20                                                               | 1.55 | 0.0196 |
| <i>Cln6</i>         | ceroid-lipofuscinosis, neuronal 6, late infantile, variant                                                                              | 1.55 | 0.0192 |
| <i>Ube2e2</i>       | ubiquitin-conjugating enzyme E2E 2                                                                                                      | 1.55 | 0.0019 |
| <i>Tmem14c</i>      | transmembrane protein 14C                                                                                                               | 1.55 | 0.0164 |
| <i>LOC102547000</i> | rho GTPase-activating protein 20-like                                                                                                   | 1.55 | 0.0376 |
| <i>Exosc9</i>       | exosome component 9                                                                                                                     | 1.55 | 0.0003 |
| <i>Rxfp1</i>        | relaxin/insulin-like family peptide receptor 1                                                                                          | 1.55 | 0.0468 |
| <i>Tmem2</i>        | transmembrane protein 2                                                                                                                 | 1.54 | 0.0031 |
| <i>Rcn1</i>         | reticulocalbin 1, EF-hand calcium binding domain                                                                                        | 1.54 | 0.0112 |
| <i>Cdr2</i>         | cerebellar degeneration-related protein 2                                                                                               | 1.54 | 0.0012 |
| <i>Arhgap11a</i>    | Rho GTPase activating protein 11A                                                                                                       | 1.54 | 0.0228 |
| <i>Sorcs2</i>       | sortilin-related VPS10 domain containing receptor 2                                                                                     | 1.54 | 0.0294 |

|                     |                                                                            |      |        |
|---------------------|----------------------------------------------------------------------------|------|--------|
| <i>LOC102555951</i> | brain-specific angiogenesis inhibitor 1-associated protein 2-like          | 1.54 | 0.0492 |
| <i>Fam134b</i>      | family with sequence similarity 134, member B                              | 1.54 | 0.0201 |
| <i>Ppt1</i>         | palmitoyl-protein thioesterase 1                                           | 1.54 | 0.0126 |
| <i>Ctnna3</i>       | catenin (cadherin associated protein), alpha 3                             | 1.54 | 0.0169 |
| <i>LOC102547484</i> | uncharacterized LOC102547484                                               | 1.54 | 0.0295 |
| <i>Acot3</i>        | acyl-CoA thioesterase 3                                                    | 1.54 | 0.0447 |
| <i>Rtcb</i>         | RNA 2,3-cyclic phosphate and 5-OH ligase                                   | 1.54 | 0.0000 |
| <i>Ralgps2</i>      | Ral GEF with PH domain and SH3 binding motif 2                             | 1.54 | 0.0016 |
| <i>Taldo1</i>       | transaldolase 1                                                            | 1.54 | 0.0159 |
| <i>Mgll</i>         | monoglyceride lipase                                                       | 1.54 | 0.0112 |
| <i>Hba1</i>         | hemoglobin, alpha 1                                                        | 1.54 | 0.0081 |
| <i>Cidec</i>        | cell death-inducing DFFA-like effector c                                   | 1.54 | 0.0104 |
| <i>Acot4</i>        | acyl-CoA thioesterase 4                                                    | 1.53 | 0.0247 |
| <i>Otulin</i>       | OTU deubiquitinase with linear linkage specificity                         | 1.53 | 0.0026 |
| <i>Mical2</i>       | microtubule associated monooxygenase, calponin and LIM domain containing 2 | 1.53 | 0.0183 |
| <i>Cxcl13</i>       | chemokine (C-X-C motif) ligand 13                                          | 1.53 | 0.0242 |
| <i>LOC100359600</i> | karyopherin alpha 2-like                                                   | 1.53 | 0.0068 |
| <i>Zfp867</i>       | zinc finger protein 867                                                    | 1.53 | 0.0411 |
| <i>Sepw1</i>        | selenoprotein W, 1 (Sepw1), mRNA                                           | 1.53 | 0.0089 |
| <i>Crh</i>          | corticotropin releasing hormone                                            | 1.53 | 0.0232 |
| <i>Zfp951</i>       | zinc finger protein 951                                                    | 1.53 | 0.0018 |
| <i>Sult1a1</i>      | sulfotransferase family 1A member 1                                        | 1.53 | 0.0390 |
| <i>RGD1311946</i>   | similar to RIKEN cDNA 1810055G02                                           | 1.53 | 0.0120 |
| <i>Slc30a1</i>      | solute carrier family 30 (zinc transporter), member 1                      | 1.53 | 0.0036 |
| <i>LOC102555406</i> | zinc finger protein 120-like                                               | 1.53 | 0.0130 |
| <i>Hba2</i>         | hemoglobin, alpha 2                                                        | 1.53 | 0.0054 |
| <i>Arl6ip5</i>      | ADP-ribosylation factor-like 6 interacting protein 5                       | 1.53 | 0.0160 |
| <i>Ppm1j</i>        | protein phosphatase, Mg2+/Mn2+ dependent, 1J                               | 1.53 | 0.0097 |
| <i>LOC501033</i>    | similar to UPF0258 protein KIAA1024                                        | 1.53 | 0.0028 |
| <i>Syt12</i>        | synaptotagmin-like 2 [Source:RGD Symbol;Acc:1307647]                       | 1.53 | 0.0050 |
| <i>Sptbn1</i>       | spectrin, beta, non-erythrocytic 1                                         | 1.53 | 0.0006 |
| <i>LOC100911874</i> | solute carrier family 40 member 1-like [Source:RGD Symbol;Acc:6490105]     | 1.52 | 0.0039 |
| <i>Il1rn</i>        | interleukin 1 receptor antagonist                                          | 1.52 | 0.0170 |
| <i>Pck2</i>         | phosphoenolpyruvate carboxykinase 2 (mitochondrial)                        | 1.52 | 0.0010 |
| <i>Smim12</i>       | small integral membrane protein 12                                         | 1.52 | 0.0041 |
| <i>Olr1262</i>      | olfactory receptor 1262                                                    | 1.52 | 0.0334 |
| <i>Evc</i>          | Ellis van Creveld protein                                                  | 1.52 | 0.0003 |
| <i>Cmpk1</i>        | cytidine monophosphate (UMP-CMP) kinase 1                                  | 1.52 | 0.0005 |
| <i>Capn2</i>        | calpain 2, (m/II) large subunit                                            | 1.52 | 0.0160 |
| <i>Ear11</i>        | eosinophil-associated, ribonuclease A family, member 11 (Ear11), mRNA      | 1.52 | 0.0382 |
| <i>Tmem101</i>      | transmembrane protein 101                                                  | 1.52 | 0.0304 |
| <i>Iah1</i>         | isoamyl acetate-hydrolyzing esterase 1 homolog                             | 1.52 | 0.0126 |
| <i>Slc40a1</i>      | solute carrier family 40 (iron-regulated transporter), member 1            | 1.52 | 0.0182 |
| <i>Iqsec2</i>       | IQ motif and Sec7 domain 2                                                 | 1.51 | 0.0075 |
| <i>Vom2r75</i>      | vomerolnasal 2 receptor, 75                                                | 1.51 | 0.0272 |
| <i>Ptgfr</i>        | prostaglandin F receptor                                                   | 1.51 | 0.0081 |
| <i>Schip1</i>       | schwannomin interacting protein 1                                          | 1.51 | 0.0372 |
| <i>Bcs1l</i>        | BC1 (ubiquinol-cytochrome c reductase) synthesis-like                      | 1.51 | 0.0036 |
| <i>Acad11</i>       | acyl-CoA dehydrogenase family, member 11                                   | 1.51 | 0.0181 |
| <i>Olr436</i>       | olfactory receptor 436                                                     | 1.51 | 0.0451 |
| <i>LOC102552920</i> | armadillo repeat-containing X-linked protein 5-like                        | 1.51 | 0.0151 |
| <i>Cpt2</i>         | carnitine palmitoyltransferase 2                                           | 1.51 | 0.0055 |
| <i>S100g</i>        | S100 calcium binding protein G                                             | 1.51 | 0.0235 |
| <i>Ltbp4</i>        | latent transforming growth factor beta binding protein 4                   | 1.51 | 0.0031 |
| <i>Ppox</i>         | protoporphyrinogen oxidase                                                 | 1.51 | 0.0300 |
| <i>Myef2</i>        | myelin expression factor 2                                                 | 1.51 | 0.0235 |
| <i>Csmd1</i>        | CUB and Sushi multiple domains 1                                           | 1.51 | 0.0408 |

|                      |                                                                                                             |      |        |
|----------------------|-------------------------------------------------------------------------------------------------------------|------|--------|
| <i>Pf4</i>           | platelet factor 4                                                                                           | 1.51 | 0.0420 |
| <i>Tmem167a</i>      | transmembrane protein 167A                                                                                  | 1.50 | 0.0003 |
| <i>Coq7</i>          | coenzyme Q7 homolog, ubiquinone (yeast)                                                                     | 1.50 | 0.0050 |
| <i>Syt6</i>          | synaptotagmin VI                                                                                            | 1.50 | 0.0000 |
| <i>Psemb8</i>        | ENCODES a protein that exhibits threonine-type endopeptidase activity (inferred)                            | 1.50 | 0.0028 |
| <i>Tas2r140</i>      | taste receptor, type 2, member 140                                                                          | 1.50 | 0.0168 |
| <i>Tecr</i>          | trans-2,3-enoyl-CoA reductase                                                                               | 1.50 | 0.0008 |
| <i>Nckap5</i>        | NCK-associated protein 5                                                                                    | 1.50 | 0.0256 |
| <i>Arf2</i>          | ADP-ribosylation factor 2                                                                                   | 1.50 | 0.0211 |
| <i>Arhgap24</i>      | Rho GTPase activating protein 24                                                                            | 1.50 | 0.0060 |
| <i>Plgrkt</i>        | plasminogen receptor, C-terminal lysine transmembrane protein                                               | 1.50 | 0.0435 |
| <i>Tmem120b</i>      | transmembrane protein 120B                                                                                  | 1.50 | 0.0032 |
| <i>Mras</i>          | muscle RAS oncogene homolog                                                                                 | 1.50 | 0.0261 |
| <i>Thnsl2</i>        | threonine synthase-like 2 (S. cerevisiae)                                                                   | 1.50 | 0.0061 |
| <i>Tagln2</i>        | transgelin 2                                                                                                | 1.50 | 0.0093 |
| <i>Pdgfd</i>         | platelet derived growth factor D                                                                            | 1.50 | 0.0337 |
| <i>Gadl1</i>         | glutamate decarboxylase-like 1                                                                              | 1.50 | 0.0146 |
| <i>Man2b2</i>        | mannosidase, alpha, class 2B, member 2                                                                      | 1.49 | 0.0082 |
| <i>Mapre2</i>        | microtubule-associated protein, RP/EB family, member 2                                                      | 1.49 | 0.0410 |
| <i>Msl3l2</i>        | male-specific lethal 3-like 2 (Drosophila)                                                                  | 1.49 | 0.0090 |
| <i>LOC100911718</i>  | cytochrome P450 2C6-like                                                                                    | 1.49 | 0.0006 |
| <i>Garnl3</i>        | ENCODES a protein that exhibits GTPase activator activity (inferred)                                        | 1.49 | 0.0132 |
| <i>Chuk</i>          | conserved helix-loop-helix ubiquitous kinase                                                                | 1.49 | 0.0005 |
| <i>Vom2r44</i>       | vomeranase 2 receptor 44                                                                                    | 1.49 | 0.0394 |
| <i>Nexn</i>          | nexilin (F actin binding protein)                                                                           | 1.49 | 0.0289 |
| <i>RGD1566085</i>    | similar to pyridoxal (pyridoxine, vitamin B6) kinase [Source:RGD Symbol;Acc:1566085]                        | 1.49 | 0.0002 |
| <i>2510049J12Rik</i> | RIKEN cDNA 2510049J12 gene                                                                                  | 1.49 | 0.0484 |
| <i>Tcn2</i>          | transcobalamin 2                                                                                            | 1.49 | 0.0401 |
| <i>Sptb</i>          | spectrin, beta, erythrocytic                                                                                | 1.49 | 0.0235 |
| <i>Cdk17</i>         | cyclin-dependent kinase 17                                                                                  | 1.49 | 0.0388 |
| <i>Vom2r1</i>        | vomeranase 2 receptor, 1                                                                                    | 1.49 | 0.0475 |
| <i>Ccdc171</i>       | coiled-coil domain containing 171                                                                           | 1.49 | 0.0049 |
| <i>Ctsd</i>          | cathepsin D                                                                                                 | 1.49 | 0.0108 |
| <i>Cryz</i>          | crystallin, zeta (quinone reductase)                                                                        | 1.49 | 0.0173 |
| <i>Tcf7l1</i>        | transcription factor 7-like 1 (T-cell specific, HMG-box)                                                    | 1.49 | 0.0372 |
| <i>LOC100294508</i>  | dyslexia susceptibility 2-like                                                                              | 1.49 | 0.0006 |
| <i>Atf7ip</i>        | activating transcription factor 7 interacting protein                                                       | 1.49 | 0.0219 |
| <i>Acvr1l</i>        | activin A receptor type II-like 1                                                                           | 1.48 | 0.0001 |
| <i>Agap3</i>         | arf-GAP with GTPase, ANK repeat and PH domain-containing protein 3 [Source:RefSeq peptide;Acc:NP_001102086] | 1.48 | 0.0281 |
| <i>Hsd12</i>         | hydroxysteroid dehydrogenase like 2                                                                         | 1.48 | 0.0172 |
| <i>Tpm4</i>          | tropomyosin 4                                                                                               | 1.48 | 0.0253 |
| <i>Pigk</i>          | phosphatidylinositol glycan anchor biosynthesis, class K                                                    | 1.48 | 0.0050 |
| <i>Sema3c</i>        | sema domain, immunoglobulin domain (Ig), short basic domain, secreted, (semaphorin) 3C                      | 1.48 | 0.0081 |
| ---                  | Uncharacterized protein                                                                                     | 1.48 | 0.0199 |
| <i>Vcl</i>           | vinculin                                                                                                    | 1.48 | 0.0028 |
| <i>LOC367597</i>     | similar to nidogen 2                                                                                        | 1.48 | 0.0142 |
| <i>RGD1305587</i>    | similar to RIKEN cDNA 2010107G23                                                                            | 1.48 | 0.0118 |
| <i>Vsx1</i>          | visual system homeobox 1                                                                                    | 1.48 | 0.0218 |
| <i>Entpd8</i>        | ectonucleoside triphosphate diphosphohydrolase 8                                                            | 1.48 | 0.0151 |
| <i>Abcc3</i>         | ATP-binding cassette, subfamily C (CFTR/MRP), member 3                                                      | 1.48 | 0.0344 |
| <i>Prkca</i>         | protein kinase C, alpha                                                                                     | 1.48 | 0.0067 |
| <i>Chpf</i>          | chondroitin polymerizing factor                                                                             | 1.48 | 0.0005 |
| <i>Prelid1</i>       | PRELI domain containing 1                                                                                   | 1.48 | 0.0003 |
| <i>Peg3</i>          | paternally expressed 3                                                                                      | 1.48 | 0.0049 |

|                     |                                                                                                                  |      |        |
|---------------------|------------------------------------------------------------------------------------------------------------------|------|--------|
| <i>Hist2h3c2</i>    | histone cluster 2, H3c2                                                                                          | 1.48 | 0.0475 |
| <i>Specc1</i>       | sperm antigen with calponin homology and coiled-coil domains 1                                                   | 1.48 | 0.0052 |
| <i>Mogat3</i>       | monoacylglycerol O-acyltransferase 3                                                                             | 1.48 | 0.0240 |
| <i>RGD1560015</i>   | INTERACTS WITH ammonium chloride                                                                                 | 1.48 | 0.0282 |
| <i>Slc9a3r2</i>     | solute carrier family 9, subfamily A (NHE3, cation proton antiporter 3), member 3 regulator 2                    | 1.48 | 0.0039 |
| <i>Acat1</i>        | acetyl-CoA acetyltransferase 1                                                                                   | 1.47 | 0.0032 |
| <i>Dnaja4</i>       | DnaJ (Hsp40) homolog, subfamily A, member 4                                                                      | 1.47 | 0.0206 |
| <i>Sorcs1</i>       | sortilin-related VPS10 domain containing receptor 1                                                              | 1.47 | 0.0037 |
| <i>Ednra</i>        | endothelin receptor type A                                                                                       | 1.47 | 0.0036 |
| <i>Sgcb</i>         | sarcoglycan, beta                                                                                                | 1.47 | 0.0191 |
| <i>Cfl1</i>         | cofilin 1, non-muscle                                                                                            | 1.47 | 0.0027 |
| <i>LOC681177</i>    | similar to GTPase activating protein testicular GAP1                                                             | 1.47 | 0.0159 |
| <i>Olr1391</i>      | olfactory receptor 1391                                                                                          | 1.47 | 0.0293 |
| <i>Bloc1s5</i>      | biogenesis of lysosomal organelles complex-1, subunit 5, muted                                                   | 1.47 | 0.0034 |
| <i>LOC100911860</i> | ENCODES a protein that exhibits cysteine-type peptidase activity (inferred)                                      | 1.47 | 0.0088 |
| <i>Hadha</i>        | hydroxyacyl-CoA dehydrogenase/3-ketoacyl-CoA thiolase/enoyl-CoA hydratase (trifunctional protein), alpha subunit | 1.47 | 0.0002 |
| <i>Comm49</i>       | COMM domain containing 9                                                                                         | 1.47 | 0.0292 |
| <i>Satb1</i>        | SATB homeobox 1                                                                                                  | 1.47 | 0.0111 |
| <i>Emc1</i>         | ER membrane protein complex subunit 1                                                                            | 1.47 | 0.0449 |
| <i>Lpin2</i>        | lipin 2                                                                                                          | 1.47 | 0.0498 |
| <i>Olr377</i>       | olfactory receptor 377                                                                                           | 1.47 | 0.0049 |
| <i>Slco6d1</i>      | solute carrier organic anion transporter family, member 6d1 [Source:RGD Symbol;Acc:1359388]                      | 1.47 | 0.0160 |
| <i>Herc3</i>        | HECT and RLD domain containing E3 ubiquitin protein ligase 3                                                     | 1.47 | 0.0016 |
| <i>Npy</i>          | neuropeptide Y                                                                                                   | 1.47 | 0.0048 |
| <i>Gnat3</i>        | guanine nucleotide binding protein, alpha transducing 3                                                          | 1.47 | 0.0171 |
| <i>Wfdc3</i>        | WAP four-disulfide core domain 3                                                                                 | 1.47 | 0.0473 |
| <i>Gnptab</i>       | N-acetylglucosamine-1-phosphate transferase, alpha and beta subunits                                             | 1.47 | 0.0175 |
| <i>Ap3s2</i>        | adaptor-related protein complex 3, sigma 2 subunit                                                               | 1.46 | 0.0007 |
| <i>Carf</i>         | calcium responsive transcription factor                                                                          | 1.46 | 0.0374 |
| <i>Bahd1</i>        | bromo adjacent homology domain containing 1                                                                      | 1.46 | 0.0171 |
| <i>Tmem126a</i>     | transmembrane protein 126A                                                                                       | 1.46 | 0.0006 |
| <i>Kif21a</i>       | kinesin family member 21A                                                                                        | 1.46 | 0.0009 |
| <i>Arpp19</i>       | cAMP-regulated phosphoprotein 19 (Arpp19), mRNA                                                                  | 1.46 | 0.0130 |
| <i>Zfp36l2</i>      | zinc finger protein 36, C3H type-like 2                                                                          | 1.46 | 0.0297 |
| <i>Clcn2</i>        | chloride channel, voltage-sensitive 2                                                                            | 1.46 | 0.0185 |
| <i>Osgepl1</i>      | O-sialoglycoprotein endopeptidase-like 1                                                                         | 1.46 | 0.0214 |
| <i>Tp53inp1</i>     | tumor protein p53 inducible nuclear protein 1                                                                    | 1.46 | 0.0183 |
| <i>Leap2</i>        | liver-expressed antimicrobial peptide 2                                                                          | 1.46 | 0.0322 |
| <i>Abcg3l1</i>      | ATP-binding cassette, subfamily G (WHITE), member 3-like 1                                                       | 1.46 | 0.0048 |
| <i>Armxc6</i>       | armadillo repeat containing, X-linked 6                                                                          | 1.46 | 0.0088 |
| <i>Zfp36l2</i>      | zinc finger protein 36, C3H type-like 2                                                                          | 1.46 | 0.0175 |
| <i>Fam114a1</i>     | family with sequence similarity 114, member A1                                                                   | 1.46 | 0.0304 |
| <i>Pamr1</i>        | peptidase domain containing associated with muscle regeneration 1                                                | 1.46 | 0.0071 |
| <i>Gtf2h2</i>       | general transcription factor IIH, polypeptide 2                                                                  | 1.46 | 0.0198 |
| <i>Phactr2</i>      | phosphatase and actin regulator 2                                                                                | 1.46 | 0.0299 |
| <i>Slc13a2</i>      | solute carrier family 13 (sodium-dependent dicarboxylate transporter), member 2                                  | 1.46 | 0.0384 |
| <i>Tpm3</i>         | tropomyosin 3                                                                                                    | 1.46 | 0.0008 |
| <i>Nlrp14</i>       | NLR family, pyrin domain containing 14                                                                           | 1.46 | 0.0082 |
| <i>B4galt6</i>      | UDP-Gal:betaGlcNAc beta 1,4-galactosyltransferase, polypeptide 6                                                 | 1.46 | 0.0133 |
| <i>Fhl1</i>         | four and a half LIM domains 1                                                                                    | 1.45 | 0.0183 |
| <i>Naprt</i>        | nicotinate phosphoribosyltransferase                                                                             | 1.45 | 0.0099 |
| <i>Synj2</i>        | synaptojanin 2                                                                                                   | 1.45 | 0.0333 |
| <i>Vim</i>          | vimentin                                                                                                         | 1.45 | 0.0001 |
| <i>Cpb1</i>         | carboxypeptidase B1 (tissue)                                                                                     | 1.45 | 0.0290 |

|                     |                                                                                                                      |      |        |
|---------------------|----------------------------------------------------------------------------------------------------------------------|------|--------|
| <i>Pcdhgb4</i>      | protocadherin gamma subfamily B, 4                                                                                   | 1.45 | 0.0147 |
| <i>Ppa1</i>         | pyrophosphatase (inorganic) 1                                                                                        | 1.45 | 0.0097 |
| <i>Cd24</i>         | CD24 molecule                                                                                                        | 1.45 | 0.0258 |
| <i>Coq5</i>         | coenzyme Q5, methyltransferase                                                                                       | 1.45 | 0.0125 |
| <i>Fads1</i>        | fatty acid desaturase 1                                                                                              | 1.45 | 0.0243 |
| <i>Atp6v1e1</i>     | ATPase, H+ transporting, lysosomal V1 subunit E1                                                                     | 1.45 | 0.0025 |
| <i>Tlr3</i>         | toll-like receptor 3                                                                                                 | 1.45 | 0.0097 |
| <i>Lama2</i>        | laminin, alpha 2                                                                                                     | 1.45 | 0.0031 |
| <i>LOC102551184</i> | INTERACTS WITH arsenite(3-) (ortholog) AND cyclosporin A (ortholog)<br>AND diarsenic trioxide (ortholog)             | 1.45 | 0.0010 |
| <i>Tex13</i>        | testis expressed gene 13                                                                                             | 1.45 | 0.0039 |
| <i>Cbr1</i>         | carbonyl reductase 1                                                                                                 | 1.45 | 0.0399 |
| <i>Laptm5</i>       | lysosomal protein transmembrane 5                                                                                    | 1.45 | 0.0106 |
| <i>Lyar</i>         | Ly1 antibody reactive                                                                                                | 1.45 | 0.0070 |
| <i>RGD1308195</i>   | similar to secreted Ly6/uPAR related protein 2                                                                       | 1.45 | 0.0062 |
| <i>Acp5</i>         | acid phosphatase 5, tartrate resistant                                                                               | 1.45 | 0.0118 |
| <i>Trip11</i>       | thyroid hormone receptor interactor 11                                                                               | 1.45 | 0.0135 |
| <i>Bckdhhb</i>      | branched chain keto acid dehydrogenase E1, beta polypeptide                                                          | 1.45 | 0.0004 |
| <i>LOC100909622</i> | INTERACTS WITH (-)-epigallocatechin 3-gallate (ortholog) AND aflatoxin<br>B1 (ortholog) AND cyclosporin A (ortholog) | 1.45 | 0.0177 |
| <i>Stau2</i>        | staufen double-stranded RNA binding protein 2                                                                        | 1.45 | 0.0126 |
| <i>LOC102547118</i> | retinitis pigmentosa 1-like 1 protein-like [Source:RGD Symbol;Acc:7681336]                                           | 1.45 | 0.0297 |
| <i>Gpx7</i>         | glutathione peroxidase 7                                                                                             | 1.45 | 0.0375 |
| <i>Ces2g</i>        | carboxylesterase 2G                                                                                                  | 1.45 | 0.0418 |
| <i>Tprg1l</i>       | tumor protein p63 regulated 1-like                                                                                   | 1.45 | 0.0054 |
| <i>Hrasls</i>       | HRAS-like suppressor                                                                                                 | 1.44 | 0.0115 |
| <i>Alox15</i>       | arachidonate 15-lipoxygenase                                                                                         | 1.44 | 0.0209 |
| <i>LOC691670</i>    | similar to natural killer cell protease 7                                                                            | 1.44 | 0.0037 |
| <i>Ccdc152</i>      | coiled-coil domain containing 152                                                                                    | 1.44 | 0.0307 |
| <i>Ccdc88c</i>      | coiled-coil domain containing 88C                                                                                    | 1.44 | 0.0283 |
| <i>Cox10</i>        | COX10 heme A:farnesyltransferase cytochrome c oxidase assembly factor                                                | 1.44 | 0.0252 |
| <i>Jph4</i>         | junctophilin 4                                                                                                       | 1.44 | 0.0060 |
| <i>LOC100910833</i> | histone-lysine N-methyltransferase setd3-like                                                                        | 1.44 | 0.0029 |
| <i>Scamp5</i>       | secretory carrier membrane protein 5                                                                                 | 1.44 | 0.0325 |
| <i>Ccnb2</i>        | cyclin B2                                                                                                            | 1.44 | 0.0435 |
| <i>Faap24</i>       | Fanconi anemia core complex associated protein 24                                                                    | 1.44 | 0.0229 |
| <i>Olr372</i>       | olfactory receptor 372                                                                                               | 1.44 | 0.0237 |
| <i>Oprm1</i>        | opioid receptor, mu 1                                                                                                | 1.44 | 0.0011 |
| <i>LOC100909786</i> | INTERACTS WITH 17beta-hydroxy-17-methylestra-4 9 11-trien-3-one<br>(ortholog)                                        | 1.44 | 0.0081 |
| <i>RGD1560273</i>   | RGD1560273                                                                                                           | 1.44 | 0.0251 |
| <i>LOC100910708</i> | INVOLVED IN oxidation-reduction process (inferred) AND INTERACTS<br>WITH (R)-acetoin (ortholog)                      | 1.44 | 0.0359 |
| <i>Tpgs2</i>        | tubulin polyglutamylase complex subunit 2                                                                            | 1.44 | 0.0027 |
| <i>Ndufa8</i>       | NADH dehydrogenase (ubiquinone) 1 alpha subcomplex, 8                                                                | 1.44 | 0.0134 |
| <i>Miox</i>         | myo-inositol oxygenase                                                                                               | 1.44 | 0.0022 |
| <i>Ageb7</i>        | melanoma antigen, family B, 7                                                                                        | 1.44 | 0.0379 |
| <i>Ift122</i>       | intraflagellar transport 122                                                                                         | 1.44 | 0.0156 |
| <i>Etl4</i>         | Protein Etl4                                                                                                         | 1.43 | 0.0299 |
| <i>LOC691272</i>    | similar to reproductive homeobox on X chromosome, 11                                                                 | 1.43 | 0.0454 |
| <i>Cttnbp2nl</i>    | CTTNBP2 N-terminal like                                                                                              | 1.43 | 0.0170 |
| <i>Cygb</i>         | cytoglobin                                                                                                           | 1.43 | 0.0357 |
| <i>Cst3</i>         | cystatin C                                                                                                           | 1.43 | 0.0128 |
| <i>Wisp2</i>        | WNT1 inducible signaling pathway protein 2                                                                           | 1.43 | 0.0051 |
| <i>LOC100361993</i> | transmembrane protein 14C [Source:RGD Symbol;Acc:2319087]                                                            | 1.43 | 0.0185 |
| <i>Cetn2</i>        | Centrin 2, isoform CRA_a; Protein Cetn2                                                                              | 1.43 | 0.0322 |
| <i>Nt5dc2</i>       | 5-nucleotidase domain containing 2                                                                                   | 1.43 | 0.0064 |
| <i>GSTA1</i>        | Glutathione S-transferase                                                                                            | 1.43 | 0.0275 |

|                     |                                                                                   |      |        |
|---------------------|-----------------------------------------------------------------------------------|------|--------|
| <i>Efemp2</i>       | EGF-containing fibulin-like extracellular matrix protein 2                        | 1.43 | 0.0248 |
| <i>Gapdh-ps2</i>    | glyceraldehyde-3-phosphate dehydrogenase, pseudogene 2                            | 1.43 | 0.0005 |
| ---                 | Uncharacterized protein                                                           | 1.43 | 0.0324 |
| <i>Asrgl1</i>       | asparaginase like 1                                                               | 1.43 | 0.0370 |
| <i>LOC100174910</i> | glutaredoxin-like protein                                                         | 1.43 | 0.0370 |
| <i>Comm48</i>       | COMM domain containing 8                                                          | 1.43 | 0.0093 |
| <i>Syn3</i>         | synapsin III                                                                      | 1.43 | 0.0052 |
| <i>P4hb</i>         | prolyl 4-hydroxylase, beta polypeptide                                            | 1.43 | 0.0023 |
| <i>Ctgf</i>         | connective tissue growth factor                                                   | 1.43 | 0.0442 |
| <i>Eppk1</i>        | ENCODS a protein that exhibits poly(A) RNA binding (ortholog)                     | 1.43 | 0.0093 |
| <i>Hist1h4b</i>     | histone cluster 1, H4b                                                            | 1.43 | 0.0223 |
| <i>Dtnb</i>         | dystrobrevin, beta                                                                | 1.43 | 0.0013 |
| <i>Cdc25b</i>       | cell division cycle 25B                                                           | 1.43 | 0.0290 |
| <i>Kif1c</i>        | kinesin family member 1C                                                          | 1.43 | 0.0250 |
| <i>Cd151</i>        | CD151 molecule (Raph blood group)                                                 | 1.43 | 0.0006 |
| <i>RT1-N2</i>       | RT1 class Ib, locus N2                                                            | 1.43 | 0.0024 |
| <i>Decr1</i>        | 2,4-dienoyl CoA reductase 1, mitochondrial                                        | 1.42 | 0.0167 |
| <i>Atp1b3</i>       | ATPase, Na <sup>+</sup> /K <sup>+</sup> transporting, beta 3 polypeptide          | 1.42 | 0.0010 |
| <i>Fam20b</i>       | family with sequence similarity 20, member B                                      | 1.42 | 0.0222 |
| <i>Serpinb6</i>     | serpin peptidase inhibitor, clade B (ovalbumin), member 6                         | 1.42 | 0.0098 |
| <i>Trpm2</i>        | transient receptor potential cation channel, subfamily M, member 2                | 1.42 | 0.0172 |
| <i>Ogdhl</i>        | oxoglutarate dehydrogenase-like                                                   | 1.42 | 0.0012 |
| <i>Dlst</i>         | dihydrolipoamide S-succinyltransferase (E2 component of 2-oxo-glutarate complex)  | 1.42 | 0.0001 |
| <i>Pfkf</i>         | phosphofructokinase, liver                                                        | 1.42 | 0.0088 |
| <i>Sec13</i>        | SEC13 homolog, nuclear pore and COPII coat complex component                      | 1.42 | 0.0184 |
| <i>Xrcc6</i>        | X-ray repair complementing defective repair in Chinese hamster cells 6            | 1.42 | 0.0151 |
| <i>Rbm48</i>        | RNA binding motif protein 48                                                      | 1.42 | 0.0012 |
| <i>Pbsn</i>         | probasin                                                                          | 1.42 | 0.0035 |
| <i>Rcl1</i>         | RNA terminal phosphate cyclase-like 1                                             | 1.42 | 0.0211 |
| <i>Abhd12</i>       | abhydrolase domain containing 12                                                  | 1.42 | 0.0449 |
| <i>Arl6</i>         | ADP-ribosylation factor-like 6                                                    | 1.42 | 0.0143 |
| <i>Ssbp3</i>        | single stranded DNA binding protein 3                                             | 1.42 | 0.0038 |
| <i>RGD1564138</i>   | similar to 60S ribosomal protein L29 (P23) [Source:RGD Symbol;Acc:1564138]        | 1.42 | 0.0129 |
| <i>Ccnb1ip1</i>     | cyclin B1 interacting protein 1, E3 ubiquitin protein ligase                      | 1.42 | 0.0326 |
| <i>Pip4k2b</i>      | phosphatidylinositol-5-phosphate 4-kinase, type II, beta                          | 1.42 | 0.0184 |
| <i>Mad2l2</i>       | MAD2 mitotic arrest deficient-like 2 (yeast)                                      | 1.42 | 0.0242 |
| <i>Nr1h5</i>        | nuclear receptor subfamily 1, group H, member 5                                   | 1.42 | 0.0015 |
| <i>Nmi</i>          | N-myc (and STAT) interactor                                                       | 1.42 | 0.0089 |
| <i>Tmem70</i>       | transmembrane protein 70                                                          | 1.42 | 0.0337 |
| <i>Skp1</i>         | S-phase kinase-associated protein 1                                               | 1.42 | 0.0045 |
| <i>Traf1</i>        | TRAF type zinc finger domain containing 1                                         | 1.42 | 0.0105 |
| <i>Ngfrap1</i>      | nerve growth factor receptor (TNFRSF16) associated protein 1                      | 1.42 | 0.0425 |
| <i>LOC100912836</i> | leucine-rich repeat-containing protein PRAME-like [Source:RGD Symbol;Acc:6485636] | 1.42 | 0.0163 |
| <i>Kng1</i>         | kininogen 1kininogen 2                                                            | 1.42 | 0.0031 |
| <i>Carhsp1</i>      | calcium regulated heat stable protein 1                                           | 1.42 | 0.0166 |
| <i>Fbxo43</i>       | F-box protein 43                                                                  | 1.41 | 0.0188 |
| <i>Bsg</i>          | basigin (Ok blood group)                                                          | 1.41 | 0.0134 |
| <i>Sec24d</i>       | SEC24 homolog D, COPII coat complex component                                     | 1.41 | 0.0057 |
| <i>LOC100360061</i> | INTERACTS WITH 17beta-hydroxy-17-methylestra-4 9 11-trien-3-one (ortholog)        | 1.41 | 0.0438 |
| <i>Pik3r3</i>       | phosphoinositide-3-kinase, regulatory subunit 3 (gamma)                           | 1.41 | 0.0194 |
| <i>Mycl</i>         | v-myc avian myelocytomatosis viral oncogene lung carcinoma derived homolog        | 1.41 | 0.0389 |
| <i>Pdc</i>          | phosducin                                                                         | 1.41 | 0.0329 |
| <i>Bmp10</i>        | bone morphogenetic protein 10                                                     | 1.41 | 0.0081 |

|                      |                                                                                                                  |      |        |
|----------------------|------------------------------------------------------------------------------------------------------------------|------|--------|
| <i>Zfp541</i>        | zinc finger protein 541                                                                                          | 1.41 | 0.0278 |
| <i>Zfp52</i>         | zinc finger protein 52                                                                                           | 1.41 | 0.0082 |
| <i>Sult2b1</i>       | sulfotransferase family 2B member 1                                                                              | 1.41 | 0.0189 |
| <i>Syngap1</i>       | synaptic Ras GTPase activating protein 1                                                                         | 1.41 | 0.0056 |
| <i>Ppp2ca</i>        | protein phosphatase 2, catalytic subunit, alpha isozyme                                                          | 1.41 | 0.0025 |
| <i>Bin3</i>          | bridging integrator 3                                                                                            | 1.41 | 0.0020 |
| <i>LOC681736</i>     | similar to Glycolipid transfer protein (GLTP)                                                                    | 1.41 | 0.0171 |
| <i>Sec22b</i>        | SEC22 vesicle trafficking protein homolog B ( <i>S. cerevisiae</i> )                                             | 1.41 | 0.0018 |
| <i>LOC501339</i>     | similar to spermatogenesis associated glutamate (E)-rich protein 4dsimilar to zinc finger CCCH type, antiviral 1 | 1.41 | 0.0281 |
| <i>Cbx2</i>          | chromobox homolog 2                                                                                              | 1.41 | 0.0022 |
| <i>Tpi1</i>          | triosephosphate isomerase 1                                                                                      | 1.41 | 0.0216 |
| <i>LOC100909867</i>  | epididymal-specific lipocalin-13-like [Source:RGD Symbol;Acc:6501236]                                            | 1.41 | 0.0322 |
| <i>Nlr1</i>          | NLR family member X1                                                                                             | 1.41 | 0.0242 |
| <i>Gm14569</i>       | predicted gene 14569 [Source:MGI Symbol;Acc:MGI:3705243]                                                         | 1.41 | 0.0375 |
| <i>Olr1145</i>       | olfactory receptor 1145                                                                                          | 1.41 | 0.0151 |
| <i>Pgm1</i>          | phosphoglucomutase 1                                                                                             | 1.41 | 0.0006 |
| <i>Scd4</i>          | stearoyl-coenzyme A desaturase 4                                                                                 | 1.40 | 0.0432 |
| <i>Hsd17b13</i>      | hydroxysteroid (17-beta) dehydrogenase 13                                                                        | 1.40 | 0.0097 |
| <i>Ehd4</i>          | EH-domain containing 4                                                                                           | 1.40 | 0.0231 |
| <i>Lgmn</i>          | legumain                                                                                                         | 1.40 | 0.0243 |
| <i>Cfap126</i>       | cilia and flagella associated protein 126                                                                        | 1.40 | 0.0353 |
| <i>Col1a2</i>        | collagen, type I, alpha 2 (Col1a2), mRNA                                                                         | 1.40 | 0.0371 |
| <i>Tmem41a</i>       | transmembrane protein 41a                                                                                        | 1.40 | 0.0202 |
| <i>Acad9</i>         | acyl-CoA dehydrogenase family, member 9                                                                          | 1.40 | 0.0007 |
| <i>Pot1</i>          | protection of telomeres 1                                                                                        | 1.40 | 0.0037 |
| <i>Mtmr9</i>         | myotubularin related protein 9                                                                                   | 1.40 | 0.0493 |
| <i>LOC100360238</i>  | rCG21419-like                                                                                                    | 1.40 | 0.0225 |
| <i>RGD1565367</i>    | similar to Solute carrier family 23, member 2 (Sodium-dependent vitamin C transporter 2)                         | 1.40 | 0.0385 |
| <i>Eif2b2</i>        | eukaryotic translation initiation factor 2B, subunit 2 beta                                                      | 1.40 | 0.0027 |
| <i>Cd82</i>          | Cd82 molecule                                                                                                    | 1.40 | 0.0095 |
| <i>Ndst4</i>         | N-deacetylase/N-sulfotransferase (heparan glucosaminyl) 4                                                        | 1.40 | 0.0118 |
| <i>Mxd4</i>          | Max dimerization protein 4                                                                                       | 1.40 | 0.0072 |
| <i>LOC679149</i>     | similar to carboxylesterase 2 (intestine, liver)                                                                 | 1.40 | 0.0225 |
| <i>Mesdc2</i>        | mesoderm development candidate 2                                                                                 | 1.40 | 0.0027 |
| <i>Asah1</i>         | N-acylsphingosine amidohydrolase (acid ceramidase) 1                                                             | 1.40 | 0.0042 |
| <i>Akr1c14</i>       | aldo-keto reductase family 1, member C14                                                                         | 1.40 | 0.0297 |
| <i>Gapdh</i>         | glyceraldehyde-3-phosphate dehydrogenase                                                                         | 1.40 | 0.0001 |
| <i>LOC100909548</i>  | INTERACTS WITH chloroquine AND diuron AND 17alpha-ethynylestradiol (ortholog)                                    | 1.40 | 0.0003 |
| <i>LOC102554321</i>  | uncharacterized LOC102554321                                                                                     | 1.40 | 0.0126 |
| <i>RGD1564836</i>    | similar to HMGA1b                                                                                                | 1.40 | 0.0187 |
| <i>Tmem14a</i>       | transmembrane protein 14A                                                                                        | 1.40 | 0.0347 |
| <i>Bcr</i>           | breakpoint cluster region [Source:RGD Symbol;Acc:1307993]                                                        | 1.40 | 0.0383 |
| <i>Rnase17</i>       | ribonuclease 17                                                                                                  | 1.39 | 0.0400 |
| <i>Tgoln2</i>        | trans-golgi network protein 2                                                                                    | 1.39 | 0.0235 |
| <i>Mcam</i>          | melanoma cell adhesion molecule                                                                                  | 1.39 | 0.0370 |
| <i>Slc39a10</i>      | solute carrier family 39 (zinc transporter), member 10                                                           | 1.39 | 0.0298 |
| <i>Hist1h1b</i>      | histone cluster 1, H1b                                                                                           | 1.39 | 0.0243 |
| <i>NONMMUG026947</i> | Non-coding transcript identified by NONCODE: Exonic                                                              | 1.39 | 0.0206 |
| <i>Adh5</i>          | alcohol dehydrogenase 5 (class III), chi polypeptide                                                             | 1.39 | 0.0317 |
| <i>Pde5a</i>         | phosphodiesterase 5A, cGMP-specific                                                                              | 1.39 | 0.0342 |
| <i>Hist1h4b</i>      | histone cluster 1, H4b [Source:RGD Symbol;Acc:620814]                                                            | 1.39 | 0.0228 |
| <i>Cd151</i>         | CD151 molecule (Raph blood group) (Cd151), mRNA                                                                  | 1.39 | 0.0028 |
| <i>Atg4a</i>         | autophagy related 4A, cysteine peptidase                                                                         | 1.39 | 0.0349 |
| <i>Pdxk</i>          | pyridoxal (pyridoxine, vitamin B6) kinase                                                                        | 1.39 | 0.0143 |

|                      |                                                                                          |      |        |
|----------------------|------------------------------------------------------------------------------------------|------|--------|
| <i>Ackr3</i>         | atypical chemokine receptor 3                                                            | 1.39 | 0.0193 |
| <i>Comt</i>          | catechol-O-methyltransferase                                                             | 1.39 | 0.0039 |
| <i>Galt</i>          | galactose-1-phosphate uridylyltransferase                                                | 1.39 | 0.0067 |
| <i>Ybx3</i>          | Y box binding protein 3                                                                  | 1.39 | 0.0156 |
| <i>Epha7</i>         | Eph receptor A7                                                                          | 1.39 | 0.0092 |
| <i>Trim65</i>        | tripartite motif-containing 65                                                           | 1.39 | 0.0157 |
| <i>Hscb</i>          | HscB mitochondrial iron-sulfur cluster co-chaperone                                      | 1.39 | 0.0112 |
| <i>Ippk</i>          | inositol 1,3,4,5,6-pentakisphosphate 2-kinase                                            | 1.39 | 0.0340 |
| <i>Rnpep</i>         | arginyl aminopeptidase (aminopeptidase B)                                                | 1.39 | 0.0107 |
| <i>Icmt</i>          | isoprenylcysteine carboxyl methyltransferase                                             | 1.39 | 0.0033 |
| <i>Nudt13</i>        | nudix (nucleoside diphosphate linked moiety X)-type motif 13                             | 1.39 | 0.0340 |
| <i>Olr1107</i>       | olfactory receptor 1107                                                                  | 1.39 | 0.0320 |
| <i>Acy1</i>          | aminoacylase 1                                                                           | 1.39 | 0.0364 |
| <i>NONMMUG023236</i> | Non-coding transcript identified by NONCODE: Sense No Exonic                             | 1.39 | 0.0192 |
| <i>Cybb</i>          | cytochrome b-245, beta polypeptide                                                       | 1.39 | 0.0025 |
| <i>Dgkz</i>          | diacylglycerol kinase zeta                                                               | 1.39 | 0.0394 |
| <i>Npy</i>           | neuropeptide Y (Npy), mRNA                                                               | 1.39 | 0.0095 |
| <i>Tmem25</i>        | transmembrane protein 25                                                                 | 1.39 | 0.0120 |
| <i>Tmprss6</i>       | transmembrane protease, serine 6                                                         | 1.39 | 0.0227 |
| <i>Mfrp</i>          | membrane frizzled-related protein                                                        | 1.39 | 0.0493 |
| <i>Olr853</i>        | olfactory receptor 853                                                                   | 1.39 | 0.0380 |
| <i>Nkx2-4</i>        | NK2 homeobox 4                                                                           | 1.38 | 0.0005 |
| <i>Pacsin2</i>       | protein kinase C and casein kinase substrate in neurons 2                                | 1.38 | 0.0204 |
| <i>Sparcl1</i>       | SPARC-like 1 (hevin)                                                                     | 1.38 | 0.0287 |
| <i>Hsd17b12</i>      | hydroxysteroid (17-beta) dehydrogenase 12                                                | 1.38 | 0.0042 |
| <i>Cdrt4</i>         | CMT1A duplicated region transcript 4                                                     | 1.38 | 0.0499 |
| <i>Mrpl37</i>        | mitochondrial ribosomal protein L37                                                      | 1.38 | 0.0043 |
| <i>Lilrb3</i>        | leukocyte immunoglobulin-like receptor, subfamily B (with TM and ITIM domains), member 3 | 1.38 | 0.0429 |
| <i>Aldoat2</i>       | aldolase 1 A retrogene 2                                                                 | 1.38 | 0.0179 |
| <i>Flna</i>          | filamin A, alpha                                                                         | 1.38 | 0.0252 |
| <i>LOC100911477</i>  | nidogen-2-like                                                                           | 1.38 | 0.0217 |
| <i>Ttc36</i>         | tetratricopeptide repeat domain 36                                                       | 1.38 | 0.0235 |
| <i>Snx7</i>          | sorting nexin 7                                                                          | 1.38 | 0.0337 |
| <i>Cers5</i>         | ceramide synthase 5                                                                      | 1.38 | 0.0190 |
| <i>Kpna2</i>         | karyopherin alpha 2                                                                      | 1.38 | 0.0339 |
| <i>Mbd2</i>          | methyl-CpG binding domain protein 2                                                      | 1.38 | 0.0007 |
| <i>LOC102555146</i>  | fatty acid-binding protein epidermal-like                                                | 1.38 | 0.0049 |
| <i>Slc25a1</i>       | solute carrier family 25 (mitochondrial carrier, citrate transporter), member 1          | 1.38 | 0.0024 |
| <i>LOC684841</i>     | ENCODES a protein that exhibits DNA binding (inferred)                                   | 1.38 | 0.0089 |
| <i>Fam159b</i>       | family with sequence similarity 159, member B [Source:RGD Symbol;Acc:1564672]            | 1.38 | 0.0465 |
| <i>Cnpy1</i>         | canopy FGF signaling regulator 1 [Source:RGD Symbol;Acc:1583296]                         | 1.38 | 0.0021 |
| <i>Ccna2</i>         | cyclin A2                                                                                | 1.37 | 0.0234 |
| <i>Zfp511</i>        | zinc finger protein 511                                                                  | 1.37 | 0.0085 |
| <i>Gsta1</i>         | glutathione S-transferase alpha 1                                                        | 1.37 | 0.0313 |
| <i>Fnbp1l</i>        | formin binding protein 1-like                                                            | 1.37 | 0.0210 |
| <i>Lpgat1</i>        | lysophosphatidylglycerol acyltransferase 1                                               | 1.37 | 0.0044 |
| <i>Slitrk6</i>       | SLIT and NTRK-like family, member 6                                                      | 1.37 | 0.0329 |
| <i>Mrpl13</i>        | mitochondrial ribosomal protein L13                                                      | 1.37 | 0.0382 |
| <i>Plau</i>          | plasminogen activator, urokinase                                                         | 1.37 | 0.0317 |
| <i>Tp53i3</i>        | tumor protein p53 inducible protein 3                                                    | 1.37 | 0.0085 |
| <i>Odc1</i>          | ornithine decarboxylase 1                                                                | 1.37 | 0.0020 |
| <i>Papss1</i>        | 3-phosphoadenosine 5-phosphosulfate synthase 1                                           | 1.37 | 0.0369 |
| <i>Acaa1b</i>        | acetyl-Coenzyme A acyltransferase 1B                                                     | 1.37 | 0.0088 |
| <i>Sucla2</i>        | succinate-CoA ligase, ADP-forming, beta subunit                                          | 1.37 | 0.0022 |



|                   |                                                                                                              |      |        |
|-------------------|--------------------------------------------------------------------------------------------------------------|------|--------|
| <i>Sowahc</i>     | sosondowah ankyrin repeat domain family member C                                                             | 1.37 | 0.0036 |
| <i>Mvd</i>        | mevalonate (diphospho) decarboxylase                                                                         | 1.37 | 0.0413 |
| <i>Mmp27</i>      | matrix metalloproteinase 27                                                                                  | 1.37 | 0.0348 |
| <i>Macrocl1</i>   | MACRO domain containing 1                                                                                    | 1.37 | 0.0283 |
| <i>Zfp7</i>       | zinc finger protein 7                                                                                        | 1.37 | 0.0250 |
| <i>Fam213b</i>    | family with sequence similarity 213, member B                                                                | 1.37 | 0.0045 |
| <i>Fto</i>        | fat mass and obesity associated (Fto), mRNA.                                                                 | 1.37 | 0.0424 |
| <i>Lilra5</i>     | leukocyte immunoglobulin-like receptor, subfamily A (with TM domain), member 5                               | 1.37 | 0.0022 |
| <i>Sgcg</i>       | sarcoglycan, gamma                                                                                           | 1.37 | 0.0092 |
| <i>Map4k2</i>     | mitogen activated protein kinase kinase kinase kinase 2                                                      | 1.37 | 0.0455 |
| <i>LOC303448</i>  | similar to glyceraldehyde-3-phosphate dehydrogenase                                                          | 1.37 | 0.0085 |
| <i>Tes</i>        | testin LIM domain protein                                                                                    | 1.37 | 0.0232 |
| <i>RGD1562690</i> | PARTICIPATES IN cysteine and methionine metabolic pathway AND gluconeogenesis pathway AND glycolysis pathway | 1.37 | 0.0004 |
| <i>Dnajc19</i>    | DnaJ (Hsp40) homolog, subfamily C, member 19                                                                 | 1.36 | 0.0062 |
| <i>Snx21</i>      | ---                                                                                                          | 1.36 | 0.0130 |
| <i>LOC500684</i>  | hypothetical protein LOC500684                                                                               | 1.36 | 0.0019 |
| <i>Col14a1</i>    | collagen, type XIV, alpha 1                                                                                  | 1.36 | 0.0375 |
| <i>LOC684475</i>  | similar to tumor protein p53 inducible protein 3                                                             | 1.36 | 0.0322 |
| <i>Letmd1</i>     | LETMD1 domain containing 1                                                                                   | 1.36 | 0.0113 |
| <i>Sirpb2l1</i>   | INTERACTS WITH 17beta-estradiol (ortholog)                                                                   | 1.36 | 0.0138 |
| <i>Mapk</i>       | v-maf avian musculoaponeurotic fibrosarcoma oncogene homolog K                                               | 1.36 | 0.0412 |
| <i>Srp14</i>      | signal recognition particle 14                                                                               | 1.36 | 0.0197 |
| <i>Suclg1</i>     | succinate-CoA ligase, alpha subunit                                                                          | 1.36 | 0.0082 |
| <i>Mppe1</i>      | metallophosphoesterase 1                                                                                     | 1.36 | 0.0327 |
| <i>04. Sep</i>    | septin 4                                                                                                     | 1.36 | 0.0325 |
| ---               | Uncharacterized protein                                                                                      | 1.36 | 0.0287 |
| ---               | Uncharacterized protein                                                                                      | 1.36 | 0.0446 |
| <i>P4ha3</i>      | prolyl 4-hydroxylase, alpha polypeptide III                                                                  | 1.36 | 0.0203 |
| <i>Sardh</i>      | sarcosine dehydrogenase                                                                                      | 1.36 | 0.0366 |
| <i>Krt23</i>      | keratin 23, type I                                                                                           | 1.36 | 0.0496 |
| <i>Otub1</i>      | OTU deubiquitinase, ubiquitin aldehyde binding 1                                                             | 1.36 | 0.0164 |
| <i>Krt8</i>       | keratin 8, type II                                                                                           | 1.36 | 0.0483 |
| <i>Olr453</i>     | olfactory receptor 453                                                                                       | 1.36 | 0.0350 |
| <i>Aga</i>        | aspartylglucosaminidase                                                                                      | 1.36 | 0.0053 |
| <i>Tas1r3</i>     | taste receptor, type 1, member 3                                                                             | 1.36 | 0.0259 |
| <i>Arl2</i>       | ADP-ribosylation factor-like 2                                                                               | 1.36 | 0.0374 |
| <i>Eps15l1</i>    | ENCODES a protein that exhibits calcium ion binding (inferred)                                               | 1.36 | 0.0079 |
| <i>Tpm3</i>       | tropomyosin 3                                                                                                | 1.36 | 0.0128 |
| <i>Glg1</i>       | golgi glycoprotein 1                                                                                         | 1.36 | 0.0248 |
| <i>Efnb2</i>      | ephrin B2                                                                                                    | 1.36 | 0.0479 |
| <i>Pde4a</i>      | phosphodiesterase 4A, cAMP-specific                                                                          | 1.36 | 0.0098 |
| <i>LOC501230</i>  | similar to nidogen 2                                                                                         | 1.36 | 0.0050 |
| <i>Psph</i>       | phosphoserine phosphatase                                                                                    | 1.36 | 0.0301 |
| <i>Pcdhgb5</i>    | protocadherin gamma subfamily B, 5                                                                           | 1.36 | 0.0373 |
| <i>Kifc1</i>      | kinesin family member C1                                                                                     | 1.36 | 0.0122 |
| <i>Adam23</i>     | ADAM metalloproteinase domain 23                                                                             | 1.36 | 0.0248 |
| <i>Snx5</i>       | sorting nexin 5                                                                                              | 1.35 | 0.0170 |
| <i>Aco2</i>       | aconitase 2, mitochondrial                                                                                   | 1.35 | 0.0337 |
| <i>Veph1</i>      | ventricular zone expressed PH domain-containing 1                                                            | 1.35 | 0.0239 |
| <i>Gpx1</i>       | glutathione peroxidase 1                                                                                     | 1.35 | 0.0039 |
| <i>Tp53i11</i>    | tumor protein p53 inducible protein 11                                                                       | 1.35 | 0.0301 |
| <i>Ldha</i>       | lactate dehydrogenase A                                                                                      | 1.35 | 0.0013 |
| <i>Sub1</i>       | SUB1 homolog, transcriptional regulator                                                                      | 1.35 | 0.0118 |
| <i>Etfa</i>       | electron-transfer-flavoprotein, alpha polypeptide                                                            | 1.35 | 0.0171 |
| <i>Cd63</i>       | Cd63 molecule                                                                                                | 1.35 | 0.0494 |
| <i>Cotl1</i>      | coactosin-like F-actin binding protein 1                                                                     | 1.35 | 0.0273 |

|                     |                                                                                             |      |        |
|---------------------|---------------------------------------------------------------------------------------------|------|--------|
| <i>Lamp3</i>        | lysosomal-associated membrane protein 3                                                     | 1.35 | 0.0039 |
| <i>Cd99l2</i>       | CD99 molecule-like 2 [Source:RGD Symbol;Acc:620896]                                         | 1.35 | 0.0182 |
| <i>LOC102553500</i> | uncharacterized LOC102553500                                                                | 1.35 | 0.0003 |
| <i>Acaa2</i>        | acetyl-CoA acyltransferase 2                                                                | 1.35 | 0.0123 |
| <i>Flvcr2</i>       | feline leukemia virus subgroup C cellular receptor family, member 2                         | 1.35 | 0.0261 |
| <i>Prdm16</i>       | PR domain containing 16                                                                     | 1.35 | 0.0181 |
| <i>Spata7</i>       | spermatogenesis associated 7                                                                | 1.35 | 0.0254 |
| <i>Snx9</i>         | sorting nexin 9                                                                             | 1.35 | 0.0262 |
| <i>Atp5o</i>        | ATP synthase, H <sup>+</sup> transporting, mitochondrial F1 complex, O subunit              | 1.35 | 0.0493 |
| <i>Bbox1</i>        | butyrobetaine (gamma), 2-oxoglutarate dioxygenase (gamma-butyrobetaine hydroxylase) 1       | 1.35 | 0.0356 |
| <i>Ank3</i>         | ankyrin 3, node of Ranvier (ankyrin G)                                                      | 1.35 | 0.0085 |
| <i>Ano10</i>        | anoctamin 10                                                                                | 1.35 | 0.0413 |
| <i>Abrac1</i>       | ABRA C-terminal like                                                                        | 1.35 | 0.0484 |
| <i>Ppp5c</i>        | protein phosphatase 5, catalytic subunit                                                    | 1.35 | 0.0103 |
| <i>Polb</i>         | polymerase (DNA directed), beta                                                             | 1.35 | 0.0109 |
| <i>Tstd3</i>        | thiosulfate sulfurtransferase (rhodanese)-like domain containing 3                          | 1.35 | 0.0452 |
| <i>Cplx2</i>        | complexin 2                                                                                 | 1.35 | 0.0498 |
| <i>Rfx5</i>         | regulatory factor X, 5 (influences HLA class II expression)                                 | 1.35 | 0.0384 |
| <i>Mien1</i>        | migration and invasion enhancer 1                                                           | 1.35 | 0.0233 |
| <i>Atp6v1a</i>      | ATPase, H <sup>+</sup> transporting, lysosomal V1 subunit A                                 | 1.35 | 0.0379 |
| <i>Tpsg1</i>        | tryptase gamma 1                                                                            | 1.35 | 0.0380 |
| <i>Psd2</i>         | pleckstrin and Sec7 domain containing 2                                                     | 1.34 | 0.0355 |
| <i>Rgma</i>         | repulsive guidance molecule family member A                                                 | 1.34 | 0.0336 |
| <i>Chchd6</i>       | coiled-coil-helix-coiled-coil-helix domain containing 6                                     | 1.34 | 0.0387 |
| <i>Zmat3</i>        | zinc finger, matrin type 3                                                                  | 1.34 | 0.0437 |
| <i>Ahnak</i>        | AHNAK nucleoprotein                                                                         | 1.34 | 0.0071 |
| <i>Rala</i>         | v-ral simian leukemia viral oncogene homolog A (ras related)                                | 1.34 | 0.0009 |
| <i>Kif4a</i>        | kinesin family member 4A                                                                    | 1.34 | 0.0161 |
| <i>Ndufs5</i>       | NADH dehydrogenase (ubiquinone) Fe-S protein 5                                              | 1.34 | 0.0167 |
| <i>Strap</i>        | serine/threonine kinase receptor associated protein                                         | 1.34 | 0.0099 |
| <i>Prdm11</i>       | PR domain containing 11                                                                     | 1.34 | 0.0446 |
| <i>Mrpl1</i>        | mitochondrial ribosomal protein L1                                                          | 1.34 | 0.0384 |
| <i>Rgs2</i>         | regulator of G-protein signaling 2                                                          | 1.34 | 0.0317 |
| <i>Usp30</i>        | ubiquitin specific peptidase 30                                                             | 1.34 | 0.0174 |
| <i>LOC688925</i>    | similar to Glutathione S-transferase alpha-4                                                | 1.34 | 0.0375 |
| <i>Olr1179</i>      | olfactory receptor 1179                                                                     | 1.34 | 0.0427 |
| <i>Cep57l1</i>      | centrosomal protein 57-like 1                                                               | 1.34 | 0.0075 |
| <i>Rnf180</i>       | ring finger protein 180                                                                     | 1.34 | 0.0325 |
| <i>Actl9</i>        | actin-like 9                                                                                | 1.34 | 0.0315 |
| <i>Gyg1</i>         | glycogenin 1                                                                                | 1.34 | 0.0403 |
| <i>Hgf</i>          | hepatocyte growth factor                                                                    | 1.34 | 0.0188 |
| <i>LOC102549235</i> | uncharacterized LOC102549235                                                                | 1.34 | 0.0349 |
| <i>Gpr176</i>       | G protein-coupled receptor 176                                                              | 1.34 | 0.0133 |
| <i>Pnmal2</i>       | paraneoplastic Ma antigen family-like 2                                                     | 1.34 | 0.0408 |
| <i>Abi2</i>         | abl-interactor 2                                                                            | 1.34 | 0.0014 |
| <i>Knng1l1</i>      | kininogen 1-like 1                                                                          | 1.34 | 0.0148 |
| <i>Snap23</i>       | synaptosomal-associated protein 23                                                          | 1.34 | 0.0217 |
| <i>Slc25a27</i>     | solute carrier family 25, member 27                                                         | 1.34 | 0.0143 |
| <i>Atp5g1</i>       | ATP synthase, H <sup>+</sup> transporting, mitochondrial Fo complex, subunit C1 (subunit 9) | 1.34 | 0.0330 |
| <i>Seprw1</i>       | selenoprotein W, 1                                                                          | 1.34 | 0.0005 |
| <i>Cdc42se2</i>     | CDC42 small effector 2                                                                      | 1.34 | 0.0245 |
| <i>Tmem18</i>       | transmembrane protein 18                                                                    | 1.34 | 0.0144 |
| <i>Gcat</i>         | glycine C-acetyltransferase                                                                 | 1.34 | 0.0156 |
| <i>Ssty1</i>        | predicted gene, 21440                                                                       | 1.33 | 0.0077 |
| <i>RGD1559441</i>   | similar to MIC2L1 [Source:RGD Symbol;Acc:1559441]                                           | 1.33 | 0.0200 |
| <i>Irgq</i>         | immunity-related GTPase family, Q                                                           | 1.33 | 0.0476 |

|                     |                                                                             |      |        |
|---------------------|-----------------------------------------------------------------------------|------|--------|
| <i>Aplp1</i>        | amyloid beta (A4) precursor-like protein 1                                  | 1.33 | 0.0465 |
| <i>Pgp</i>          | phosphoglycolate phosphatase                                                | 1.33 | 0.0109 |
| <i>Prdx6</i>        | peroxiredoxin 6                                                             | 1.33 | 0.0334 |
| <i>Cdc42ep1</i>     | CDC42 effector protein (Rho GTPase binding) 1                               | 1.33 | 0.0025 |
| <i>Grik1</i>        | glutamate receptor, ionotropic, kainate 1                                   | 1.33 | 0.0281 |
| <i>Fundc1</i>       | FUN14 domain containing 1                                                   | 1.33 | 0.0413 |
| <i>Ubl3</i>         | ubiquitin-like 3                                                            | 1.33 | 0.0021 |
| <i>Nol4l</i>        | nucleolar protein 4-like                                                    | 1.33 | 0.0265 |
| <i>Lrrc75b</i>      | leucine rich repeat containing 75B                                          | 1.33 | 0.0499 |
| <i>LOC100910497</i> | INTERACTS WITH (-)-demecolcine (ortholog)                                   | 1.33 | 0.0128 |
| <i>Aasdhppt</i>     | aminoadipate-semialdehyde dehydrogenase-phosphopantetheinyl transferase     | 1.33 | 0.0040 |
| <i>Arpp19</i>       | cAMP-regulated phosphoprotein 19 [Source:RGD Symbol;Acc:71054]              | 1.33 | 0.0364 |
| <i>Glpr2</i>        | GLI pathogenesis-related 2                                                  | 1.33 | 0.0431 |
| <i>Olr1436</i>      | olfactory receptor 1436                                                     | 1.33 | 0.0335 |
| <i>Olr1436</i>      | olfactory receptor 1436 (Olr1436), mRNA                                     | 1.33 | 0.0335 |
| <i>Blvra</i>        | biliverdin reductase A                                                      | 1.33 | 0.0241 |
| <i>Lactb</i>        | lactamase, beta                                                             | 1.33 | 0.0177 |
| <i>Arf3</i>         | ADP-ribosylation factor 3 (Arf3), mRNA                                      | 1.33 | 0.0413 |
| <i>Stoml1</i>       | stomatin (EPB72)-like 1                                                     | 1.33 | 0.0112 |
| <i>Olr1311</i>      | olfactory receptor 1311                                                     | 1.33 | 0.0305 |
| <i>Fam173b</i>      | family with sequence similarity 173, member B                               | 1.33 | 0.0129 |
| <i>Slc34a1</i>      | solute carrier family 34 (type II sodium/phosphate cotransporter), member 1 | 1.33 | 0.0081 |
| <i>Pex19</i>        | peroxisomal biogenesis factor 19                                            | 1.33 | 0.0216 |
| <i>Fam96a</i>       | family with sequence similarity 96, member A                                | 1.33 | 0.0363 |
| <i>Gfm2</i>         | G elongation factor, mitochondrial 2                                        | 1.33 | 0.0278 |
| <i>Plpp2</i>        | phospholipid phosphatase 2                                                  | 1.33 | 0.0387 |
| <i>Akr1b10</i>      | aldo-keto reductase family 1, member B10 (aldose reductase)                 | 1.33 | 0.0465 |
| <i>Fam91a1</i>      | family with sequence similarity 91, member A1                               | 1.33 | 0.0387 |
| <i>Snf8</i>         | SNF8, ESCRT-II complex subunit                                              | 1.33 | 0.0102 |
| <i>RGD1563100</i>   | similar to KIAA0089                                                         | 1.33 | 0.0349 |
| <i>Inpp4b</i>       | inositol polyphosphate-4-phosphatase, type II                               | 1.33 | 0.0348 |
| <i>Ctxn2</i>        | cortexin 2                                                                  | 1.33 | 0.0374 |
| <i>Foxb1</i>        | forkhead box B1                                                             | 1.33 | 0.0192 |
| <i>Nxnl1</i>        | nucleoredoxin-like 1                                                        | 1.33 | 0.0243 |
| <i>Sugp2</i>        | SURP and G patch domain containing 2                                        | 1.33 | 0.0083 |
| <i>Rbm8a</i>        | RNA binding motif protein 8A                                                | 1.33 | 0.0315 |
| <i>LOC685700</i>    | hypothetical protein LOC685700                                              | 1.33 | 0.0355 |
| <i>Tdgf1</i>        | teratocarcinoma-derived growth factor 1                                     | 1.33 | 0.0474 |
| <i>LOC102552746</i> | uncharacterized LOC102552746                                                | 1.33 | 0.0005 |
| <i>Psmc13</i>       | proteasome 26S subunit, non-ATPase 13                                       | 1.32 | 0.0079 |
| <i>Mtl5</i>         | metallothionein-like 5, testis-specific (tesmin)                            | 1.32 | 0.0172 |
| <i>Itgb3bp</i>      | integrin beta 3 binding protein (beta3-endonexin)                           | 1.32 | 0.0318 |
| <i>Timm50</i>       | translocase of inner mitochondrial membrane 50                              | 1.32 | 0.0419 |
| <i>Gng12</i>        | guanine nucleotide binding protein (G protein), gamma 12                    | 1.32 | 0.0073 |
| <i>Shroom3</i>      | shroom family member 3                                                      | 1.32 | 0.0048 |
| <i>Smim19</i>       | small integral membrane protein 19                                          | 1.32 | 0.0335 |
| <i>Raet1l</i>       | retinoic acid early transcript 1L                                           | 1.32 | 0.0394 |
| <i>LOC316935</i>    | similar to Spetex-2D protein [Source:RGD Symbol;Acc:1586158]                | 1.32 | 0.0045 |
| <i>Tmem56</i>       | transmembrane protein 56                                                    | 1.32 | 0.0038 |
| <i>Tsc22d1</i>      | TSC22 domain family, member 1                                               | 1.32 | 0.0392 |
| <i>LOC100363268</i> | INTERACTS WITH 17alpha-ethynylestradiol (ortholog)                          | 1.32 | 0.0266 |
| <i>Aurkb</i>        | aurora kinase B                                                             | 1.32 | 0.0452 |
| <i>Cdc25c</i>       | cell division cycle 25C                                                     | 1.32 | 0.0213 |
| <i>Ifitm2</i>       | interferon induced transmembrane protein 2                                  | 1.32 | 0.0443 |
| <i>Suv420h2</i>     | suppressor of variegation 4-20 homolog 2 (Drosophila)                       | 1.32 | 0.0414 |
| <i>Cd209c</i>       | CD209c molecule [Source:RGD Symbol;Acc:1582956]                             | 1.32 | 0.0137 |
| <i>Cyp2a1</i>       | cytochrome P450, family 2, subfamily a, polypeptide 1                       | 1.32 | 0.0252 |

|                     |                                                                                                                          |       |        |
|---------------------|--------------------------------------------------------------------------------------------------------------------------|-------|--------|
| <i>Rogdi</i>        | rogdi homolog                                                                                                            | 1.32  | 0.0070 |
| <i>Lypla1</i>       | lysophospholipase I                                                                                                      | 1.32  | 0.0015 |
| <i>Rwdd3</i>        | RWD domain containing 3                                                                                                  | 1.32  | 0.0062 |
| <i>Pilra</i>        | paired immunoglobulin-like type 2 receptor alpha [Source:RGD Symbol;Acc:1562847]                                         | 1.32  | 0.0101 |
| <i>Mmp19</i>        | matrix metalloproteinase 19                                                                                              | 1.32  | 0.0149 |
| <i>Chd9</i>         | chromodomain helicase DNA binding protein 9                                                                              | 1.32  | 0.0446 |
| <i>Entpd7</i>       | ectonucleoside triphosphate diphosphohydrolase 7                                                                         | 1.32  | 0.0468 |
| <i>Fgf6</i>         | fibroblast growth factor 6                                                                                               | 1.32  | 0.0276 |
| <i>Ube2l3</i>       | ubiquitin-conjugating enzyme E2L 3                                                                                       | 1.32  | 0.0161 |
| <i>Hmha1</i>        | histocompatibility (minor) HA-1                                                                                          | 1.32  | 0.0416 |
| <i>Sox18</i>        | SRY (sex determining region Y)-box 18                                                                                    | 1.32  | 0.0195 |
| <i>Gpm6a</i>        | glycoprotein m6a                                                                                                         | 1.32  | 0.0452 |
| <i>Mtdh</i>         | ENCODES a protein that exhibits double-stranded RNA binding (ortholog)                                                   | 1.32  | 0.0045 |
| ---                 | Uncharacterized protein                                                                                                  | 1.32  | 0.0140 |
| <i>Bsph2</i>        | binder of sperm protein homolog 2                                                                                        | 1.31  | 0.0041 |
| <i>Rgs20</i>        | regulator of G-protein signaling 20                                                                                      | 1.31  | 0.0491 |
| <i>Mef2b</i>        | myocyte enhancer factor 2B                                                                                               | 1.31  | 0.0139 |
| <i>Fam212a</i>      | family with sequence similarity 212, member A                                                                            | 1.31  | 0.0120 |
| <i>Upp1</i>         | uridine phosphorylase 1                                                                                                  | 1.31  | 0.0316 |
| <i>Cldn16</i>       | claudin 16                                                                                                               | 1.31  | 0.0163 |
| <i>Tfdp1</i>        | transcription factor Dp-1                                                                                                | 1.31  | 0.0263 |
| <i>Samd9l</i>       | INVOLVED IN common myeloid progenitor cell proliferation (ortholog)                                                      | 1.31  | 0.0335 |
| <i>Mnat1</i>        | MNAT CDK-activating kinase assembly factor 1                                                                             | 1.31  | 0.0238 |
| <i>Tspan7</i>       | tetraspanin 7                                                                                                            | 1.31  | 0.0045 |
| <i>Dgkd</i>         | diacylglycerol kinase, delta                                                                                             | 1.31  | 0.0096 |
| <i>Ppp1r7</i>       | protein phosphatase 1, regulatory subunit 7                                                                              | 1.31  | 0.0188 |
| <i>Exo5</i>         | exonuclease 5                                                                                                            | 1.31  | 0.0092 |
| <i>Npap60</i>       | nuclear pore associated protein [Source:RGD Symbol;Acc:3191]                                                             | 1.31  | 0.0042 |
| <i>LOC100362391</i> | NADH dehydrogenase (ubiquinone) 1 beta subcomplex 3-like [Source:RGD Symbol;Acc:2318296]                                 | 1.31  | 0.0171 |
| <i>Ccdc137</i>      | coiled-coil domain containing 137                                                                                        | 1.31  | 0.0149 |
| <i>Vom2r50</i>      | vomerolateral 2 receptor, 50                                                                                             | 1.31  | 0.0324 |
| <i>Pgbd5</i>        | piggyBac transposable element derived 5                                                                                  | 1.31  | 0.0079 |
| <i>Smtn</i>         | FOUND IN actin cytoskeleton (ortholog) AND nucleus (ortholog) AND INTERACTS WITH C60 fullerene AND cisplatin AND cocaine | 1.31  | 0.0005 |
| <i>Msrb2</i>        | methionine sulfoxide reductase B2                                                                                        | 1.31  | 0.0265 |
| <i>Col20a1</i>      | collagen, type XX, alpha 1                                                                                               | 1.31  | 0.0047 |
| <i>Itih4</i>        | inter-alpha-trypsin inhibitor heavy chain family, member 4                                                               | 1.31  | 0.0043 |
| <i>Ndufc1</i>       | NADH dehydrogenase (ubiquinone) 1, subcomplex unknown, 1 [Source:RGD Symbol;Acc:1586362]                                 | 1.31  | 0.0140 |
| <i>Dhfr</i>         | dihydrofolate reductase                                                                                                  | 1.31  | 0.0007 |
| <i>Mdh2</i>         | malate dehydrogenase 2, NAD (mitochondrial)                                                                              | 1.31  | 0.0331 |
| <i>Hist3h3</i>      | histone cluster 3, H3                                                                                                    | 1.31  | 0.0497 |
| <i>Tax1bp3</i>      | Tax1 (human T-cell leukemia virus type I) binding protein 3                                                              | 1.31  | 0.0460 |
| <i>Adam4</i>        | a disintegrin and metalloprotease domain 4                                                                               | 1.31  | 0.0287 |
| <i>Trub1</i>        | TruB pseudouridine (psi) synthase family member 1                                                                        | 1.31  | 0.0409 |
| <i>Zfp14</i>        | ZFP14 zinc finger protein                                                                                                | 1.31  | 0.0243 |
| <i>Slurp1</i>       | secreted Ly6/Plaur domain containing 1                                                                                   | 1.31  | 0.0486 |
| <i>Wbscr22</i>      | Williams Beuren syndrome chromosome region 22                                                                            | 1.31  | 0.0427 |
| <i>Itgb5</i>        | integrin, beta 5                                                                                                         | 1.31  | 0.0209 |
| <i>Ralgps1</i>      | Ral GEF with PH domain and SH3 binding motif 1                                                                           | 1.31  | 0.0338 |
| <i>Tanc1</i>        | tetratricopeptide repeat, ankyrin repeat and coiled-coil containing 1                                                    | 1.31  | 0.0106 |
| <i>Sipa1</i>        | signal-induced proliferation-associated 1                                                                                | -1.31 | 0.0231 |
| <i>Ctbs</i>         | chitinase, di-N-acetyl-                                                                                                  | -1.31 | 0.0002 |
| <i>Aim1l</i>        | absent in melanoma 1-like                                                                                                | -1.31 | 0.0445 |
| <i>Prss54</i>       | protease, serine, 54                                                                                                     | -1.31 | 0.0277 |
| <i>Rbl2</i>         | retinoblastoma-like 2                                                                                                    | -1.31 | 0.0229 |

|                     |                                                                                           |       |        |
|---------------------|-------------------------------------------------------------------------------------------|-------|--------|
| <i>Usp36</i>        | ubiquitin specific peptidase 36                                                           | -1.31 | 0.0311 |
| <i>Ebna1bp2</i>     | EBNA1 binding protein 2                                                                   | -1.31 | 0.0145 |
| <i>Cox11</i>        | cytochrome c oxidase assembly protein 11                                                  | -1.31 | 0.0432 |
| <i>Ralgapa1</i>     | Ral GTPase activating protein, alpha subunit 1 (catalytic)                                | -1.31 | 0.0075 |
| <i>Ptpn7</i>        | protein tyrosine phosphatase, non-receptor type 7                                         | -1.31 | 0.0390 |
| <i>Cyp2d5</i>       | cytochrome P450, family 2, subfamily d, polypeptide 5                                     | -1.31 | 0.0056 |
| <i>LOC100362690</i> | rCG64164-like                                                                             | -1.31 | 0.0430 |
| <i>Atrn</i>         | attractin                                                                                 | -1.31 | 0.0387 |
| <i>Arfp2</i>        | ADP-ribosylation factor interacting protein 2                                             | -1.31 | 0.0054 |
| <i>LOC100360117</i> | ribosomal protein L8-like                                                                 | -1.31 | 0.0240 |
| <i>Stag1</i>        | stromal antigen 1                                                                         | -1.31 | 0.0158 |
| <i>Pip5k1c</i>      | phosphatidylinositol-4-phosphate 5-kinase, type I, gamma                                  | -1.31 | 0.0499 |
| <i>Olr1606</i>      | olfactory receptor 1606                                                                   | -1.31 | 0.0336 |
| <i>Fn1</i>          | fibronectin 1                                                                             | -1.31 | 0.0061 |
| <i>Smc1a</i>        | structural maintenance of chromosomes 1A                                                  | -1.31 | 0.0095 |
| <i>LOC100910475</i> | uncharacterized LOC100910475                                                              | -1.31 | 0.0340 |
| <i>Rlim</i>         | ring finger protein, LIM domain interacting                                               | -1.31 | 0.0386 |
| <i>Akap8</i>        | A kinase (PRKA) anchor protein 8                                                          | -1.31 | 0.0238 |
| <i>Olr1591</i>      | olfactory receptor 1591                                                                   | -1.31 | 0.0089 |
| <i>Dnajc1</i>       | DnaJ (Hsp40) homolog, subfamily C, member 1                                               | -1.31 | 0.0436 |
| <i>Clec10a</i>      | C-type lectin domain family 10, member A                                                  | -1.31 | 0.0146 |
| <i>Card6</i>        | caspase recruitment domain family, member 6                                               | -1.31 | 0.0246 |
| <i>Rnf145</i>       | ring finger protein 145                                                                   | -1.31 | 0.0477 |
| <i>Cyp2s1</i>       | cytochrome P450, family 2, subfamily s, polypeptide 1                                     | -1.31 | 0.0196 |
| <i>Lysmd3</i>       | LysM, putative peptidoglycan-binding, domain containing 3                                 | -1.31 | 0.0324 |
| <i>LOC100911887</i> | zinc finger protein 569-like                                                              | -1.31 | 0.0446 |
| <i>Wipi2</i>        | WD repeat domain, phosphoinositide interacting 2                                          | -1.31 | 0.0256 |
| <i>Tram1</i>        | translocation associated membrane protein 1                                               | -1.31 | 0.0059 |
| <i>Lag3</i>         | lymphocyte-activation gene 3                                                              | -1.31 | 0.0453 |
| <i>Wdfy2</i>        | WD repeat and FYVE domain containing 2                                                    | -1.31 | 0.0328 |
| <i>Tnks2</i>        | tankyrase, TRF1-interacting ankyrin-related ADP-ribose polymerase 2<br>(Tnks2), mRNA      | -1.31 | 0.0031 |
| <i>Ugdh</i>         | UDP-glucose 6-dehydrogenase                                                               | -1.31 | 0.0113 |
| <i>Zfp239</i>       | zinc finger protein 239 [Source:MGI Symbol;Acc:MGI:1306812]                               | -1.31 | 0.0176 |
| <i>Mpp6</i>         | membrane protein, palmitoylated 6 (MAGUK p55 subfamily member 6)                          | -1.32 | 0.0088 |
| <i>Tcp1</i>         | t-complex 1                                                                               | -1.32 | 0.0000 |
| <i>Tas2r138</i>     | taste receptor, type 2, member 138                                                        | -1.32 | 0.0455 |
| <i>Plrg1</i>        | pleiotropic regulator 1                                                                   | -1.32 | 0.0103 |
| <i>Proc</i>         | protein C                                                                                 | -1.32 | 0.0006 |
| <i>LOC102553533</i> | DDB1- and CUL4-associated factor 5-like                                                   | -1.32 | 0.0113 |
| <i>Slamf6</i>       | SLAM family member 6                                                                      | -1.32 | 0.0365 |
| <i>LOC685718</i>    | similar to tumor protein, translationally-controlled 1 [Source:RGD<br>Symbol;Acc:1590250] | -1.32 | 0.0022 |
| <i>Hoxb3</i>        | homeo box B3                                                                              | -1.32 | 0.0291 |
| <i>Hyal4</i>        | hyaluronoglucosaminidase 4                                                                | -1.32 | 0.0109 |
| <i>Vom2r23</i>      | vomer nasal 2 receptor, 23                                                                | -1.32 | 0.0439 |
| <i>LOC689217</i>    | similar to mRNA capping enzyme (HCE) (MCE1)                                               | -1.32 | 0.0462 |
| <i>Efs</i>          | embryonal Fyn-associated substrate                                                        | -1.32 | 0.0190 |
| <i>Bst1</i>         | bone marrow stromal cell antigen 1                                                        | -1.32 | 0.0134 |
| <i>Mxra7</i>        | matrix-remodelling associated 7                                                           | -1.32 | 0.0030 |
| <i>Ccnd2</i>        | cyclin D2                                                                                 | -1.32 | 0.0160 |
| <i>Epx</i>          | eosinophil peroxidase                                                                     | -1.32 | 0.0348 |
| <i>Eml1</i>         | echinoderm microtubule associated protein like 1                                          | -1.32 | 0.0315 |
| <i>Polr2j</i>       | polymerase (RNA) II (DNA directed) polypeptide J                                          | -1.32 | 0.0346 |
| <i>Dhx37</i>        | DEAH (Asp-Glu-Ala-His) box polypeptide 37                                                 | -1.32 | 0.0474 |
| <i>Rp9</i>          | retinitis pigmentosa 9                                                                    | -1.32 | 0.0471 |
| <i>Map3k2</i>       | mitogen activated protein kinase kinase kinase 2                                          | -1.32 | 0.0225 |
| <i>LOC102553866</i> | zinc finger protein 764-like                                                              | -1.32 | 0.0034 |

|                     |                                                                                                              |       |        |
|---------------------|--------------------------------------------------------------------------------------------------------------|-------|--------|
| <i>Asb18</i>        | ankyrin repeat and SOCS box-containing 18                                                                    | -1.32 | 0.0457 |
| <i>Crisp2</i>       | cysteine-rich secretory protein 2                                                                            | -1.32 | 0.0172 |
| <i>Ccdc109b</i>     | coiled-coil domain containing 109B                                                                           | -1.32 | 0.0461 |
| <i>Faap100</i>      | Fanconi anemia core complex associated protein 100                                                           | -1.32 | 0.0445 |
| <i>Kansl2</i>       | KAT8 regulatory NSL complex subunit 2                                                                        | -1.32 | 0.0023 |
| <i>Klk4</i>         | kallikrein-related peptidase 4                                                                               | -1.32 | 0.0079 |
| <i>RGD1564883</i>   | ENCODES a protein that exhibits structural constituent of ribosome (inferred)                                | -1.32 | 0.0440 |
| <i>Tgm4</i>         | transglutaminase 4                                                                                           | -1.32 | 0.0196 |
| <i>Nlrp1a</i>       | NLR family, pyrin domain containing 1A                                                                       | -1.32 | 0.0329 |
| <i>Lcorl</i>        | ligand dependent nuclear receptor corepressor-like                                                           | -1.32 | 0.0027 |
| <i>Arhgef10l</i>    | Rho guanine nucleotide exchange factor (GEF) 10-like [Source:RGD Symbol;Acc:1585585]                         | -1.32 | 0.0028 |
| <i>Gtpbp4</i>       | GTP binding protein 4                                                                                        | -1.32 | 0.0270 |
| <i>Nrxn3</i>        | neurexin 3                                                                                                   | -1.32 | 0.0012 |
| <i>Senp7</i>        | SUMO1/sentrin specific peptidase 7                                                                           | -1.32 | 0.0342 |
| <i>Zfp318</i>       | zinc finger protein 318                                                                                      | -1.32 | 0.0354 |
| <i>Kdm1a</i>        | lysine (K)-specific demethylase 1A                                                                           | -1.32 | 0.0237 |
| <i>Nup98</i>        | nucleoporin 98                                                                                               | -1.33 | 0.0001 |
| <i>Pigv</i>         | phosphatidylinositol glycan anchor biosynthesis, class V                                                     | -1.33 | 0.0369 |
| <i>Clic5</i>        | chloride intracellular channel 5                                                                             | -1.33 | 0.0088 |
| <i>Olr1733</i>      | olfactory receptor 1733                                                                                      | -1.33 | 0.0298 |
| <i>Otud4</i>        | OTU deubiquitinase 4                                                                                         | -1.33 | 0.0100 |
| <i>Arhgef18</i>     | rho/rac guanine nucleotide exchange factor (GEF) 18                                                          | -1.33 | 0.0282 |
| <i>Dcaf5</i>        | DDB1 and CUL4 associated factor 5                                                                            | -1.33 | 0.0102 |
| <i>Zfp84</i>        | zinc finger protein 84                                                                                       | -1.33 | 0.0134 |
| <i>Zmynd10</i>      | zinc finger, MYND-type containing 10                                                                         | -1.33 | 0.0322 |
| <i>LOC100911260</i> | host cell factor 1-like                                                                                      | -1.33 | 0.0264 |
| <i>LOC102550668</i> | INTERACTS WITH cisplatin (ortholog) AND cobalt dichloride (ortholog) AND copper(2+) sulfate (ortholog)       | -1.33 | 0.0122 |
| <i>LOC102546322</i> | COPII coat assembly protein sec16-like                                                                       | -1.33 | 0.0159 |
| <i>Cadps2</i>       | Ca <sup>++</sup> -dependent secretion activator 2                                                            | -1.33 | 0.0010 |
| <i>Tbpl1</i>        | TBP-like 1                                                                                                   | -1.33 | 0.0012 |
| <i>Sox21</i>        | ENCODES a protein that exhibits DNA binding (ortholog)                                                       | -1.33 | 0.0108 |
| <i>Pou2f2</i>       | POU class 2 homeobox 2                                                                                       | -1.33 | 0.0384 |
| <i>Tmem38b</i>      | transmembrane protein 38B                                                                                    | -1.33 | 0.0285 |
| <i>Plxnb2</i>       | plexin B2                                                                                                    | -1.33 | 0.0337 |
| <i>Olr1451</i>      | ENCODES a protein that exhibits olfactory receptor activity (inferred)                                       | -1.33 | 0.0081 |
| <i>St6galnac6</i>   | ST6 (alpha-N-acetyl-neuraminy1-2,3-beta-galactosyl-1,3)-N-acetylglactosaminide alpha-2,6-sialyltransferase 6 | -1.33 | 0.0198 |
| <i>Cela1</i>        | chymotrypsin-like elastase family, member 1                                                                  | -1.33 | 0.0435 |
| <i>Olr423</i>       | olfactory receptor 423                                                                                       | -1.33 | 0.0462 |
| <i>Apcdd1l</i>      | adenomatosis polyposis coli down-regulated 1-like                                                            | -1.33 | 0.0150 |
| <i>Hirip3</i>       | HIRA interacting protein 3                                                                                   | -1.33 | 0.0122 |
| <i>Prkce</i>        | protein kinase C, epsilon                                                                                    | -1.33 | 0.0208 |
| <i>Chac2</i>        | ChaC, cation transport regulator homolog 2 (E. coli)                                                         | -1.33 | 0.0280 |
| <i>Sec61a1</i>      | Sec61 translocon alpha 1 subunit                                                                             | -1.33 | 0.0076 |
| <i>Dleu2</i>        | deleted in lymphocytic leukemia 2                                                                            | -1.33 | 0.0447 |
| <i>RGD1305733</i>   | similar to RIKEN cDNA 2900011O08                                                                             | -1.33 | 0.0101 |
| <i>Dock9</i>        | dedicator of cytokinesis 9                                                                                   | -1.33 | 0.0120 |
| <i>Gmfb</i>         | glia maturation factor, beta                                                                                 | -1.33 | 0.0400 |
| <i>Dnajc3</i>       | DnaJ (Hsp40) homolog, subfamily C, member 3                                                                  | -1.33 | 0.0262 |
| <i>Atad2b</i>       | ATPase family, AAA domain containing 2B                                                                      | -1.33 | 0.0205 |
| <i>Lrch1</i>        | leucine-rich repeats and calponin homology (CH) domain containing 1                                          | -1.33 | 0.0186 |
| <i>Vps9d1</i>       | VPS9 domain containing 1                                                                                     | -1.33 | 0.0415 |
| <i>Prss29</i>       | protease, serine, 29 [Source:RGD Symbol;Acc:1305856]                                                         | -1.33 | 0.0479 |
| <i>Zfx4</i>         | zinc finger homeobox 4                                                                                       | -1.33 | 0.0319 |
| <i>Porcn</i>        | porcupine homolog (Drosophila)                                                                               | -1.33 | 0.0108 |

|                     |                                                                                   |       |        |
|---------------------|-----------------------------------------------------------------------------------|-------|--------|
| <i>Myo9b</i>        | myosin IXb                                                                        | -1.34 | 0.0479 |
| <i>Ddx56</i>        | DEAD (Asp-Glu-Ala-Asp) box helicase 56                                            | -1.34 | 0.0323 |
| <i>Sox6</i>         | SRY box 6                                                                         | -1.34 | 0.0292 |
| <i>Apcs</i>         | amyloid P component, serum                                                        | -1.34 | 0.0437 |
| <i>Igsf5</i>        | immunoglobulin superfamily, member 5                                              | -1.34 | 0.0091 |
| <i>Znhit6</i>       | zinc finger, HIT-type containing 6                                                | -1.34 | 0.0051 |
| <i>Mphosph8</i>     | M-phase phosphoprotein 8                                                          | -1.34 | 0.0344 |
| <i>Col18a1</i>      | collagen, type XVIII, alpha 1                                                     | -1.34 | 0.0059 |
| <i>Rdh7</i>         | retinol dehydrogenase 7                                                           | -1.34 | 0.0058 |
| <i>Ptprg</i>        | protein tyrosine phosphatase, receptor type, G                                    | -1.34 | 0.0256 |
| <i>Snx10</i>        | sorting nexin 10                                                                  | -1.34 | 0.0034 |
| <i>Olr1621</i>      | olfactory receptor 1621                                                           | -1.34 | 0.0248 |
| <i>Gmppa</i>        | GDP-mannose pyrophosphorylase A                                                   | -1.34 | 0.0401 |
| <i>Pls3</i>         | plastin 3                                                                         | -1.34 | 0.0253 |
| <i>Camkk2</i>       | calcium/calmodulin-dependent protein kinase kinase 2, beta                        | -1.34 | 0.0332 |
| <i>Scn1b</i>        | sodium channel, voltage-gated, type I, beta subunit                               | -1.34 | 0.0408 |
| <i>RGD1307443</i>   | similar to mKIAA0319 protein                                                      | -1.34 | 0.0429 |
| <i>Slc44a5</i>      | solute carrier family 44, member 5                                                | -1.34 | 0.0145 |
| <i>LOC100909934</i> | 60S acidic ribosomal protein P0-like                                              | -1.34 | 0.0109 |
| <i>Sirt1</i>        | Protein Sirt1                                                                     | -1.34 | 0.0026 |
| <i>LOC102555551</i> | uncharacterized LOC102555551                                                      | -1.34 | 0.0206 |
| <i>Scn9a</i>        | sodium channel, voltage-gated, type IX, alpha subunit                             | -1.34 | 0.0175 |
| <i>Upb1</i>         | ureidopropionase, beta                                                            | -1.34 | 0.0044 |
| <i>Syvn1</i>        | synovial apoptosis inhibitor 1, synoviolin                                        | -1.34 | 0.0113 |
| <i>Fam19a4</i>      | family with sequence similarity 19 (chemokine (C-C motif)-like), member A4        | -1.34 | 0.0392 |
| <i>Tfap2c</i>       | transcription factor AP-2 gamma                                                   | -1.34 | 0.0377 |
| <i>Olr1247</i>      | ENCODES a protein that exhibits olfactory receptor activity (inferred)            | -1.34 | 0.0150 |
| <i>Olr1247</i>      | olfactory receptor 1247                                                           | -1.34 | 0.0150 |
| <i>Sox13</i>        | SRY box 13                                                                        | -1.34 | 0.0349 |
| <i>Phkg2</i>        | phosphorylase kinase, gamma 2 (testis)                                            | -1.34 | 0.0024 |
| <i>Epdrl</i>        | ependymin related 1                                                               | -1.34 | 0.0134 |
| <i>Topors</i>       | topoisomerase I binding, arginine/serine-rich, E3 ubiquitin protein ligase        | -1.34 | 0.0020 |
| <i>Pfkip</i>        | phosphofructokinase, platelet                                                     | -1.35 | 0.0240 |
| <i>Ccdc185</i>      | coiled-coil domain containing 185                                                 | -1.35 | 0.0283 |
| <i>Vom1r55</i>      | vomeroneural 1 receptor 55                                                        | -1.35 | 0.0438 |
| <i>Tspan12</i>      | tetraspanin 12                                                                    | -1.35 | 0.0224 |
| <i>Spca2</i>        | signal peptidase complex subunit 2                                                | -1.35 | 0.0195 |
| <i>Olr312</i>       | olfactory receptor 312                                                            | -1.35 | 0.0224 |
| <i>LOC688657</i>    | similar to Olfactory receptor 5D13                                                | -1.35 | 0.0194 |
| <i>Krtap31-1</i>    | keratin associated protein 31-1                                                   | -1.35 | 0.0405 |
| <i>Krt81</i>        | keratin 81, type II                                                               | -1.35 | 0.0290 |
| <i>Smpdl3a</i>      | sphingomyelin phosphodiesterase, acid-like 3A                                     | -1.35 | 0.0301 |
| <i>Dlk1</i>         | delta-like 1 homolog (Drosophila)                                                 | -1.35 | 0.0134 |
| <i>Rplp2</i>        | ribosomal protein, large P2                                                       | -1.35 | 0.0070 |
| <i>Sdc2</i>         | syndecan 2                                                                        | -1.35 | 0.0001 |
| <i>Polr1a</i>       | polymerase (RNA) I polypeptide A                                                  | -1.35 | 0.0204 |
| <i>Spen</i>         | spen family transcriptional repressor                                             | -1.35 | 0.0334 |
| <i>LOC689412</i>    | similar to CG4025-PA                                                              | -1.35 | 0.0450 |
| <i>LOC100910021</i> | phosphatidylinositol 45-bisphosphate 3-kinase catalytic subunit beta isoform-like | -1.35 | 0.0052 |
| <i>Kif24</i>        | kinesin family member 24                                                          | -1.35 | 0.0008 |
| <i>Cops8</i>        | COP9 signalosome subunit 8                                                        | -1.35 | 0.0017 |
| <i>LOC102553962</i> | KRAB domain-containing protein ZNF747-like                                        | -1.35 | 0.0181 |
| <i>LOC100911032</i> | uncharacterized LOC100911032                                                      | -1.35 | 0.0375 |
| <i>Fam183b</i>      | family with sequence similarity 183, member B                                     | -1.35 | 0.0323 |
| <i>Kpna7</i>        | karyopherin alpha 7                                                               | -1.35 | 0.0060 |
| <i>Cd83</i>         | CD83 molecule                                                                     | -1.35 | 0.0357 |
| <i>Epc2</i>         | enhancer of polycomb homolog 2 (Drosophila)                                       | -1.35 | 0.0010 |

|                       |                                                                                                                 |       |        |
|-----------------------|-----------------------------------------------------------------------------------------------------------------|-------|--------|
| <i>Vegfa</i>          | vascular endothelial growth factor A                                                                            | -1.35 | 0.0056 |
| <i>Cep120</i>         | centrosomal protein 120                                                                                         | -1.36 | 0.0165 |
| <i>Ttyh3</i>          | tweety family member 3                                                                                          | -1.36 | 0.0251 |
| <i>Nol8</i>           | nucleolar protein 8                                                                                             | -1.36 | 0.0005 |
| <i>Jmjd1c</i>         | jumonji domain containing 1C                                                                                    | -1.36 | 0.0117 |
| <i>Tango6</i>         | transport and golgi organization 6 homolog                                                                      | -1.36 | 0.0079 |
| <i>Slc33a1</i>        | solute carrier family 33 (acetyl-CoA transporter), member 1                                                     | -1.36 | 0.0137 |
| <i>LOC102552483</i>   | uncharacterized LOC102552483                                                                                    | -1.36 | 0.0034 |
| <i>Hinfp</i>          | histone H4 transcription factor                                                                                 | -1.36 | 0.0202 |
| <i>Acadm</i>          | acyl-CoA dehydrogenase, C-4 to C-12 straight chain                                                              | -1.36 | 0.0180 |
| <i>LOC100912366</i>   | uncharacterized LOC100912366                                                                                    | -1.36 | 0.0443 |
| <i>Bbs9</i>           | INVOLVED IN cilium assembly (ortholog)                                                                          | -1.36 | 0.0326 |
| <i>Slco1a1</i>        | solute carrier organic anion transporter family, member 1a1                                                     | -1.36 | 0.0074 |
| <i>Stim2</i>          | stromal interaction molecule 2                                                                                  | -1.36 | 0.0133 |
| <i>Mfsd8</i>          | major facilitator superfamily domain containing 8                                                               | -1.36 | 0.0246 |
| <i>LOC300308</i>      | similar to hypothetical protein 4930509O22                                                                      | -1.36 | 0.0017 |
| <i>LOC100909486</i>   | putative SMEK homolog 3-like                                                                                    | -1.36 | 0.0019 |
| <i>Fmo6</i>           | flavin containing monooxygenase 6                                                                               | -1.36 | 0.0123 |
| <i>LOC103694381</i>   | lymphotoxin-beta                                                                                                | -1.36 | 0.0250 |
| <i>RGD1559909</i>     | RGD1559909                                                                                                      | -1.36 | 0.0253 |
| <i>AABR07054451.1</i> | ---                                                                                                             | -1.36 | 0.0489 |
| <i>Ube2b</i>          | ubiquitin-conjugating enzyme E2B                                                                                | -1.36 | 0.0082 |
| <i>Pcbp4</i>          | poly(rC) binding protein 4                                                                                      | -1.36 | 0.0472 |
| <i>Pdia6</i>          | protein disulfide isomerase family A, member 6                                                                  | -1.36 | 0.0046 |
| <i>Pik3c3</i>         | phosphatidylinositol 3-kinase, catalytic subunit type 3                                                         | -1.36 | 0.0209 |
| <i>Dnaaf2</i>         | dynein, axonemal, assembly factor 2                                                                             | -1.36 | 0.0447 |
| <i>Arhgap44</i>       | Rho GTPase activating protein 44                                                                                | -1.36 | 0.0221 |
| <i>Zfp131</i>         | zinc finger protein 131                                                                                         | -1.36 | 0.0099 |
| <i>LOC680394</i>      | INTERACTS WITH 2 3 7 8-tetrachlorodibenzodioxine (ortholog)                                                     | -1.36 | 0.0364 |
| <i>Ccdc162</i>        | coiled-coil domain containing 162                                                                               | -1.37 | 0.0315 |
| <i>Dcun1d1</i>        | DCN1, defective in cullin neddylation 1, domain containing 1 ( <i>S. cerevisiae</i> ) ( <i>Dcun1d1</i> ), mRNA. | -1.37 | 0.0156 |
| <i>Ivns1abp</i>       | influenza virus NS1A binding protein                                                                            | -1.37 | 0.0117 |
| <i>Fam179b</i>        | family with sequence similarity 179, member B                                                                   | -1.37 | 0.0272 |
| <i>Tnrc6c</i>         | trinucleotide repeat containing 6C                                                                              | -1.37 | 0.0140 |
| <i>Olr1583</i>        | olfactory receptor 1583                                                                                         | -1.37 | 0.0124 |
| <i>Il6st</i>          | interleukin 6 signal transducer                                                                                 | -1.37 | 0.0033 |
| <i>Nlr4</i>           | NLR family, CARD domain containing 4                                                                            | -1.37 | 0.0047 |
| <i>Pik3cb</i>         | phosphatidylinositol-4,5-bisphosphate 3-kinase, catalytic subunit beta                                          | -1.37 | 0.0007 |
| <i>Slc7a4</i>         | solute carrier family 7, member 4                                                                               | -1.37 | 0.0085 |
| <i>Brd2</i>           | bromodomain containing 2                                                                                        | -1.37 | 0.0108 |
| <i>Nfe2l2</i>         | nuclear factor, erythroid 2-like 2                                                                              | -1.37 | 0.0198 |
| <i>Nt5c3b</i>         | 5-nucleotidase, cytosolic IIIB                                                                                  | -1.37 | 0.0227 |
| <i>Syce3</i>          | synaptonemal complex central element protein 3                                                                  | -1.37 | 0.0080 |
| <i>LOC102547287</i>   | zinc finger protein 728-like                                                                                    | -1.37 | 0.0344 |
| <i>Tmem164</i>        | transmembrane protein 164                                                                                       | -1.37 | 0.0429 |
| <i>Six5</i>           | Protein Six5                                                                                                    | -1.37 | 0.0083 |
| <i>RGD1564149</i>     | similar to Protein C21orf58                                                                                     | -1.37 | 0.0036 |
| <i>Eml4</i>           | echinoderm microtubule associated protein like 4                                                                | -1.37 | 0.0372 |
| <i>LOC100363537</i>   | ribosomal protein L10a-like [Source:RGD Symbol;Acc:2322811]                                                     | -1.37 | 0.0462 |
| ---                   | ---                                                                                                             | -1.37 | 0.0167 |
| <i>Olr505</i>         | olfactory receptor 505                                                                                          | -1.37 | 0.0110 |
| <i>LOC100363408</i>   | INTERACTS WITH all-trans-retinoic acid (ortholog) AND amiodarone (ortholog) AND hydrogen peroxide (ortholog)    | -1.37 | 0.0244 |
| <i>Nlrp12</i>         | NLR family, pyrin domain containing 12                                                                          | -1.37 | 0.0319 |
| <i>Kdm6a</i>          | lysine (K)-specific demethylase 6A                                                                              | -1.37 | 0.0174 |
| <i>Rrnad1</i>         | ribosomal RNA adenine dimethylase domain containing 1                                                           | -1.37 | 0.0297 |



|                     |                                                                                                                     |       |        |
|---------------------|---------------------------------------------------------------------------------------------------------------------|-------|--------|
| <i>Slc7a1</i>       | solute carrier family 7 (cationic amino acid transporter, y+ system), member 1                                      | -1.37 | 0.0293 |
| <i>Tank</i>         | TRAF family member-associated NFKB activator                                                                        | -1.37 | 0.0168 |
| <i>Gja6</i>         | gap junction protein, alpha 6                                                                                       | -1.37 | 0.0378 |
| <i>Olr25</i>        | olfactory receptor 25                                                                                               | -1.38 | 0.0058 |
| <i>Nek3</i>         | NIMA-related kinase 3 [Source:RGD Symbol;Acc:1307419]                                                               | -1.38 | 0.0148 |
| <i>RGD1564614</i>   | similar to complement factor H-related protein                                                                      | -1.38 | 0.0006 |
| <i>Srsf7</i>        | serine/arginine-rich splicing factor 7                                                                              | -1.38 | 0.0115 |
| <i>Jmy</i>          | junction-mediating and regulatory protein                                                                           | -1.38 | 0.0062 |
| <i>Dpyd</i>         | dihydropyrimidine dehydrogenase                                                                                     | -1.38 | 0.0084 |
| <i>Rlf</i>          | rearranged L-myc fusion                                                                                             | -1.38 | 0.0001 |
| <i>Gne</i>          | glucosamine (UDP-N-acetyl)-2-epimerase/N-acetylmannosamine kinase                                                   | -1.38 | 0.0430 |
| <i>Bbs2</i>         | Bardet-Biedl syndrome 2                                                                                             | -1.38 | 0.0295 |
| <i>RGD1565002</i>   | similar to Dehydrogenase/reductase SDR family member 7 precursor (Retinal short-chain dehydrogenase/reductase 4)    | -1.38 | 0.0150 |
| <i>LOC103694398</i> | keratin-associated protein 10-1-like                                                                                | -1.38 | 0.0478 |
| <i>RGD1310257</i>   | similar to RIKEN cDNA 6330408A02 gene                                                                               | -1.38 | 0.0136 |
| <i>Elavl3</i>       | ELAV like neuron-specific RNA binding protein 3                                                                     | -1.38 | 0.0226 |
| <i>Olr1376</i>      | olfactory receptor 1376                                                                                             | -1.38 | 0.0435 |
| <i>Flcn</i>         | folliculin                                                                                                          | -1.38 | 0.0239 |
| <i>Lpo</i>          | lactoperoxidase                                                                                                     | -1.38 | 0.0093 |
| <i>Ldhd</i>         | lactate dehydrogenase D                                                                                             | -1.38 | 0.0347 |
| <i>Klk1c8</i>       | kallikrein 1-related peptidase C8                                                                                   | -1.38 | 0.0055 |
| <i>Trappc6b</i>     | trafficking protein particle complex 6B                                                                             | -1.38 | 0.0079 |
| <i>Oser1</i>        | oxidative stress responsive serine-rich 1                                                                           | -1.38 | 0.0267 |
| <i>Crygd</i>        | crystallin, gamma D                                                                                                 | -1.38 | 0.0387 |
| <i>Zc2hc1c</i>      | zinc finger, C2HC-type containing 1C                                                                                | -1.38 | 0.0474 |
| <i>Os9</i>          | osteosarcoma amplified 9, endoplasmic reticulum lectin                                                              | -1.38 | 0.0013 |
| <i>Slc38a3</i>      | solute carrier family 38, member 3                                                                                  | -1.38 | 0.0030 |
| <i>06. Mrz</i>      | membrane-associated ring finger (C3HC4) 6, E3 ubiquitin protein ligase                                              | -1.38 | 0.0151 |
| <i>ErbB3</i>        | erb-b2 receptor tyrosine kinase 3                                                                                   | -1.38 | 0.0316 |
| <i>Arsb</i>         | arylsulfatase B                                                                                                     | -1.39 | 0.0170 |
| <i>Ccnl1</i>        | cyclin L1                                                                                                           | -1.39 | 0.0229 |
| <i>Sidt1</i>        | SID1 transmembrane family, member 1                                                                                 | -1.39 | 0.0325 |
| <i>Snape1</i>       | small nuclear RNA activating complex, polypeptide 1                                                                 | -1.39 | 0.0054 |
| <i>Rlim</i>         | ring finger protein, LIM domain interacting                                                                         | -1.39 | 0.0127 |
| <i>Antxr2</i>       | anthrax toxin receptor 2                                                                                            | -1.39 | 0.0109 |
| <i>Ctdsp2</i>       | CTD (carboxy-terminal domain, RNA polymerase II, polypeptide A) small phosphatase 2 [Source:RGD Symbol;Acc:2319209] | -1.39 | 0.0489 |
| <i>Tspy12</i>       | TSPY-like 2                                                                                                         | -1.39 | 0.0358 |
| <i>Ly6h</i>         | lymphocyte antigen 6 complex, locus H                                                                               | -1.39 | 0.0019 |
| <i>Iqcb1</i>        | IQ motif containing B1                                                                                              | -1.39 | 0.0050 |
| <i>Sphk1</i>        | sphingosine kinase 1                                                                                                | -1.39 | 0.0050 |
| <i>Whsc1l1</i>      | Wolf-Hirschhorn syndrome candidate 1-like 1                                                                         | -1.39 | 0.0081 |
| <i>Itpr2</i>        | inositol 1,4,5-trisphosphate receptor, type 2                                                                       | -1.39 | 0.0119 |
| <i>Snx20</i>        | sorting nexin 20                                                                                                    | -1.39 | 0.0058 |
| <i>Pros1</i>        | protein S (alpha)                                                                                                   | -1.39 | 0.0004 |
| <i>Tc2n</i>         | tandem C2 domains, nuclear                                                                                          | -1.39 | 0.0198 |
| <i>Tmem63b</i>      | transmembrane protein 63B                                                                                           | -1.39 | 0.0120 |
| <i>RGD1562265</i>   | similar to ribosomal protein S12 [Source:RGD Symbol;Acc:1562265]                                                    | -1.39 | 0.0004 |
| <i>Blcap</i>        | bladder cancer associated protein                                                                                   | -1.39 | 0.0250 |
| <i>Nhlrc2</i>       | NHL repeat containing 2                                                                                             | -1.39 | 0.0490 |
| <i>Dll1</i>         | delta-like 1 (Drosophila)                                                                                           | -1.39 | 0.0333 |
| <i>Dopey2</i>       | dopey family member 2                                                                                               | -1.39 | 0.0035 |
| <i>LOC686677</i>    | similar to olfactory receptor 1161                                                                                  | -1.39 | 0.0239 |
| <i>Ugt2b35</i>      | UDP glucuronosyltransferase 2 family, polypeptide B35                                                               | -1.39 | 0.0019 |
| <i>RT1-T18</i>      | RT1 class Ib, locus T18                                                                                             | -1.39 | 0.0031 |
| <i>Krtap9-1</i>     | keratin associated protein 9-1 [Source:RGD Symbol;Acc:1593000]                                                      | -1.39 | 0.0025 |

|                     |                                                                                                                              |       |        |
|---------------------|------------------------------------------------------------------------------------------------------------------------------|-------|--------|
| <i>Zfp496</i>       | zinc finger protein 496                                                                                                      | -1.40 | 0.0088 |
| <i>Sv2b</i>         | synaptic vesicle glycoprotein 2b                                                                                             | -1.40 | 0.0235 |
| <i>Pink1</i>        | PTEN induced putative kinase 1                                                                                               | -1.40 | 0.0119 |
| <i>Nfat5</i>        | ENCODES a protein that exhibits DNA binding (ortholog)                                                                       | -1.40 | 0.0064 |
| <i>Ccnt1</i>        | cyclin T1                                                                                                                    | -1.40 | 0.0120 |
| <i>Olr1060</i>      | olfactory receptor 1060                                                                                                      | -1.40 | 0.0354 |
| <i>Mef2a</i>        | myocyte enhancer factor 2a                                                                                                   | -1.40 | 0.0046 |
| <i>Cps1</i>         | carbamoyl-phosphate synthetase 1                                                                                             | -1.40 | 0.0034 |
| <i>Brd2</i>         | bromodomain containing 2 [Source:RGD Symbol;Acc:1303324]                                                                     | -1.40 | 0.0364 |
| <i>Gapvd1</i>       | GTPase activating protein and VPS9 domains 1                                                                                 | -1.40 | 0.0019 |
| <i>Tnks2</i>        | tankyrase, TRF1-interacting ankyrin-related ADP-ribose polymerase 2                                                          | -1.40 | 0.0013 |
| <i>Wdsub1</i>       | WD repeat, sterile alpha motif and U-box domain containing 1                                                                 | -1.40 | 0.0142 |
| <i>RGD1560112</i>   | similar to Urinary protein 2 precursor (RUP-2)                                                                               | -1.40 | 0.0131 |
| <i>St8sia3</i>      | ST8 alpha-N-acetyl-neuraminide alpha-2,8-sialyltransferase 3                                                                 | -1.40 | 0.0003 |
| <i>Txndc5</i>       | thioredoxin domain containing 5 (endoplasmic reticulum)                                                                      | -1.40 | 0.0108 |
| <i>Olr1668</i>      | olfactory receptor 1668                                                                                                      | -1.40 | 0.0172 |
| <i>Cpeb4</i>        | cytoplasmic polyadenylation element binding protein 4                                                                        | -1.40 | 0.0384 |
| <i>Gpr55</i>        | G protein-coupled receptor 55                                                                                                | -1.40 | 0.0157 |
| <i>Sec14l2</i>      | SEC14-like lipid binding 2                                                                                                   | -1.40 | 0.0274 |
| <i>LOC102553248</i> | uncharacterized LOC102553248                                                                                                 | -1.40 | 0.0027 |
| <i>Sbp</i>          | spermine binding protein                                                                                                     | -1.40 | 0.0406 |
| <i>Hip1r</i>        | huntingtin interacting protein 1 related                                                                                     | -1.40 | 0.0360 |
| <i>Dnajc25</i>      | DnaJ (Hsp40) homolog, subfamily C, member 25                                                                                 | -1.40 | 0.0048 |
| <i>RT1-A</i>        | RT1 class I, locus A                                                                                                         | -1.40 | 0.0131 |
| <i>Ang</i>          | angiogenin, ribonuclease, RNase A family, 5                                                                                  | -1.40 | 0.0004 |
| <i>Baat</i>         | bile acid CoA:amino acid N-acyltransferase                                                                                   | -1.40 | 0.0003 |
| <i>Olr336</i>       | olfactory receptor 336                                                                                                       | -1.41 | 0.0307 |
| <i>Rnf169</i>       | ring finger protein 169                                                                                                      | -1.41 | 0.0469 |
| <i>Srrd</i>         | SRR1 domain containing                                                                                                       | -1.41 | 0.0081 |
| <i>Ang2</i>         | angiogenin, ribonuclease A family, member 2                                                                                  | -1.41 | 0.0067 |
| <i>Lrrc69</i>       | leucine rich repeat containing 69                                                                                            | -1.41 | 0.0466 |
| <i>LOC500077</i>    | similar to RIKEN cDNA 3110062M04                                                                                             | -1.41 | 0.0200 |
| <i>Rel</i>          | Protein Rel                                                                                                                  | -1.41 | 0.0049 |
| <i>Slc2a8</i>       | solute carrier family 2, (facilitated glucose transporter) member 8                                                          | -1.41 | 0.0085 |
| <i>LOC100359876</i> | ENCODES a protein that exhibits ATP binding (inferred)                                                                       | -1.41 | 0.0468 |
| <i>Tmem43</i>       | transmembrane protein 43                                                                                                     | -1.41 | 0.0468 |
| <i>Cd8a</i>         | CD8a molecule                                                                                                                | -1.41 | 0.0112 |
| <i>Epb41l1</i>      | erythrocyte membrane protein band 4.1-like 1                                                                                 | -1.41 | 0.0127 |
| <i>Abo</i>          | ABO blood group (transferase A, alpha 1-3-N-acetylgalactosaminyltransferase; transferase B, alpha 1-3-galactosyltransferase) | -1.41 | 0.0354 |
| <i>Acox3</i>        | acyl-CoA oxidase 3, pristanoyl                                                                                               | -1.41 | 0.0056 |
| <i>Cyp2g1</i>       | cytochrome P450, family 2, subfamily g, polypeptide 1                                                                        | -1.41 | 0.0047 |
| <i>Sorbs2</i>       | sorbin and SH3 domain containing 2                                                                                           | -1.41 | 0.0455 |
| <i>LOC102550789</i> | RING finger protein C14orf164 homolog                                                                                        | -1.41 | 0.0322 |
| <i>LOC100360157</i> | 1110034B05Rik protein-like                                                                                                   | -1.41 | 0.0419 |
| <i>Impdh2</i>       | IMP (inosine 5-monophosphate) dehydrogenase 2                                                                                | -1.41 | 0.0164 |
| <i>Bin2</i>         | bridging integrator 2                                                                                                        | -1.41 | 0.0126 |
| <i>Arhgap42</i>     | Rho GTPase activating protein 42                                                                                             | -1.41 | 0.0236 |
| <i>Isl2</i>         | ISL LIM homeobox 2                                                                                                           | -1.41 | 0.0018 |
| <i>Capns1</i>       | ENCODES a protein that exhibits calcium-dependent cysteine-type endopeptidase activity                                       | -1.41 | 0.0408 |
| <i>Tgm1</i>         | transglutaminase 1                                                                                                           | -1.41 | 0.0043 |
| <i>Adamts7</i>      | ADAM metallopeptidase with thrombospondin type 1 motif, 7                                                                    | -1.41 | 0.0109 |
| <i>Ogfrl1</i>       | opioid growth factor receptor-like 1                                                                                         | -1.41 | 0.0032 |
| <i>Clip4</i>        | CAP-GLY domain containing linker protein family, member 4                                                                    | -1.41 | 0.0376 |
| <i>Vipr1</i>        | vasoactive intestinal peptide receptor 1                                                                                     | -1.41 | 0.0075 |
| <i>Samt4</i>        | spermatogenesis associated multipass transmembrane protein 4                                                                 | -1.41 | 0.0460 |

|                          |                                                                                                                                            |       |        |
|--------------------------|--------------------------------------------------------------------------------------------------------------------------------------------|-------|--------|
| <i>Abca6</i>             | ATP-binding cassette, subfamily A (ABC1), member 6                                                                                         | -1.41 | 0.0112 |
| <i>Kat2b</i>             | K(lysine) acetyltransferase 2B                                                                                                             | -1.41 | 0.0235 |
| <i>LOC100912024</i>      | uncharacterized LOC100912024 [Source:RGD Symbol;Acc:6489434]                                                                               | -1.42 | 0.0347 |
| <i>LOC102546342</i>      | uncharacterized LOC102546342                                                                                                               | -1.42 | 0.0397 |
| <i>Paics</i>             | phosphoribosylaminoimidazole carboxylase,<br>phosphoribosylaminoimidazole succinocarboxamide synthetase                                    | -1.42 | 0.0085 |
| <i>RGD1565806</i>        | similar to 60S ribosomal protein L23a                                                                                                      | -1.42 | 0.0425 |
| <i>Eqtn</i>              | equatorin, sperm acrosome associated                                                                                                       | -1.42 | 0.0068 |
| <i>Olr1737</i>           | olfactory receptor 1737                                                                                                                    | -1.42 | 0.0235 |
| <i>Dock4</i>             | dedicator of cytokinesis 4 [Source:RGD Symbol;Acc:1561724]                                                                                 | -1.42 | 0.0498 |
| <i>Slc2a12</i>           | solute carrier family 2 (facilitated glucose transporter), member 12                                                                       | -1.42 | 0.0403 |
| ---                      | Uncharacterized protein                                                                                                                    | -1.42 | 0.0175 |
| <i>Srf</i>               | serum response factor                                                                                                                      | -1.42 | 0.0407 |
| <i>Naa25</i>             | N(alpha)-acetyltransferase 25, NatB auxiliary subunit                                                                                      | -1.42 | 0.0050 |
| <i>LOC686084</i>         | similar to CG32580-PA                                                                                                                      | -1.42 | 0.0135 |
| <i>LOC680700</i>         | similar to ribosomal protein L10a [Source:RGD Symbol;Acc:1588266]                                                                          | -1.42 | 0.0346 |
| <i>Fndc3a</i>            | fibronectin type III domain containing 3a                                                                                                  | -1.42 | 0.0007 |
| <i>Nr4a2</i>             | nuclear receptor subfamily 4, group A, member 2                                                                                            | -1.42 | 0.0148 |
| <i>Rbm15</i>             | RNA binding motif protein 15                                                                                                               | -1.42 | 0.0235 |
| <i>Cdkl5</i>             | cyclin-dependent kinase-like 5                                                                                                             | -1.42 | 0.0376 |
| <i>NONMMUG03</i><br>2780 | Non-coding transcript identified by NONCODE: Linc                                                                                          | -1.42 | 0.0301 |
| <i>Tirap</i>             | toll-interleukin 1 receptor (TIR) domain-containing adaptor protein                                                                        | -1.42 | 0.0353 |
| <i>Atp2c1</i>            | ATPase, Ca++ transporting, type 2C, member 1                                                                                               | -1.43 | 0.0159 |
| <i>Tas2r129</i>          | taste receptor, type 2, member 129                                                                                                         | -1.43 | 0.0039 |
| <i>Dip2c</i>             | disco-interacting protein 2 homolog C                                                                                                      | -1.43 | 0.0153 |
| <i>Klrc1</i>             | killer cell lectin-like receptor subfamily C, member 1                                                                                     | -1.43 | 0.0492 |
| <i>Dbnnd2</i>            | dysbindin (dystrobrevin binding protein 1) domain containing 2                                                                             | -1.43 | 0.0267 |
| <i>Gltsr1l</i>           | GLTSCR1-like                                                                                                                               | -1.43 | 0.0123 |
| <i>Agbl1</i>             | ATP/GTP binding protein-like 1 [Source:RGD Symbol;Acc:1560280]                                                                             | -1.43 | 0.0043 |
| <i>Pogk</i>              | pogo transposable element with KRAB domain                                                                                                 | -1.43 | 0.0096 |
| <i>LOC689574</i>         | hypothetical protein LOC689574                                                                                                             | -1.43 | 0.0121 |
| <i>Ssr4</i>              | signal sequence receptor, delta                                                                                                            | -1.43 | 0.0022 |
| <i>Chp1</i>              | calcineurin-like EF-hand protein 1                                                                                                         | -1.43 | 0.0083 |
| <i>Pblld2</i>            | INTERACTS WITH 17beta-estradiol (ortholog) AND 2 3 7 8-<br>tetrachlorodibenzodioxine (ortholog) AND aflatoxin B1 (ortholog)                | -1.43 | 0.0254 |
| <i>Arhgap6</i>           | Rho GTPase activating protein 6                                                                                                            | -1.43 | 0.0091 |
| ---                      | Uncharacterized protein                                                                                                                    | -1.43 | 0.0224 |
| <i>Arl4d</i>             | ADP-ribosylation factor-like 4D                                                                                                            | -1.43 | 0.0053 |
| <i>Apol11a</i>           | apolipoprotein L 11a                                                                                                                       | -1.43 | 0.0241 |
| <i>Klrc3</i>             | killer cell lectin-like receptor subfamily C, member 3                                                                                     | -1.43 | 0.0489 |
| <i>Gramd1c</i>           | GRAM domain containing 1C                                                                                                                  | -1.43 | 0.0245 |
| <i>Dtx1</i>              | deltex 1, E3 ubiquitin ligase                                                                                                              | -1.43 | 0.0127 |
| <i>Zcchc2</i>            | zinc finger, CCHC domain containing 2                                                                                                      | -1.43 | 0.0444 |
| <i>Nr1h4</i>             | nuclear receptor subfamily 1, group H, member 4                                                                                            | -1.43 | 0.0158 |
| <i>Trip13</i>            | thyroid hormone receptor interactor 13                                                                                                     | -1.44 | 0.0243 |
| <i>LOC100910308</i>      | INTERACTS WITH 1-chloro-2 4-dinitrobenzene (ortholog) AND 17beta-<br>estradiol (ortholog) AND 2 3 7 8-tetrachlorodibenzodioxine (ortholog) | -1.44 | 0.0498 |
| <i>Olr1</i>              | oxidized low density lipoprotein (lectin-like) receptor 1                                                                                  | -1.44 | 0.0297 |
| <i>Alox5ap</i>           | arachidonate 5-lipoxygenase activating protein                                                                                             | -1.44 | 0.0108 |
| <i>Ppp2r3a</i>           | protein phosphatase 2, regulatory subunit B, alpha                                                                                         | -1.44 | 0.0079 |
| <i>Olr281</i>            | olfactory receptor 281 (Olr281), mRNA                                                                                                      | -1.44 | 0.0069 |
| <i>Gstm6</i>             | glutathione S-transferase, mu 6                                                                                                            | -1.44 | 0.0050 |
| <i>Rnf40</i>             | ring finger protein 40, E3 ubiquitin protein ligase                                                                                        | -1.44 | 0.0145 |
| <i>RGD1559979</i>        | similar to APH1B homolog (C.elegans)                                                                                                       | -1.44 | 0.0303 |
| <i>Rnf148</i>            | ring finger protein 148                                                                                                                    | -1.44 | 0.0095 |
| <i>Gmeb1</i>             | glucocorticoid modulatory element binding protein 1 (Gmeb1), mRNA.<br>Chalmel, et. al. Testis-expressed Unannotated Transcripts (TUTs)     | -1.44 | 0.0404 |

|                     |                                                                       |       |        |
|---------------------|-----------------------------------------------------------------------|-------|--------|
| <i>Olr964</i>       | olfactory receptor 964                                                | -1.44 | 0.0008 |
| <i>Ppm1l</i>        | protein phosphatase, Mg <sup>2+</sup> /Mn <sup>2+</sup> dependent, 1L | -1.44 | 0.0167 |
| <i>Mafg</i>         | v-maf avian musculoaponeurotic fibrosarcoma oncogene homolog G        | -1.44 | 0.0117 |
| <i>Gk</i>           | glycerol kinase                                                       | -1.44 | 0.0230 |
| <i>Arl5b</i>        | ADP-ribosylation factor-like 5B                                       | -1.44 | 0.0140 |
| <i>LOC100361579</i> | prolactin family 5 subfamily a member 2-like                          | -1.44 | 0.0117 |
| <i>Paxbp1</i>       | PAX3 and PAX7 binding protein 1                                       | -1.44 | 0.0093 |
| <i>Sycp1</i>        | synaptonemal complex protein 1                                        | -1.44 | 0.0255 |
| <i>Tmem246</i>      | transmembrane protein 246                                             | -1.44 | 0.0060 |
| <i>Hs3st3b1</i>     | heparan sulfate (glucosamine) 3-O-sulfotransferase 3B1                | -1.44 | 0.0381 |
| <i>Fzd3</i>         | frizzled class receptor 3                                             | -1.45 | 0.0284 |
| <i>Ang2</i>         | angiogenin, ribonuclease A family, member 2                           | -1.45 | 0.0001 |
| <i>Nkg7</i>         | natural killer cell granule protein 7                                 | -1.45 | 0.0200 |
| <i>Cept1</i>        | choline/ethanolamine phosphotransferase 1                             | -1.45 | 0.0006 |
| <i>Qtrtd1</i>       | Protein Qtrtd1                                                        | -1.45 | 0.0451 |
| <i>Wasf1</i>        | WAS protein family, member 1                                          | -1.45 | 0.0054 |
| <i>Slc35e2b</i>     | solute carrier family 35, member E2B                                  | -1.45 | 0.0166 |
| <i>Dock7</i>        | dedicator of cytokinesis 7                                            | -1.45 | 0.0192 |
| <i>Gclm</i>         | glutamate cysteine ligase, modifier subunit                           | -1.45 | 0.0172 |
| <i>Lpar1</i>        | lysophosphatidic acid receptor 1                                      | -1.45 | 0.0291 |
| <i>Ar</i>           | androgen receptor                                                     | -1.45 | 0.0317 |
| <i>LOC689499</i>    | similar to Y97E10AL.1                                                 | -1.45 | 0.0387 |
| <i>Dhrs3</i>        | dehydrogenase/reductase (SDR family) member 3                         | -1.45 | 0.0436 |
| <i>Rhbd12</i>       | rhomboid, veinlet-like 2 (Drosophila)                                 | -1.45 | 0.0008 |
| <i>Phf19</i>        | PHD finger protein 19                                                 | -1.46 | 0.0403 |
| <i>Pygo2</i>        | pygopus family PHD finger 2                                           | -1.46 | 0.0302 |
| <i>Sgpl1</i>        | sphingosine-1-phosphate lyase 1                                       | -1.46 | 0.0196 |
| <i>Ly49i5</i>       | Ly49 inhibitory receptor 5                                            | -1.46 | 0.0231 |
| <i>Cep112</i>       | centrosomal protein 112kDa                                            | -1.46 | 0.0041 |
| <i>Ctsc</i>         | cathepsin C                                                           | -1.46 | 0.0002 |
| <i>Triap1</i>       | TP53 regulated inhibitor of apoptosis 1                               | -1.46 | 0.0378 |
| <i>Ppp1r2</i>       | protein phosphatase 1, regulatory (inhibitor) subunit 2               | -1.46 | 0.0019 |
| <i>Olr1682</i>      | olfactory receptor 1682                                               | -1.46 | 0.0350 |
| <i>Neo1</i>         | Neogenin                                                              | -1.46 | 0.0126 |
| <i>Ddx39a</i>       | DEAD (Asp-Glu-Ala-Asp) box polypeptide 39A                            | -1.46 | 0.0259 |
| <i>Smc6</i>         | structural maintenance of chromosomes 6                               | -1.46 | 0.0049 |
| <i>Phyh</i>         | phytanoyl-CoA 2-hydroxylase                                           | -1.46 | 0.0147 |
| <i>Rpl18a</i>       | ribosomal protein L18A                                                | -1.46 | 0.0078 |
| <i>LOC102554977</i> | INTERACTS WITH cisplatin (ortholog) AND progesterone (ortholog)       | -1.46 | 0.0293 |
| <i>Olr329</i>       | olfactory receptor 329                                                | -1.46 | 0.0015 |
| <i>Ssfa2</i>        | sperm specific antigen 2                                              | -1.46 | 0.0356 |
| <i>Glod5</i>        | glyoxalase domain containing 5                                        | -1.47 | 0.0442 |
| <i>Cyp4f6</i>       | cytochrome P450, family 4, subfamily f, polypeptide 6                 | -1.47 | 0.0002 |
| <i>Cd302</i>        | CD302 molecule                                                        | -1.47 | 0.0000 |
| <i>Cflar</i>        | CASP8 and FADD-like apoptosis regulator                               | -1.47 | 0.0086 |
| <i>Zfp84</i>        | zinc finger protein 84                                                | -1.47 | 0.0034 |
| <i>Slc50a1</i>      | solute carrier family 50 (sugar efflux transporter), member 1         | -1.47 | 0.0086 |
| <i>Mt4</i>          | metallothionein 4                                                     | -1.47 | 0.0278 |
| <i>Actn2</i>        | actinin alpha 2                                                       | -1.47 | 0.0202 |
| <i>Kmo</i>          | kynurenine 3-monooxygenase (kynurenine 3-hydroxylase)                 | -1.47 | 0.0021 |
| <i>Ripk1</i>        | receptor (TNFRSF)-interacting serine-threonine kinase 1               | -1.47 | 0.0022 |
| <i>Usp1</i>         | ubiquitin specific peptidase 1                                        | -1.47 | 0.0025 |
| <i>Ppp1r15a</i>     | protein phosphatase 1, regulatory subunit 15A                         | -1.47 | 0.0099 |
| <i>Sh2d1a</i>       | SH2 domain containing 1A                                              | -1.47 | 0.0039 |
| <i>Unc79</i>        | INVOLVED IN adult behavior (ortholog)                                 | -1.47 | 0.0246 |
| <i>Fcna</i>         | ficolin A                                                             | -1.47 | 0.0352 |
| <i>Zfp1</i>         | zinc finger protein 1                                                 | -1.47 | 0.0221 |
| <i>RGD1311447</i>   | LOC363276                                                             | -1.47 | 0.0262 |

|                     |                                                                                                                         |       |        |
|---------------------|-------------------------------------------------------------------------------------------------------------------------|-------|--------|
| <i>RGD1565088</i>   | similar to UPF0197 protein C11orf10 homolog                                                                             | -1.47 | 0.0221 |
| <i>Rngtt</i>        | RNA guanylyltransferase and 5-phosphatase                                                                               | -1.47 | 0.0035 |
| <i>RT1-CE10</i>     | RT1 class I, locus CE10                                                                                                 | -1.47 | 0.0249 |
| <i>Lpar2</i>        | lysophosphatidic acid receptor 2                                                                                        | -1.47 | 0.0112 |
| <i>LOC102556148</i> | ENCODES a protein that exhibits N-acetyltransferase activity (inferred)<br>AND INVOLVED IN metabolic process (inferred) | -1.48 | 0.0244 |
| <i>Cd300lf</i>      | Cd300 molecule-like family member F                                                                                     | -1.48 | 0.0078 |
| <i>Rpl22l2</i>      | ribosomal protein L22-like 2 [Source:RGD Symbol;Acc:1590585]                                                            | -1.48 | 0.0151 |
| <i>Atg13</i>        | autophagy related 13                                                                                                    | -1.48 | 0.0059 |
| <i>Eps8l2</i>       | EPS8-like 2                                                                                                             | -1.48 | 0.0413 |
| <i>N4bp2</i>        | NEDD4 binding protein 2                                                                                                 | -1.48 | 0.0128 |
| <i>Ehd3</i>         | EH-domain containing 3                                                                                                  | -1.48 | 0.0222 |
| <i>Ctsl</i>         | cathepsin L                                                                                                             | -1.48 | 0.0249 |
| <i>Il1rapl1</i>     | interleukin 1 receptor accessory protein-like 1                                                                         | -1.48 | 0.0126 |
| <i>Olr1399</i>      | olfactory receptor 1399                                                                                                 | -1.48 | 0.0158 |
| <i>Txndc11</i>      | thioredoxin domain containing 11                                                                                        | -1.48 | 0.0003 |
| <i>Me3</i>          | malic enzyme 3, NADP(+)-dependent, mitochondrial                                                                        | -1.48 | 0.0038 |
| <i>Poglut1</i>      | protein O-glucosyltransferase 1                                                                                         | -1.49 | 0.0008 |
| <i>Susd1</i>        | INTERACTS WITH indole-3-methanol AND thioacetamide AND 2 3 7 8-<br>tetrachlorodibenzodioxine (ortholog)                 | -1.49 | 0.0421 |
| <i>RGD1560556</i>   | similar to C14orf25 protein                                                                                             | -1.49 | 0.0257 |
| <i>Nuggc</i>        | nuclear GTPase, germinal center associated                                                                              | -1.49 | 0.0441 |
| <i>Zfp874b</i>      | zinc finger protein 874b                                                                                                | -1.49 | 0.0334 |
| <i>Abcb4</i>        | ATP-binding cassette, subfamily B (MDR/TAP), member 4                                                                   | -1.49 | 0.0376 |
| <i>C1rl</i>         | complement component 1, r subcomponent-like                                                                             | -1.49 | 0.0007 |
| <i>Dpy19l3</i>      | dpy-19-like 3 (C. elegans)                                                                                              | -1.49 | 0.0284 |
| <i>Taf1c</i>        | TATA box binding protein (Tbp)-associated factor, RNA polymerase I, C                                                   | -1.49 | 0.0061 |
| <i>Ints6</i>        | integrator complex subunit 6                                                                                            | -1.49 | 0.0109 |
| <i>Ipo4</i>         | importin 4                                                                                                              | -1.49 | 0.0031 |
| <i>Slc25a13</i>     | solute carrier family 25 (aspartate/glutamate carrier), member 13<br>[Source:RGD Symbol;Acc:1565889]                    | -1.49 | 0.0001 |
| <i>C6</i>           | complement component 6                                                                                                  | -1.50 | 0.0174 |
| <i>Dbr1</i>         | debranching RNA lariats 1                                                                                               | -1.50 | 0.0033 |
| <i>Ms4a5</i>        | membrane-spanning 4-domains, subfamily A, member 5                                                                      | -1.50 | 0.0319 |
| <i>Lats2</i>        | large tumor suppressor kinase 2                                                                                         | -1.50 | 0.0001 |
| <i>LOC100363171</i> | histone variant H2al2-like                                                                                              | -1.50 | 0.0027 |
| <i>Eif2ak2</i>      | eukaryotic translation initiation factor 2-alpha kinase 2                                                               | -1.50 | 0.0260 |
| <i>Xpnpep3</i>      | X-prolyl aminopeptidase 3, mitochondrial                                                                                | -1.50 | 0.0242 |
| <i>Tcf7l2</i>       | transcription factor 7-like 2 (T-cell specific, HMG-box)                                                                | -1.50 | 0.0354 |
| <i>Olr1242</i>      | olfactory receptor 1242                                                                                                 | -1.51 | 0.0150 |
| <i>Klf12</i>        | Kruppel-like factor 12                                                                                                  | -1.51 | 0.0247 |
| <i>Olr483</i>       | olfactory receptor 483                                                                                                  | -1.51 | 0.0051 |
| <i>Thumpd1</i>      | THUMP domain containing 1                                                                                               | -1.51 | 0.0201 |
| <i>Fam3a</i>        | family with sequence similarity 3, member A                                                                             | -1.51 | 0.0011 |
| <i>Tmem47</i>       | transmembrane protein 47                                                                                                | -1.51 | 0.0023 |
| <i>Oas1i</i>        | 2'-5' oligoadenylate synthetase 1I                                                                                      | -1.51 | 0.0435 |
| <i>Mllt3</i>        | myeloid/lymphoid or mixed-lineage leukemia; translocated to, 3                                                          | -1.51 | 0.0424 |
| <i>Birc2</i>        | baculoviral IAP repeat-containing 2                                                                                     | -1.51 | 0.0115 |
| <i>Ppp2r5e</i>      | protein phosphatase 2, regulatory subunit B, epsilon isoform                                                            | -1.51 | 0.0007 |
| <i>Adgrl2</i>       | adhesion G protein-coupled receptor L2                                                                                  | -1.51 | 0.0051 |
| <i>Nt5e</i>         | 5 nucleotidase, ecto                                                                                                    | -1.51 | 0.0497 |
| <i>Fads6</i>        | fatty acid desaturase 6                                                                                                 | -1.51 | 0.0124 |
| <i>Dram2</i>        | DNA-damage regulated autophagy modulator 2                                                                              | -1.51 | 0.0036 |
| <i>Preli2</i>       | PRELI domain containing 2                                                                                               | -1.51 | 0.0448 |
| <i>Map3k14</i>      | mitogen-activated protein kinase kinase kinase 14                                                                       | -1.51 | 0.0037 |
| <i>Ahctf1</i>       | AT hook containing transcription factor 1                                                                               | -1.51 | 0.0153 |
| <i>Cyp4f39</i>      | cytochrome P450, family 4, subfamily f, polypeptide 39                                                                  | -1.52 | 0.0278 |
| <i>Olr281</i>       | olfactory receptor 281                                                                                                  | -1.52 | 0.0052 |

|                     |                                                                                          |       |        |
|---------------------|------------------------------------------------------------------------------------------|-------|--------|
| <i>Ddost</i>        | dolichyl-diphosphooligosaccharide--protein glycosyltransferase subunit (non-catalytic)   | -1.52 | 0.0006 |
| <i>LOC499136</i>    | LRRGT00021                                                                               | -1.52 | 0.0022 |
| <i>Fshr</i>         | follicle stimulating hormone receptor                                                    | -1.52 | 0.0076 |
| <i>Map4k5</i>       | mitogen-activated protein kinase kinase kinase kinase 5                                  | -1.52 | 0.0031 |
| <i>Alkbh1</i>       | alkB homolog 1, histone H2A dioxygenase                                                  | -1.52 | 0.0112 |
| <i>Usp12</i>        | ubiquitin specific peptidase 12                                                          | -1.52 | 0.0009 |
| <i>Arntl2</i>       | aryl hydrocarbon receptor nuclear translocator-like 2                                    | -1.52 | 0.0368 |
| <i>Nup88</i>        | nucleoporin 88                                                                           | -1.52 | 0.0027 |
| <i>RGD1565410</i>   | similar to Ly6-C antigen gene                                                            | -1.52 | 0.0020 |
| <i>Whamm</i>        | WAS protein homolog associated with actin, golgi membranes and microtubules              | -1.52 | 0.0021 |
| <i>Gstm6l</i>       | glutathione S-transferase, mu 6-like                                                     | -1.52 | 0.0040 |
| <i>Ehbp1</i>        | EH domain binding protein 1                                                              | -1.52 | 0.0133 |
| <i>Ackr2</i>        | atypical chemokine receptor 2                                                            | -1.53 | 0.0203 |
| <i>Nxf2</i>         | nuclear RNA export factor 2                                                              | -1.53 | 0.0007 |
| <i>St3gal1</i>      | ST3 beta-galactoside alpha-2,3-sialyltransferase 1                                       | -1.53 | 0.0353 |
| <i>Krt82</i>        | keratin 82, type II                                                                      | -1.53 | 0.0073 |
| <i>Mapk14</i>       | mitogen activated protein kinase 14                                                      | -1.53 | 0.0007 |
| <i>LOC100909605</i> | serine protease inhibitor A3F-like [Source:RGD Symbol;Acc:6502633]                       | -1.53 | 0.0013 |
| <i>Olr718</i>       | olfactory receptor 718                                                                   | -1.53 | 0.0310 |
| <i>Irf9</i>         | interferon regulatory factor 9                                                           | -1.53 | 0.0094 |
| <i>LOC100909605</i> | serine protease inhibitor A3F-like [Source:RGD Symbol;Acc:6502633]                       | -1.53 | 0.0052 |
| <i>Trak1</i>        | trafficking protein, kinesin binding 1                                                   | -1.53 | 0.0156 |
| <i>Gstm3</i>        | glutathione S-transferase mu 3                                                           | -1.53 | 0.0169 |
| <i>Klkb1</i>        | kallikrein B, plasma 1                                                                   | -1.53 | 0.0004 |
| <i>Fgfr1l</i>       | fibroblast growth factor receptor-like 1                                                 | -1.53 | 0.0470 |
| <i>Nmnat1</i>       | nicotinamide nucleotide adenylyltransferase 1                                            | -1.53 | 0.0137 |
| <i>Osbpl8</i>       | oxysterol binding protein-like 8                                                         | -1.53 | 0.0009 |
| <i>Aim2</i>         | absent in melanoma 2                                                                     | -1.53 | 0.0151 |
| <i>Ccdc117</i>      | coiled-coil domain containing 117                                                        | -1.54 | 0.0190 |
| <i>Lrg1</i>         | leucine-rich alpha-2-glycoprotein 1                                                      | -1.54 | 0.0248 |
| <i>Dmxl2</i>        | Dmx-like 2                                                                               | -1.54 | 0.0231 |
| <i>Zbtb43</i>       | zinc finger and BTB domain containing 43                                                 | -1.54 | 0.0060 |
| <i>Crtc3</i>        | CREB regulated transcription coactivator 3                                               | -1.54 | 0.0053 |
| <i>Cyyr1</i>        | cysteine/tyrosine-rich 1                                                                 | -1.54 | 0.0480 |
| <i>LOC680200</i>    | similar to zinc finger protein 455                                                       | -1.54 | 0.0135 |
| <i>Hlcs</i>         | holocarboxylase synthetase (biotin-(propionyl-CoA-carboxylase (ATP-hydrolysing)) ligase) | -1.54 | 0.0157 |
| <i>Tmx4</i>         | thioredoxin-related transmembrane protein 4                                              | -1.54 | 0.0176 |
| <i>Mov10l1</i>      | Mov10 RISC complex RNA helicase like 1                                                   | -1.54 | 0.0013 |
| <i>Ctdspl</i>       | CTD (carboxy-terminal domain, RNA polymerase II, polypeptide A) small phosphatase-like   | -1.55 | 0.0316 |
| <i>Tymp</i>         | thymidine phosphorylase                                                                  | -1.55 | 0.0026 |
| <i>Mad2l1bp</i>     | MAD2L1 binding protein                                                                   | -1.55 | 0.0064 |
| <i>Slc10a2</i>      | solute carrier family 10 (sodium/bile acid cotransporter), member 2                      | -1.55 | 0.0432 |
| <i>Nrxn1</i>        | neurexin 1                                                                               | -1.55 | 0.0471 |
| <i>RGD1560203</i>   | Protein RGD1560203                                                                       | -1.55 | 0.0304 |
| <i>Mid1</i>         | midline 1                                                                                | -1.55 | 0.0019 |
| <i>Dlc1</i>         | DLC1 Rho GTPase activating protein                                                       | -1.55 | 0.0012 |
| <i>Hsd3b5</i>       | hydroxy-delta-5-steroid dehydrogenase, 3 beta- and steroid delta-isomerase 5             | -1.55 | 0.0127 |
| <i>Prg4</i>         | proteoglycan 4                                                                           | -1.55 | 0.0053 |
| <i>Cks1b</i>        | CDC28 protein kinase regulatory subunit 1B                                               | -1.55 | 0.0471 |
| <i>Pkmyt1</i>       | protein kinase, membrane associated tyrosine/threonine 1                                 | -1.55 | 0.0032 |
| <i>Yipf2</i>        | Yip1 domain family, member 2                                                             | -1.55 | 0.0077 |
| <i>Rbms1</i>        | RNA binding motif, single stranded interacting protein 1                                 | -1.55 | 0.0024 |
| <i>Cyb5a</i>        | cytochrome b5 type A (microsomal)                                                        | -1.56 | 0.0169 |

|                     |                                                                                                     |       |        |
|---------------------|-----------------------------------------------------------------------------------------------------|-------|--------|
| <i>Hsp90b1</i>      | heat shock protein 90, beta, member 1                                                               | -1.56 | 0.0066 |
| <i>Rbpj</i>         | recombination signal binding protein for immunoglobulin kappa J region                              | -1.56 | 0.0033 |
| <i>Mrpl14</i>       | mitochondrial ribosomal protein L14                                                                 | -1.56 | 0.0138 |
| <i>Atxn1l</i>       | ataxin 1-like                                                                                       | -1.56 | 0.0069 |
| <i>Mboat1</i>       | membrane bound O-acyltransferase domain containing 1                                                | -1.56 | 0.0227 |
| <i>Olr1450</i>      | olfactory receptor 1450                                                                             | -1.56 | 0.0136 |
| <i>Ly6c</i>         | Ly6-C antigen                                                                                       | -1.56 | 0.0367 |
| <i>Hsd3b1</i>       | hydroxy-delta-5-steroid dehydrogenase, 3 beta- and steroid delta-isomerase 6 (Hsd3b6), mRNA         | -1.56 | 0.0110 |
| <i>Sod3</i>         | superoxide dismutase 3, extracellular                                                               | -1.57 | 0.0176 |
| <i>Lyzl1</i>        | lysozyme-like 1                                                                                     | -1.57 | 0.0162 |
| <i>LOC100910689</i> | cytochrome c oxidase assembly protein COX11, mitochondrial-like [Source:RGD Symbol;Acc:6497536]     | -1.57 | 0.0031 |
| <i>RGD1308706</i>   | similar to RIKEN cDNA 4921524J17                                                                    | -1.57 | 0.0151 |
| <i>Nedd4l</i>       | neural precursor cell expressed, developmentally down-regulated 4-like, E3 ubiquitin protein ligase | -1.57 | 0.0031 |
| <i>Agmat</i>        | agmatine ureohydrolase (agmatinase)                                                                 | -1.57 | 0.0082 |
| <i>Cysltr1</i>      | cysteinyl leukotriene receptor 1                                                                    | -1.57 | 0.0116 |
| <i>Pon3</i>         | paraoxonase 3                                                                                       | -1.57 | 0.0030 |
| <i>Stard4</i>       | StAR-related lipid transfer (START) domain containing 4                                             | -1.58 | 0.0237 |
| <i>Il18r1</i>       | interleukin 18 receptor 1                                                                           | -1.58 | 0.0235 |
| <i>Slc9a7</i>       | solute carrier family 9, subfamily A (NHE7, cation proton antiporter 7), member 7                   | -1.58 | 0.0115 |
| <i>Gnl3</i>         | guanine nucleotide binding protein-like 3 (nucleolar)                                               | -1.58 | 0.0080 |
| <i>Tmem150c</i>     | transmembrane protein 150C                                                                          | -1.59 | 0.0344 |
| <i>LOC102550998</i> | sperm motility kinase 3-like                                                                        | -1.59 | 0.0133 |
| <i>Rsrp1</i>        | arginine/serine-rich protein 1                                                                      | -1.59 | 0.0010 |
| <i>Runx1t1</i>      | runt-related transcription factor 1; translocated to, 1 (cyclin D-related)                          | -1.59 | 0.0277 |
| <i>Trpm6</i>        | transient receptor potential cation channel, subfamily M, member 6                                  | -1.59 | 0.0267 |
| <i>Hsd3b7</i>       | hydroxy-delta-5-steroid dehydrogenase, 3 beta- and steroid delta-isomerase 7                        | -1.59 | 0.0154 |
| <i>Nkrf</i>         | Protein LOC100910054                                                                                | -1.59 | 0.0007 |
| <i>Maob</i>         | monoamine oxidase B                                                                                 | -1.59 | 0.0005 |
| <i>LOC102551852</i> | keratin-associated protein 20-2-like                                                                | -1.60 | 0.0044 |
| <i>Nfyb</i>         | nuclear transcription factor-Y beta                                                                 | -1.60 | 0.0263 |
| <i>Mef2d</i>        | myocyte enhancer factor 2D                                                                          | -1.60 | 0.0165 |
| <i>Cyp4f1</i>       | cytochrome P450, family 4, subfamily f, polypeptide 1                                               | -1.60 | 0.0001 |
| <i>LOC102548360</i> | MLV-related proviral Env polypeptide-like                                                           | -1.60 | 0.0184 |
| <i>Hao1</i>         | hydroxyacid oxidase (glycolate oxidase) 1                                                           | -1.60 | 0.0010 |
| <i>LOC690478</i>    | similar to keratin associated protein 10-7                                                          | -1.60 | 0.0225 |
| <i>Ces1e</i>        | ENCODS a protein that exhibits palmitoyl-CoA hydrolase activity                                     | -1.60 | 0.0070 |
| <i>Ier2</i>         | immediate early response 2                                                                          | -1.60 | 0.0392 |
| <i>Stard13</i>      | StAR-related lipid transfer (START) domain containing 13                                            | -1.61 | 0.0183 |
| <i>Cers3</i>        | ceramide synthase 3                                                                                 | -1.61 | 0.0201 |
| <i>Eif4b</i>        | eukaryotic translation initiation factor 4B                                                         | -1.61 | 0.0063 |
| <i>RGD1309821</i>   | similar to KIAA1161 protein                                                                         | -1.61 | 0.0010 |
| <i>LOC360919</i>    | similar to alpha-fetoprotein                                                                        | -1.61 | 0.0110 |
| <i>Ddc</i>          | dopa decarboxylase (aromatic L-amino acid decarboxylase)                                            | -1.61 | 0.0171 |
| <i>LOC102551659</i> | MLV-related proviral Env polypeptide-like                                                           | -1.61 | 0.0030 |
| <i>Med13</i>        | mediator complex subunit 13                                                                         | -1.61 | 0.0114 |
| <i>Ets2</i>         | v-ets avian erythroblastosis virus E26 oncogene homolog 2                                           | -1.62 | 0.0368 |
| <i>Hbegf</i>        | heparin-binding EGF-like growth factor                                                              | -1.62 | 0.0155 |
| <i>Prf1</i>         | perforin 1 (pore forming protein)                                                                   | -1.62 | 0.0012 |
| <i>Mettl7a</i>      | methyltransferase like 7A                                                                           | -1.62 | 0.0157 |
| <i>LOC100361702</i> | keratin associated protein 12-1-like                                                                | -1.62 | 0.0106 |
| <i>Dusp26</i>       | dual specificity phosphatase 26 (putative)                                                          | -1.62 | 0.0228 |
| <i>Enpp1</i>        | ectonucleotide pyrophosphatase/phosphodiesterase 1                                                  | -1.62 | 0.0058 |
| <i>Ppp1r3g</i>      | protein phosphatase 1, regulatory subunit 3G                                                        | -1.62 | 0.0072 |

|                     |                                                                                                                                   |       |        |
|---------------------|-----------------------------------------------------------------------------------------------------------------------------------|-------|--------|
| <i>Igf1</i>         | insulin-like growth factor 1                                                                                                      | -1.63 | 0.0001 |
| <i>Ccl5</i>         | chemokine (C-C motif) ligand 5                                                                                                    | -1.63 | 0.0277 |
| <i>Igfbp4</i>       | insulin-like growth factor binding protein 4                                                                                      | -1.63 | 0.0488 |
| <i>Pcdh1</i>        | Protein Pcdh1                                                                                                                     | -1.64 | 0.0027 |
| <i>LOC691280</i>    | similar to Zinc finger protein 180 (HHZ168)                                                                                       | -1.64 | 0.0072 |
| <i>Cgrrf1</i>       | cell growth regulator with ring finger domain 1                                                                                   | -1.64 | 0.0007 |
| <i>Aph1b</i>        | APH1B gamma secretase subunit                                                                                                     | -1.64 | 0.0023 |
| <i>RGD1565566</i>   | similar to 60S ribosomal protein L18a [Source:RGD Symbol;Acc:1565566]                                                             | -1.65 | 0.0217 |
| <i>Mcm7</i>         | minichromosome maintenance complex component 7                                                                                    | -1.65 | 0.0037 |
| <i>Glyatl1</i>      | glycine-N-acyltransferase-like 1                                                                                                  | -1.65 | 0.0029 |
| <i>Olr181</i>       | olfactory receptor 181                                                                                                            | -1.65 | 0.0077 |
| <i>Lpar3</i>        | lysophosphatidic acid receptor 3                                                                                                  | -1.65 | 0.0176 |
| <i>LOC102552619</i> | INTERACTS WITH cobalt dichloride (ortholog) AND crocidolite asbestos (ortholog) AND methyl methanesulfonate (ortholog)            | -1.66 | 0.0026 |
| <i>Pax3</i>         | paired box 3                                                                                                                      | -1.66 | 0.0026 |
| <i>Hpd</i>          | 4-hydroxyphenylpyruvate dioxygenase                                                                                               | -1.66 | 0.0040 |
| <i>Apoa5</i>        | apolipoprotein A-V                                                                                                                | -1.66 | 0.0048 |
| <i>Ankrd27</i>      | ankyrin repeat domain 27 (VPS9 domain)                                                                                            | -1.67 | 0.0025 |
| <i>Hoxa2</i>        | homeo box A2                                                                                                                      | -1.67 | 0.0420 |
| <i>Cyp2j3</i>       | cytochrome P450, family 2, subfamily j, polypeptide 3                                                                             | -1.67 | 0.0169 |
| <i>Igfals</i>       | insulin-like growth factor binding protein, acid labile subunit                                                                   | -1.68 | 0.0244 |
| <i>RGD1306091</i>   | PREDICTED: similar to Mixed lineage kinase 4 (RGD1306091), mRNA. Chalmel, et. al. Testis-expressed Unannotated Transcripts (TUTs) | -1.68 | 0.0161 |
| <i>LOC102551832</i> | MLV-related proviral Env polyprotein-like                                                                                         | -1.68 | 0.0078 |
| <i>Omd</i>          | osteomodulin (Omd), mRNA                                                                                                          | -1.68 | 0.0102 |
| <i>Pik3c2g</i>      | phosphatidylinositol-4-phosphate 3-kinase, catalytic subunit type 2 gamma                                                         | -1.68 | 0.0072 |
| <i>Tfcp2</i>        | transcription factor CP2                                                                                                          | -1.68 | 0.0002 |
| <i>RGD1561986</i>   | INTERACTS WITH 17beta-hydroxy-17-methylestra-4 9 11-trien-3-one (ortholog)                                                        | -1.69 | 0.0276 |
| <i>Banp</i>         | Btg3 associated nuclear protein                                                                                                   | -1.69 | 0.0026 |
| <i>Slc7a2</i>       | solute carrier family 7 (cationic amino acid transporter, y+ system), member 2                                                    | -1.69 | 0.0250 |
| <i>Cyp3a62</i>      | cytochrome P450, family 3, subfamily a, polypeptide 62                                                                            | -1.69 | 0.0100 |
| <i>Cldn2</i>        | claudin 2                                                                                                                         | -1.69 | 0.0435 |
| <i>Irs1</i>         | insulin receptor substrate 1                                                                                                      | -1.69 | 0.0049 |
| <i>Slc21a4</i>      | kidney specific organic anion transporter                                                                                         | -1.69 | 0.0111 |
| <i>A2m</i>          | alpha-2-macroglobulin                                                                                                             | -1.70 | 0.0024 |
| <i>Lect2</i>        | leukocyte cell-derived chemotaxin 2                                                                                               | -1.70 | 0.0017 |
| <i>RGD1564074</i>   | similar to novel protein [Source:RGD Symbol;Acc:1564074]                                                                          | -1.70 | 0.0295 |
| <i>Hectd2</i>       | HECT domain containing E3 ubiquitin protein ligase 2                                                                              | -1.71 | 0.0078 |
| <i>Foxp1</i>        | forkhead box P1                                                                                                                   | -1.71 | 0.0021 |
| <i>Setd1b</i>       | SET domain containing 1B [Source:MGI Symbol;Acc:MGI:2652820]                                                                      | -1.71 | 0.0073 |
| <i>Lrp6</i>         | low density lipoprotein receptor-related protein 6                                                                                | -1.71 | 0.0010 |
| <i>Sez6</i>         | seizure related 6 homolog (mouse)                                                                                                 | -1.71 | 0.0345 |
| <i>Als2</i>         | amyotrophic lateral sclerosis 2 (juvenile)                                                                                        | -1.71 | 0.0011 |
| <i>Tmem163</i>      | transmembrane protein 163                                                                                                         | -1.71 | 0.0134 |
| <i>Zswim1</i>       | zinc finger, SWIM-type containing 1                                                                                               | -1.71 | 0.0005 |
| <i>Ankrd33b</i>     | ankyrin repeat domain 33B                                                                                                         | -1.71 | 0.0004 |
| <i>Acss3</i>        | acyl-CoA synthetase short-chain family member 3                                                                                   | -1.71 | 0.0015 |
| <i>Hdac2</i>        | histone deacetylase 2                                                                                                             | -1.72 | 0.0060 |
| <i>LOC102549637</i> | filaggrin-2-like                                                                                                                  | -1.72 | 0.0213 |
| <i>Omd</i>          | osteomodulin                                                                                                                      | -1.72 | 0.0057 |
| <i>Rdh16</i>        | ENCODS a protein that exhibits retinol dehydrogenase activity                                                                     | -1.73 | 0.0013 |
| <i>Kdelc2</i>       | KDEL (Lys-Asp-Glu-Leu) containing 2                                                                                               | -1.73 | 0.0046 |
| <i>Gjb1</i>         | gap junction protein, beta 1                                                                                                      | -1.73 | 0.0000 |
| <i>Pla2g12a</i>     | phospholipase A2, group XIIA                                                                                                      | -1.73 | 0.0234 |
| <i>LOC102552117</i> | MLV-related proviral Env polyprotein-like                                                                                         | -1.73 | 0.0179 |
| <i>Mcts2</i>        | malignant T cell amplified sequence 2                                                                                             | -1.74 | 0.0142 |



|                        |                                                                                          |       |        |
|------------------------|------------------------------------------------------------------------------------------|-------|--------|
| <i>Ifitm7</i>          | interferon induced transmembrane protein 7 [Source:RGD Symbol;Acc:1306466]               | -1.74 | 0.0010 |
| <i>Clstn1</i>          | calsyntenin 1                                                                            | -1.75 | 0.0031 |
| <i>Grb7</i>            | growth factor receptor bound protein 7                                                   | -1.75 | 0.0330 |
| <i>Xk</i>              | X-linked Kx blood group                                                                  | -1.76 | 0.0022 |
| <i>Gpd2</i>            | glycerol-3-phosphate dehydrogenase 2                                                     | -1.76 | 0.0326 |
| <i>S1pr2</i>           | sphingosine-1-phosphate receptor 2                                                       | -1.76 | 0.0001 |
| <i>Rnd2</i>            | Rho family GTPase 2                                                                      | -1.76 | 0.0057 |
| <i>Dnajc18</i>         | DnaJ (Hsp40) homolog, subfamily C, member 18                                             | -1.77 | 0.0114 |
| <i>Atp11a</i>          | ATPase, class VI, type 11A                                                               | -1.78 | 0.0000 |
| <i>Zfp69</i>           | zinc finger protein 69 [Source:RGD Symbol;Acc:2322990]                                   | -1.78 | 0.0131 |
| <i>Ddb2</i>            | damage specific DNA binding protein 2                                                    | -1.79 | 0.0020 |
| <i>NEWGENE_1585613</i> | ADP-ribosylation factor-like 14                                                          | -1.80 | 0.0087 |
| <i>Fv1</i>             | Friend virus susceptibility 1                                                            | -1.80 | 0.0000 |
| <i>Prrg1</i>           | proline rich Gla (G-carboxyglutamic acid) 1                                              | -1.80 | 0.0196 |
| <i>Gstm2</i>           | glutathione S-transferase mu 2                                                           | -1.80 | 0.0057 |
| <i>Ablim3</i>          | actin binding LIM protein family, member 3                                               | -1.80 | 0.0307 |
| <i>Loxl4</i>           | lysyl oxidase-like 4                                                                     | -1.81 | 0.0017 |
| <i>Cyp3a23/3a1</i>     | cytochrome P450, family 3, subfamily a, polypeptide 23/polypeptide 1 (Cyp3a23/3a1), mRNA | -1.81 | 0.0004 |
| <i>Cyp3a23/3a1</i>     | cytochrome P450, family 3, subfamily a, polypeptide 23/polypeptide 1                     | -1.81 | 0.0004 |
| <i>Aph1b</i>           | APH1B gamma secretase subunit                                                            | -1.81 | 0.0028 |
| <i>Ptger3</i>          | prostaglandin E receptor 3 (subtype EP3)                                                 | -1.81 | 0.0163 |
| <i>F11</i>             | coagulation factor XI                                                                    | -1.81 | 0.0001 |
| <i>Fam117b</i>         | family with sequence similarity 117, member B                                            | -1.81 | 0.0036 |
| <i>Spice1</i>          | spindle and centriole associated protein 1                                               | -1.82 | 0.0053 |
| <i>Cyp7b1</i>          | cytochrome P450, family 7, subfamily b, polypeptide 1                                    | -1.82 | 0.0434 |
| <i>Prkaa2</i>          | protein kinase, AMP-activated, alpha 2 catalytic subunit                                 | -1.82 | 0.0006 |
| <i>Zfp57</i>           | zinc finger protein 57                                                                   | -1.83 | 0.0266 |
| <i>Agt</i>             | angiotensinogen (serpin peptidase inhibitor, clade A, member 8)                          | -1.83 | 0.0003 |
| <i>Mreg</i>            | melanoregulin                                                                            | -1.83 | 0.0001 |
| <i>Tbc1d14</i>         | TBC1 domain family, member 14                                                            | -1.84 | 0.0002 |
| <i>Siglech</i>         | sialic acid binding Ig-like lectin H [Source:RGD Symbol;Acc:1310401]                     | -1.85 | 0.0022 |
| <i>Dab1</i>            | Dab, reelin signal transducer, homolog 1 (Drosophila)                                    | -1.85 | 0.0169 |
| <i>Gsap</i>            | gamma-secretase activating protein                                                       | -1.85 | 0.0010 |
| <i>Phtf1</i>           | putative homeodomain transcription factor 1                                              | -1.86 | 0.0001 |
| <i>LOC100910501</i>    | ENCODES a protein that exhibits aminopeptidase activity (ortholog)                       | -1.86 | 0.0114 |
| <i>Tstd1</i>           | thiosulfate sulfurtransferase (rhodanese)-like domain containing 1                       | -1.86 | 0.0014 |
| <i>LOC299282</i>       | Serine protease inhibitor                                                                | -1.87 | 0.0018 |
| <i>RGD1566035</i>      | similar to protein tyrosine phosphatase 4a1                                              | -1.87 | 0.0040 |
| <i>LOC102552246</i>    | uncharacterized LOC102552246                                                             | -1.88 | 0.0046 |
| <i>LOC681366</i>       | ENCODES a protein that exhibits oxidoreductase activity (inferred)                       | -1.88 | 0.0040 |
| <i>Aox4</i>            | aldehyde oxidase 4                                                                       | -1.89 | 0.0001 |
| <i>Car8</i>            | carbonic anhydrase 8                                                                     | -1.90 | 0.0001 |
| <i>Slc25a15</i>        | solute carrier family 25 (mitochondrial carrier; ornithine transporter) member 15        | -1.90 | 0.0033 |
| <i>Dnajb9</i>          | DnaJ (Hsp40) homolog, subfamily B, member 9                                              | -1.90 | 0.0179 |
| <i>Hacl1</i>           | 2-hydroxyacyl-CoA lyase 1                                                                | -1.90 | 0.0303 |
| <i>Itga6</i>           | integrin, alpha 6                                                                        | -1.90 | 0.0071 |
| <i>LOC500124</i>       | similar to RIKEN cDNA 4921507P07                                                         | -1.92 | 0.0170 |
| <i>Tob1</i>            | transducer of ErbB-2.1                                                                   | -1.92 | 0.0135 |
| <i>Meiob</i>           | meiosis specific with OB domains                                                         | -1.92 | 0.0228 |
| <i>Sat2</i>            | spermidine/spermine N1-acetyltransferase family member 2                                 | -1.92 | 0.0073 |
| <i>Foxp2</i>           | forkhead box P2                                                                          | -1.93 | 0.0342 |
| <i>Casp6</i>           | caspase 6 (Casp6), transcript variant 2, mRNA.                                           | -1.93 | 0.0057 |
| <i>RGD1309362</i>      | similar to interferon-inducible GTPase                                                   | -1.94 | 0.0233 |
| <i>Pdgfc</i>           | platelet derived growth factor C                                                         | -1.94 | 0.0010 |

|                           |                                                                                                                                   |       |        |
|---------------------------|-----------------------------------------------------------------------------------------------------------------------------------|-------|--------|
| <i>Rup2</i>               | urinary protein 2                                                                                                                 | -1.94 | 0.0000 |
| <i>Dio1</i>               | deiodinase, iodothyronine, type I                                                                                                 | -1.94 | 0.0058 |
| <i>Efna5</i>              | ephrin A5                                                                                                                         | -1.96 | 0.0096 |
| <i>Sox5</i>               | SRY (sex determining region Y)-box 5                                                                                              | -1.96 | 0.0002 |
| <i>Plekhb1</i>            | pleckstrin homology domain containing, family B (evectins) member 1                                                               | -1.97 | 0.0129 |
| <i>LOC102549198</i>       | interferon-inducible GTPase 1-like                                                                                                | -1.97 | 0.0406 |
| <i>LOC102549203</i>       | uncharacterized LOC102549203                                                                                                      | -1.98 | 0.0018 |
| <i>RGD1565590</i>         | INTERACTS WITH thioacetamide                                                                                                      | -1.99 | 0.0450 |
| <i>Sh3bp5</i>             | SH3-domain binding protein 5 (BTK-associated)                                                                                     | -1.99 | 0.0014 |
| <i>LOC102549464</i>       | TBC1 domain family member 14-like                                                                                                 | -2.00 | 0.0005 |
| <i>ENSMUSG00000028542</i> | solute carrier family 6 (neurotransmitter transporter, glycine), member 9, Non-coding transcript identified by NONCODE: Antisense | -2.01 | 0.0001 |
| <i>Cdh2</i>               | cadherin 2                                                                                                                        | -2.01 | 0.0005 |
| <i>Cyp2e1</i>             | cytochrome P450, family 2, subfamily e, polypeptide 1                                                                             | -2.01 | 0.0083 |
| <i>Pdzd4</i>              | PDZ domain containing 4                                                                                                           | -2.01 | 0.0019 |
| <i>Hyls1</i>              | hydrolethalus syndrome 1                                                                                                          | -2.01 | 0.0190 |
| <i>Apon</i>               | apolipoprotein N                                                                                                                  | -2.02 | 0.0005 |
| <i>Acsl4</i>              | acyl-CoA synthetase long-chain family member 4                                                                                    | -2.03 | 0.0031 |
| <i>Enpep</i>              | glutamyl aminopeptidase                                                                                                           | -2.03 | 0.0025 |
| <i>Dtx3l</i>              | deltex 3 like, E3 ubiquitin ligase                                                                                                | -2.03 | 0.0000 |
| <i>Pid1</i>               | phosphotyrosine interaction domain containing 1                                                                                   | -2.03 | 0.0071 |
| <i>Aph1b</i>              | APH1B gamma secretase subunit (Aph1b), mRNA                                                                                       | -2.04 | 0.0037 |
| <i>Zfp37</i>              | zinc finger protein 37                                                                                                            | -2.05 | 0.0008 |
| <i>Crym</i>               | crystallin, mu                                                                                                                    | -2.05 | 0.0075 |
| <i>Napepld</i>            | N-acyl phosphatidylethanolamine phospholipase D                                                                                   | -2.05 | 0.0201 |
| <i>Sdr9c7</i>             | short chain dehydrogenase/reductase family 9C, member 7                                                                           | -2.06 | 0.0004 |
| <i>Asgr1</i>              | asialoglycoprotein receptor 1                                                                                                     | -2.07 | 0.0000 |
| <i>Ncam2</i>              | neural cell adhesion molecule 2                                                                                                   | -2.07 | 0.0005 |
| <i>Pvr13</i>              | poliovirus receptor-related 3                                                                                                     | -2.08 | 0.0000 |
| <i>Atxn7l1</i>            | ataxin 7-like 1                                                                                                                   | -2.09 | 0.0280 |
| <i>Cers6</i>              | ceramide synthase 6                                                                                                               | -2.10 | 0.0002 |
| <i>Afm</i>                | afamin                                                                                                                            | -2.10 | 0.0000 |
| <i>C1r</i>                | complement component 1, r subcomponent                                                                                            | -2.11 | 0.0002 |
| <i>Inmt</i>               | indolethylamine N-methyltransferase                                                                                               | -2.12 | 0.0151 |
| <i>RGD1566035</i>         | Protein tyrosine phosphatase type IVA 1                                                                                           | -2.12 | 0.0011 |
| <i>Ficd</i>               | FIC domain containing                                                                                                             | -2.13 | 0.0265 |
| <i>Serpina3c</i>          | serine (or cysteine) proteinase inhibitor, clade A, member 3C                                                                     | -2.13 | 0.0061 |
| <i>Papss2</i>             | 3-phosphoadenosine 5-phosphosulfate synthase 2                                                                                    | -2.14 | 0.0008 |
| <i>Nr3c1</i>              | nuclear receptor subfamily 3, group C, member 1                                                                                   | -2.15 | 0.0000 |
| <i>Irak3</i>              | interleukin-1 receptor-associated kinase 3                                                                                        | -2.19 | 0.0051 |
| <i>Rnf144b</i>            | ring finger protein 144B                                                                                                          | -2.20 | 0.0007 |
| <i>Sts</i>                | steroid sulfatase (microsomal), isozyme S                                                                                         | -2.20 | 0.0000 |
| <i>Esrrg</i>              | estrogen-related receptor gamma                                                                                                   | -2.20 | 0.0003 |
| <i>Casp6</i>              | caspase 6                                                                                                                         | -2.21 | 0.0011 |
| <i>RGD1564074</i>         | INTERACTS WITH lead diacetate AND aflatoxin B1 (ortholog) AND coumestrol (ortholog)                                               | -2.22 | 0.0312 |
| <i>Gpld1</i>              | glycosylphosphatidylinositol specific phospholipase D1                                                                            | -2.23 | 0.0003 |
| <i>Slc16a4</i>            | solute carrier family 16, member 4                                                                                                | -2.23 | 0.0284 |
| <i>Rad54l2</i>            | RAD54-like 2 (S. cerevisiae)                                                                                                      | -2.23 | 0.0176 |
| <i>Crem</i>               | cAMP responsive element modulator                                                                                                 | -2.25 | 0.0015 |
| <i>Mup5</i>               | major urinary protein 5                                                                                                           | -2.26 | 0.0196 |
| <i>RGD1309362</i>         | similar to interferon-inducible GTPase                                                                                            | -2.27 | 0.0116 |
| <i>Ugp2</i>               | UDP-glucose pyrophosphorylase 2                                                                                                   | -2.29 | 0.0403 |
| <i>Ptp4a1</i>             | protein tyrosine phosphatase type IVA, member 1                                                                                   | -2.29 | 0.0006 |
| <i>Pvr12</i>              | poliovirus receptor-related 2                                                                                                     | -2.29 | 0.0035 |
| <i>Amacr</i>              | alpha-methylacyl-CoA racemase                                                                                                     | -2.30 | 0.0005 |
| <i>Mapkapk2</i>           | mitogen-activated protein kinase-activated protein kinase 2                                                                       | -2.31 | 0.0013 |
| <i>Rad54l2</i>            | helicase ARIP4                                                                                                                    | -2.31 | 0.0007 |

|                     |                                                                                |       |        |
|---------------------|--------------------------------------------------------------------------------|-------|--------|
| <i>Slc38a2</i>      | solute carrier family 38, member 2                                             | -2.31 | 0.0004 |
| <i>LOC102549500</i> | uncharacterized LOC102549500                                                   | -2.32 | 0.0020 |
| <i>Nnmt</i>         | nicotinamide N-methyltransferase                                               | -2.33 | 0.0047 |
| <i>Pbld1</i>        | phenazine biosynthesis-like protein domain containing 1                        | -2.34 | 0.0033 |
| <i>Cyp2c12</i>      | cytochrome P450, family 2, subfamily c, polypeptide 12                         | -2.35 | 0.0221 |
| <i>Gys2</i>         | glycogen synthase 2                                                            | -2.35 | 0.0436 |
| <i>Tpst1</i>        | tyrosylprotein sulfotransferase 1                                              | -2.36 | 0.0005 |
| <i>Parp9</i>        | poly (ADP-ribose) polymerase family, member 9                                  | -2.37 | 0.0003 |
| <i>Csrp1</i>        | cysteine and glycine-rich protein 1                                            | -2.37 | 0.0009 |
| <i>Xbp1</i>         | X-box binding protein 1                                                        | -2.37 | 0.0000 |
| <i>Acsm3</i>        | acyl-CoA synthetase medium-chain family member 3                               | -2.38 | 0.0026 |
| <i>Pck1</i>         | phosphoenolpyruvate carboxykinase 1 (soluble)                                  | -2.39 | 0.0289 |
| <i>Rnf39</i>        | ring finger protein 39                                                         | -2.39 | 0.0010 |
| <i>Slc25a25</i>     | solute carrier family 25 (mitochondrial carrier, phosphate carrier), member 25 | -2.40 | 0.0140 |
| <i>Agmo</i>         | alkylglycerol monooxygenase                                                    | -2.41 | 0.0000 |
| <i>Oaf</i>          | out at first homolog                                                           | -2.42 | 0.0094 |
| <i>Pdia5</i>        | protein disulfide isomerase family A, member 5                                 | -2.42 | 0.0001 |
| <i>LOC100910057</i> | sulfotransferase 1C2-like [Source:RGD Symbol;Acc:6500449]                      | -2.44 | 0.0104 |
| <i>Ces1c</i>        | carboxylesterase 1C                                                            | -2.44 | 0.0003 |
| ---                 | Protein LOC100911928                                                           | -2.46 | 0.0001 |
| <i>Net1</i>         | neuroepithelial cell transforming 1                                            | -2.47 | 0.0044 |
| <i>Fmo3</i>         | flavin containing monooxygenase 3                                              | -2.48 | 0.0000 |
| <i>Rcan1</i>        | regulator of calcineurin 1                                                     | -2.51 | 0.0000 |
| <i>Foxa1</i>        | forkhead box A1                                                                | -2.52 | 0.0001 |
| <i>Hamp</i>         | hepcidin antimicrobial peptide                                                 | -2.52 | 0.0022 |
| <i>Prr16</i>        | proline rich 16                                                                | -2.54 | 0.0000 |
| <i>Aox1</i>         | aldehyde oxidase 1                                                             | -2.54 | 0.0004 |
| <i>C1s</i>          | complement component 1, s subcomponent                                         | -2.55 | 0.0062 |
| <i>Cml2</i>         | camello-like 2                                                                 | -2.56 | 0.0059 |
| <i>Cml2</i>         | camello-like 2 (Cml2), mRNA                                                    | -2.56 | 0.0059 |
| <i>Oas1a</i>        | 2-5 oligoadenylate synthetase 1A                                               | -2.58 | 0.0307 |
| <i>Olr1353</i>      | olfactory receptor 1353                                                        | -2.58 | 0.0079 |
| <i>Wsb1</i>         | WD repeat and SOCS box-containing 1                                            | -2.59 | 0.0058 |
| <i>Rtp3</i>         | receptor (chemosensory) transporter protein 3                                  | -2.61 | 0.0039 |
| <i>Slc17a2</i>      | solute carrier family 17, member 2                                             | -2.61 | 0.0000 |
| <i>LOC298111</i>    | alpha2u globulin                                                               | -2.62 | 0.0012 |
| <i>Tenm2</i>        | teneurin transmembrane protein 2                                               | -2.67 | 0.0002 |
| <i>Hhex</i>         | hematopoietically expressed homeobox                                           | -2.67 | 0.0069 |
| <i>RGD1307603</i>   | similar to hypothetical protein MGC37914                                       | -2.69 | 0.0325 |
| <i>Asl</i>          | argininosuccinate lyase                                                        | -2.71 | 0.0094 |
| <i>Adamts5</i>      | ADAM metallopeptidase with thrombospondin type 1 motif, 5                      | -2.74 | 0.0137 |
| <i>Dpp6</i>         | dipeptidylpeptidase 6                                                          | -2.74 | 0.0064 |
| <i>LOC100362572</i> | Mpv17 transgene, kidney disease mutant-like (predicted)-like                   | -2.75 | 0.0003 |
| <i>Chac1</i>        | ChaC glutathione-specific gamma-glutamylcyclotransferase 1                     | -2.78 | 0.0041 |
| <i>Cesl1</i>        | carboxylesterase-like 1                                                        | -2.79 | 0.0001 |
| <i>Slc46a1</i>      | solute carrier family 46 (folate transporter), member 1                        | -2.80 | 0.0001 |
| <i>Ror1</i>         | receptor tyrosine kinase-like orphan receptor 1                                | -2.81 | 0.0000 |
| <i>Tmem144</i>      | transmembrane protein 144                                                      | -2.87 | 0.0019 |
| <i>Abcc2</i>        | ATP-binding cassette, subfamily C (CFTR/MRP), member 2                         | -2.88 | 0.0002 |
| <i>Cyp3a9</i>       | cytochrome P450, family 3, subfamily a, polypeptide 9                          | -2.93 | 0.0025 |
| <i>Cpq</i>          | carboxypeptidase Q                                                             | -2.96 | 0.0000 |
| ---                 | Uncharacterized protein                                                        | -3.00 | 0.0020 |
| <i>Atp11c</i>       | ATPase, class VI, type 11C                                                     | -3.01 | 0.0001 |
| <i>RGD1562392</i>   | similar to Sulfotransferase K1 (rSULT1C2)                                      | -3.05 | 0.0033 |
| <i>Hal</i>          | histidine ammonia lyase                                                        | -3.05 | 0.0011 |
| <i>LOC100363405</i> | Zfp37 pseudogene                                                               | -3.07 | 0.0000 |
| <i>Irs2</i>         | insulin receptor substrate 2                                                   | -3.09 | 0.0032 |

|                     |                                                                                                                   |        |        |
|---------------------|-------------------------------------------------------------------------------------------------------------------|--------|--------|
| <i>Habp2</i>        | hyaluronan binding protein 2                                                                                      | -3.11  | 0.0000 |
| <i>Helz2</i>        | helicase with zinc finger 2, transcriptional coactivator                                                          | -3.11  | 0.0052 |
| <i>Pde4b</i>        | phosphodiesterase 4B, cAMP specific                                                                               | -3.13  | 0.0015 |
| <i>Dusp1</i>        | dual specificity phosphatase 1                                                                                    | -3.17  | 0.0027 |
| <i>Lgsn</i>         | lengsin, lens protein with glutamine synthetase domain                                                            | -3.25  | 0.0014 |
| <i>Ifitm3</i>       | interferon induced transmembrane protein 3                                                                        | -3.28  | 0.0003 |
| <i>Fam169b</i>      | family with sequence similarity 169, member B                                                                     | -3.29  | 0.0029 |
| <i>LOC685067</i>    | similar to guanylate binding protein family, member 6                                                             | -3.35  | 0.0005 |
| <i>Smagp</i>        | small cell adhesion glycoprotein                                                                                  | -3.41  | 0.0005 |
| <i>Egfr</i>         | epidermal growth factor receptor                                                                                  | -3.47  | 0.0001 |
| <i>Ccnd1</i>        | cyclin D1                                                                                                         | -3.48  | 0.0332 |
| <i>Eml5</i>         | echinoderm microtubule associated protein like 5                                                                  | -3.48  | 0.0000 |
| <i>Gimd1</i>        | GIMAP family P-loop NTPase domain containing 1                                                                    | -3.51  | 0.0119 |
| <i>Ces1d</i>        | carboxylesterase 1D                                                                                               | -3.52  | 0.0000 |
| <i>LOC366130</i>    | similar to Down syndrome critical region protein 3 homolog (Down syndrome critical region protein A homolog)      | -3.72  | 0.0000 |
| <i>LOC100910526</i> | ENCODES a protein that exhibits sulfotransferase activity (inferred) AND INVOLVED IN metabolic process (inferred) | -3.73  | 0.0005 |
| <i>Got1</i>         | glutamic-oxaloacetic transaminase 1, soluble                                                                      | -3.85  | 0.0045 |
| <i>Lin7a</i>        | lin-7 homolog a (C. elegans)                                                                                      | -4.01  | 0.0001 |
| <i>RGD1565421</i>   | similar to Sulfotransferase K2 (rSULT1C2A) [Source:RGD Symbol;Acc:1565421]                                        | -4.24  | 0.0024 |
| <i>RGD1565682</i>   | similar to lipase-like, ab-hydrolase domain containing 2                                                          | -4.43  | 0.0009 |
| ---                 | similar to Spleen protein 1 precursor (RSP-1) (LOC688335), mRNA                                                   | -4.62  | 0.0000 |
| <i>Rgn</i>          | regucalcin (senescence marker protein-30)                                                                         | -4.64  | 0.0009 |
| ---                 | similar to Spleen protein 1 precursor (RSP-1) (LOC688335), mRNA                                                   | -4.80  | 0.0001 |
| <i>LOC688335</i>    | similar to Spleen protein 1 precursor (RSP-1)                                                                     | -4.81  | 0.0000 |
| <i>Lin7a</i>        | ENCODES a protein that exhibits PDZ domain binding AND L27 domain binding (ortholog)                              | -4.85  | 0.0001 |
| <i>Cyp2c11</i>      | cytochrome P450, subfamily 2, polypeptide 11                                                                      | -4.86  | 0.0000 |
| <i>UST4r</i>        | integral membrane transport protein UST4r                                                                         | -4.94  | 0.0000 |
| <i>Cish</i>         | cytokine inducible SH2-containing protein                                                                         | -5.04  | 0.0054 |
| <i>Zdhhc23</i>      | zinc finger, DHHC-type containing 23                                                                              | -5.05  | 0.0003 |
| <i>A2ml1</i>        | alpha-2-macroglobulin-like 1                                                                                      | -5.07  | 0.0026 |
| <i>Marveld1</i>     | MARVEL domain containing 1                                                                                        | -5.10  | 0.0002 |
| <i>Sult1c2</i>      | sulfotransferase family 1C member 2                                                                               | -5.54  | 0.0007 |
| ---                 | Uncharacterized protein                                                                                           | -6.12  | 0.0023 |
| <i>Fmo1</i>         | flavin containing monooxygenase 1                                                                                 | -6.14  | 0.0036 |
| <i>Amdhd1</i>       | amidohydrolase domain containing 1                                                                                | -6.36  | 0.0003 |
| <i>Rdh16</i>        | retinol dehydrogenase 16 (all-trans)                                                                              | -6.38  | 0.0000 |
| <i>Fabp7</i>        | fatty acid binding protein 7, brain                                                                               | -6.44  | 0.0000 |
| <i>Gadd45g</i>      | growth arrest and DNA-damage-inducible, gamma                                                                     | -7.26  | 0.0171 |
| <i>LOC298111</i>    | alpha2u globulin [Source:RGD Symbol;Acc:1593272]                                                                  | -7.45  | 0.0010 |
| <i>Slc22a8</i>      | solute carrier family 22 (organic anion transporter), member 8                                                    | -7.81  | 0.0003 |
| <i>Onecut1</i>      | one cut homeobox 1                                                                                                | -7.88  | 0.0019 |
| <i>LOC100912610</i> | major urinary protein-like [Source:RGD Symbol;Acc:6486015]                                                        | -9.31  | 0.0005 |
| <i>Nox4</i>         | NADPH oxidase 4                                                                                                   | -10.82 | 0.0000 |
| <i>Hao2</i>         | hydroxyacid oxidase 2 (long chain)                                                                                | -11.05 | 0.0000 |
| <i>Gfra1</i>        | GDNF family receptor alpha 1                                                                                      | -11.29 | 0.0000 |
| <i>Car3</i>         | carbonic anhydrase 3                                                                                              | -13.50 | 0.0001 |
| <i>Dhrs7</i>        | dehydrogenase/reductase (SDR family) member 7                                                                     | -14.98 | 0.0000 |
| <i>LOC100910235</i> | sulfotransferase 1C1-like [Source:RGD Symbol;Acc:6499500]                                                         | -15.60 | 0.0001 |
| <i>Sult1c3</i>      | sulfotransferase family, cytosolic, 1C, member 3                                                                  | -16.33 | 0.0001 |
| <i>Socs2</i>        | suppressor of cytokine signaling 2                                                                                | -16.56 | 0.0001 |
| <i>Nrep</i>         | neuronal regeneration related protein                                                                             | -16.95 | 0.0000 |
| <i>Cyp3a18</i>      | cytochrome P450, family 3, subfamily a, polypeptide 18                                                            | -20.66 | 0.0000 |
| <i>Sds</i>          | serine dehydratase                                                                                                | -22.07 | 0.0108 |
| <i>LOC100360049</i> | rCG64165-like                                                                                                     | -46.12 | 0.0000 |

|                     |                                                |         |        |
|---------------------|------------------------------------------------|---------|--------|
| <i>LOC100360095</i> | urinary protein 1-like                         | -51.36  | 0.0000 |
| <i>LOC100912405</i> | urinary protein 3-like                         | -57.62  | 0.0000 |
| <i>Cdh17</i>        | cadherin 17                                    | -59.12  | 0.0000 |
| <i>Stac3</i>        | SH3 and cysteine rich domain 3                 | -173.24 | 0.0000 |
| <i>Acnat2</i>       | acyl-coenzyme A amino acid N-acyltransferase 2 | -190.34 | 0.0000 |

---

**Table S2      Fold change (FC) and *P*-value of all differentially expressed transcripts (FC > 1.3 or < -1.3, *P* < 0.05) between groups LE vs. LC**

| Gene Symbol          | Gene Description                                                                    | FC   | <i>P</i> -value |
|----------------------|-------------------------------------------------------------------------------------|------|-----------------|
| <i>Inmt</i>          | indolethylamine N-methyltransferase                                                 | 2.47 | 0.0482          |
| <i>Olr886</i>        | ENCODES a protein that exhibits G-protein coupled receptor activity (inferred)      | 1.87 | 0.0056          |
| <i>Tcp11x2</i>       | t-complex 11 family, X-linked 2                                                     | 1.79 | 0.0298          |
| <i>Tas2r116</i>      | taste receptor, type 2, member 116                                                  | 1.70 | 0.0022          |
| <i>Ccl21</i>         | chemokine (C-C motif) ligand 21                                                     | 1.69 | 0.0009          |
| <i>Id2</i>           | inhibitor of DNA binding 2                                                          | 1.67 | 0.0201          |
| <i>Zfp69</i>         | zinc finger protein 69 [Source:RGD Symbol;Acc:2322990]                              | 1.63 | 0.0384          |
| <i>Olr377</i>        | olfactory receptor 377                                                              | 1.62 | 0.0162          |
| <i>MGC114246</i>     | similar to cathepsin R                                                              | 1.62 | 0.0068          |
| <i>Lpcat2</i>        | lysophosphatidylcholine acyltransferase 2                                           | 1.60 | 0.0018          |
| <i>LOC689396</i>     | similar to RNA polymerase II elongation factor ELL2 [Source:RGD Symbol;Acc:1593468] | 1.60 | 0.0069          |
| <i>Olr1084</i>       | olfactory receptor 1084                                                             | 1.60 | 0.0164          |
| <i>RGD1308195</i>    | similar to secreted Ly6/uPAR related protein 2                                      | 1.59 | 0.0011          |
| <i>Zfp606</i>        | zinc finger protein 606                                                             | 1.58 | 0.0189          |
| <i>Vom2r6</i>        | vomeranase 2 receptor, 6                                                            | 1.58 | 0.0055          |
| <i>Akap4</i>         | A kinase (PRKA) anchor protein 4                                                    | 1.58 | 0.0130          |
| <i>Slc22a4</i>       | solute carrier family 22 (organic cation/zwitterion transporter), member 4          | 1.56 | 0.0276          |
| <i>Abca9</i>         | ATP-binding cassette, sub-family A (ABC1), member 9                                 | 1.56 | 0.0466          |
| <i>Jade2</i>         | jade family PHD finger 2                                                            | 1.55 | 0.0192          |
| <i>Ppfbp2</i>        | PTPRF interacting protein, binding protein 2 (liprin beta 2)                        | 1.55 | 0.0113          |
| <i>Vom2r49</i>       | vomeranase 2 receptor, 49                                                           | 1.55 | 0.0421          |
| <i>Grifin</i>        | galectin-related inter-fiber protein                                                | 1.55 | 0.0038          |
| <i>Lrrc39</i>        | leucine rich repeat containing 39                                                   | 1.54 | 0.0013          |
| <i>Olr1653</i>       | olfactory receptor 1653                                                             | 1.54 | 0.0321          |
| <i>1700016H13Rik</i> | RIKEN cDNA 1700016H13 gene                                                          | 1.53 | 0.0084          |
| <i>Olr821</i>        | olfactory receptor 821                                                              | 1.53 | 0.0037          |
| <i>Ccdc152</i>       | coiled-coil domain containing 152                                                   | 1.53 | 0.0100          |
| <i>Serpmb5</i>       | serpin peptidase inhibitor, clade B (ovalbumin), member 5                           | 1.53 | 0.0060          |
| <i>Bmp1</i>          | bone morphogenetic protein 1                                                        | 1.53 | 0.0010          |
| <i>LOC102549391</i>  | zinc finger protein 879-like                                                        | 1.52 | 0.0004          |
| <i>Cabp2</i>         | calcium binding protein 2                                                           | 1.51 | 0.0425          |
| <i>Olr824</i>        | olfactory receptor 824                                                              | 1.50 | 0.0417          |
| <i>Akap14</i>        | A kinase (PRKA) anchor protein 14                                                   | 1.50 | 0.0096          |
| <i>Zfp276</i>        | zinc finger protein (C2H2 type) 276                                                 | 1.49 | 0.0364          |
| <i>LOC102555587</i>  | uncharacterized LOC102555587                                                        | 1.49 | 0.0163          |
| <i>Olr468</i>        | olfactory receptor 468                                                              | 1.49 | 0.0037          |
| <i>Afap1</i>         | actin filament associated protein 1                                                 | 1.49 | 0.0121          |
| <i>Vom1r72</i>       | vomeranase 1 receptor 72                                                            | 1.48 | 0.0131          |
| <i>Pira2</i>         | Protein LOC100912456                                                                | 1.48 | 0.0242          |
| <i>Scn8a</i>         | sodium channel, voltage gated, type VIII, alpha subunit                             | 1.48 | 0.0235          |
| <i>Klra2</i>         | killer cell lectin-like receptor, subfamily A, member 2                             | 1.48 | 0.0144          |
| <i>Prph</i>          | peripherin                                                                          | 1.47 | 0.0042          |
| <i>Ift88</i>         | intraflagellar transport 88                                                         | 1.47 | 0.0368          |
| <i>Tex19.2</i>       | testis expressed gene 19.2                                                          | 1.47 | 0.0126          |
| <i>RGD1305298</i>    | uncharacterized protein LOC299330                                                   | 1.46 | 0.0143          |
| <i>Cdr2l</i>         | cerebellar degeneration-related protein 2-like                                      | 1.46 | 0.0337          |
| <i>Syn3</i>          | synapsin III                                                                        | 1.46 | 0.0076          |
| <i>Clcn6</i>         | chloride channel, voltage-sensitive 6                                               | 1.45 | 0.0221          |
| <i>Gucy1b2</i>       | guanylate cyclase 1, soluble, beta 2                                                | 1.45 | 0.0188          |
| <i>Olr453</i>        | olfactory receptor 453                                                              | 1.45 | 0.0058          |
| <i>Olr305</i>        | olfactory receptor 305                                                              | 1.44 | 0.0471          |

|                      |                                                                                                    |      |        |
|----------------------|----------------------------------------------------------------------------------------------------|------|--------|
| <i>LOC102555616</i>  | uncharacterized LOC102555616                                                                       | 1.44 | 0.0002 |
| <i>Mrpl13</i>        | mitochondrial ribosomal protein L13                                                                | 1.44 | 0.0321 |
| <i>Lrp2</i>          | low density lipoprotein receptor-related protein 2                                                 | 1.44 | 0.0275 |
| <i>Apln</i>          | apelin                                                                                             | 1.44 | 0.0441 |
| <i>Ddx60</i>         | DEAD (Asp-Glu-Ala-Asp) box polypeptide 60                                                          | 1.44 | 0.0472 |
| <i>Ces2e</i>         | carboxylesterase 2E                                                                                | 1.44 | 0.0321 |
| <i>Zfp14</i>         | ZFP14 zinc finger protein                                                                          | 1.44 | 0.0203 |
| <i>Plk1</i>          | polo-like kinase 1                                                                                 | 1.44 | 0.0078 |
| <i>Itgb3bp</i>       | Chalmel, et. al. AceView Annotation Itgb3bp.aSep08 Testis-expressed Unannotated Transcripts (TUTs) | 1.43 | 0.0095 |
| <i>RGD1564865</i>    | similar to 20-alpha-hydroxysteroid dehydrogenase                                                   | 1.43 | 0.0404 |
| <i>Ctxn2</i>         | cortixin 2                                                                                         | 1.43 | 0.0153 |
| <i>Tec</i>           | tec protein tyrosine kinase                                                                        | 1.43 | 0.0047 |
| <i>Spz1</i>          | spermatogenic leucine zipper 1                                                                     | 1.43 | 0.0021 |
| <i>Tcta</i>          | T-cell leukemia translocation altered                                                              | 1.43 | 0.0087 |
| <i>Mgam</i>          | PARTICIPATES IN galactose metabolic pathway AND starch and sucrose metabolic pathway               | 1.43 | 0.0304 |
| <i>Stard9</i>        | StAR-related lipid transfer domain containing 9                                                    | 1.43 | 0.0386 |
| <i>Pira2</i>         | Protein LOC100912456                                                                               | 1.42 | 0.0233 |
| <i>Apcdd1</i>        | adenomatosis polyposis coli down-regulated 1                                                       | 1.42 | 0.0260 |
| <i>Has2</i>          | hyaluronan synthase 2                                                                              | 1.42 | 0.0039 |
| <i>Coq5</i>          | coenzyme Q5, methyltransferase                                                                     | 1.41 | 0.0233 |
| <i>Bpgm</i>          | 2,3-bisphosphoglycerate mutase                                                                     | 1.41 | 0.0423 |
| <i>Gpr82</i>         | G protein-coupled receptor 82                                                                      | 1.41 | 0.0458 |
| <i>RGD1566120</i>    | similar to novel protein [Source:RGD Symbol;Acc:1566120]                                           | 1.41 | 0.0492 |
| <i>Pdp2</i>          | pyruvate dehydrogenase phosphatase catalytic subunit 2                                             | 1.41 | 0.0045 |
| <i>RGD1564599</i>    | RGD1564599 (RGD1564599), mRNA                                                                      | 1.41 | 0.0488 |
| <i>Hk2</i>           | hexokinase 2                                                                                       | 1.41 | 0.0290 |
| <i>Adat2</i>         | adenosine deaminase, tRNA-specific 2                                                               | 1.41 | 0.0040 |
| <i>LOC102551365</i>  | stress response protein nst-1-like                                                                 | 1.41 | 0.0380 |
| <i>Olr224</i>        | olfactory receptor 224                                                                             | 1.41 | 0.0305 |
| <i>LOC102553026</i>  | INTERACTS WITH 17beta-estradiol (ortholog)                                                         | 1.41 | 0.0417 |
| <i>NONMMUG026978</i> | Non-coding transcript identified by NONCODE: Sense No Exonic                                       | 1.40 | 0.0261 |
| <i>Bambi</i>         | BMP and activin membrane-bound inhibitor                                                           | 1.40 | 0.0253 |
| <i>Tceal7</i>        | transcription elongation factor A (SII)-like 7                                                     | 1.40 | 0.0421 |
| <i>Olr1174</i>       | olfactory receptor 1174                                                                            | 1.40 | 0.0124 |
| <i>RGD1563104</i>    | similar to Vigilin (High density lipoprotein-binding protein)                                      | 1.40 | 0.0354 |
| <i>RGD1565252</i>    | Protein RGD1565252                                                                                 | 1.40 | 0.0186 |
| <i>lhh</i>           | Indian hedgehog                                                                                    | 1.40 | 0.0229 |
| <i>LOC100910240</i>  | tyrosine-protein phosphatase non-receptor type 13-like                                             | 1.40 | 0.0426 |
| <i>Nabp1</i>         | nucleic acid binding protein 1                                                                     | 1.40 | 0.0231 |
| <i>Nuf2</i>          | NUF2, NDC80 kinetochore complex component                                                          | 1.40 | 0.0265 |
| <i>Tmem114</i>       | transmembrane protein 114                                                                          | 1.40 | 0.0014 |
| <i>Adam4</i>         | a disintegrin and metalloprotease domain 4                                                         | 1.39 | 0.0368 |
| <i>Eppk1</i>         | ENCODES a protein that exhibits poly(A) RNA binding (ortholog)                                     | 1.39 | 0.0150 |
| <i>Pacsin1</i>       | protein kinase C and casein kinase substrate in neurons 1                                          | 1.39 | 0.0109 |
| <i>Lck</i>           | LCK proto-oncogene, Src family tyrosine kinase                                                     | 1.38 | 0.0021 |
| <i>Serpinc13</i>     | serpin peptidase inhibitor, clade B (ovalbumin), member 13                                         | 1.38 | 0.0128 |
| <i>Panx1</i>         | Pannexin 1                                                                                         | 1.38 | 0.0437 |
| <i>Depdc1</i>        | DEP domain containing 1                                                                            | 1.38 | 0.0314 |
| <i>Rffl</i>          | ring finger and FYVE-like domain containing E3 ubiquitin protein ligase                            | 1.38 | 0.0371 |
| <i>Tmem164</i>       | transmembrane protein 164                                                                          | 1.38 | 0.0148 |
| <i>Olr922</i>        | olfactory receptor 922                                                                             | 1.38 | 0.0328 |
| <i>Aif1</i>          | allograft inflammatory factor 1                                                                    | 1.38 | 0.0224 |
| <i>Nutm1</i>         | NUT midline carcinoma, family member 1                                                             | 1.38 | 0.0321 |
| <i>Mrps28</i>        | mitochondrial ribosomal protein S28                                                                | 1.38 | 0.0140 |

|                   |                                                                                                          |      |        |
|-------------------|----------------------------------------------------------------------------------------------------------|------|--------|
| <i>Slc34a1</i>    | solute carrier family 34 (type II sodium/phosphate cotransporter), member 1                              | 1.38 | 0.0000 |
| <i>Vom2r21</i>    | INTERACTS WITH ammonium chloride                                                                         | 1.38 | 0.0022 |
| <i>Tmem125</i>    | transmembrane protein 125                                                                                | 1.38 | 0.0089 |
| <i>RGD1562885</i> | similar to RIKEN cDNA 2300002M23                                                                         | 1.37 | 0.0275 |
| <i>RGD1304770</i> | similar to Na <sup>+</sup> dependent glucose transporter 1                                               | 1.37 | 0.0276 |
| <i>Rps15a1</i>    | ribosomal protein S15A-like 1 [Source:RGD Symbol;Acc:1596017]                                            | 1.37 | 0.0005 |
| <i>Olr707</i>     | olfactory receptor 707                                                                                   | 1.37 | 0.0220 |
| <i>LOC691670</i>  | similar to natural killer cell protease 7                                                                | 1.37 | 0.0079 |
| <i>Nostrin</i>    | nitric oxide synthase trafficking                                                                        | 1.37 | 0.0010 |
| <i>Scn10a</i>     | sodium channel, voltage-gated, type X, alpha subunit                                                     | 1.37 | 0.0379 |
| <i>Zfp52</i>      | zinc finger protein 52                                                                                   | 1.36 | 0.0196 |
| <i>G0s2</i>       | G0/G1switch 2                                                                                            | 1.36 | 0.0398 |
| <i>Pag1</i>       | phosphoprotein membrane anchor with glycosphingolipid microdomains 1                                     | 1.36 | 0.0077 |
| <i>Sh3rf1</i>     | SH3 domain containing ring finger 1                                                                      | 1.36 | 0.0270 |
| <i>Serpina6</i>   | serpin peptidase inhibitor, clade A (alpha-1 antiproteinase, antitrypsin), member 6                      | 1.36 | 0.0289 |
| <i>Cnksr3</i>     | Cnksr family member 3                                                                                    | 1.36 | 0.0146 |
| <i>Ssc4d</i>      | scavenger receptor cysteine rich family, 4 domains                                                       | 1.36 | 0.0149 |
| <i>Tfpt</i>       | TCF3 (E2A) fusion partner                                                                                | 1.36 | 0.0204 |
| <i>Scp2d1</i>     | SCP2 sterol-binding domain containing 1                                                                  | 1.36 | 0.0236 |
| <i>Drc3</i>       | dynein regulatory complex subunit 3                                                                      | 1.36 | 0.0249 |
| <i>Ptpn12</i>     | protein tyrosine phosphatase, non-receptor type 12                                                       | 1.36 | 0.0360 |
| <i>Ugt2a1</i>     | UDP glucuronosyltransferase 2 family, polypeptide A1 [Source:RGD Symbol;Acc:69432]                       | 1.36 | 0.0294 |
| <i>Itih5</i>      | inter-alpha (globulin) inhibitor H5                                                                      | 1.36 | 0.0078 |
| <i>Slc25a29</i>   | solute carrier family 25 (mitochondrial carnitine/acylcarnitine carrier), member 29                      | 1.36 | 0.0140 |
| <i>Lrig2</i>      | leucine-rich repeats and immunoglobulin-like domains 2                                                   | 1.36 | 0.0456 |
| <i>RGD1564854</i> | similar to divalent cation tolerant protein CUTA                                                         | 1.35 | 0.0034 |
| <i>Rara</i>       | retinoic acid receptor, alpha                                                                            | 1.35 | 0.0473 |
| <i>Mylk</i>       | myosin light chain kinase (Mylk), mRNA. Chalmel, et. al. Testis-expressed Unannotated Transcripts (TUTs) | 1.35 | 0.0413 |
| <i>Pcnxl4</i>     | pecanex-like 4 (Drosophila) [Source:RGD Symbol;Acc:1582892]                                              | 1.35 | 0.0119 |
| <i>Fuk</i>        | fucokinase                                                                                               | 1.35 | 0.0051 |
| <i>Cd300lf</i>    | Cd300 molecule-like family member F                                                                      | 1.35 | 0.0103 |
| <i>Mllt1</i>      | myeloid/lymphoid or mixed-lineage leukemia; translocated to, 1                                           | 1.35 | 0.0174 |
| <i>Oxgr1</i>      | oxoglutarate (alpha-ketoglutarate) receptor 1                                                            | 1.35 | 0.0315 |
| <i>Nab2</i>       | Ngfi-A binding protein 2                                                                                 | 1.35 | 0.0056 |
| <i>Ankrd66</i>    | ankyrin repeat domain 66 [Source:RGD Symbol;Acc:1560151]                                                 | 1.35 | 0.0128 |
| <i>Ogdhl</i>      | oxoglutarate dehydrogenase-like                                                                          | 1.35 | 0.0067 |
| <i>Cd69</i>       | Cd69 molecule                                                                                            | 1.35 | 0.0105 |
| <i>Fyb</i>        | FYN binding protein                                                                                      | 1.35 | 0.0092 |
| <i>Rnf11</i>      | ENCODS a protein that exhibits ubiquitin-protein transferase activity (ortholog)                         | 1.35 | 0.0138 |
| <i>Rnf11l2</i>    | INTERACTS WITH 2-methoxyethanol                                                                          | 1.35 | 0.0138 |
| <i>Slc6a12</i>    | solute carrier family 6 (neurotransmitter transporter), member 12                                        | 1.35 | 0.0210 |
| <i>Hist1h2ah</i>  | histone cluster 1, H2ah [Source:RGD Symbol;Acc:1594367]                                                  | 1.34 | 0.0219 |
| <i>Hspa1a</i>     | heat shock 70kD protein 1A                                                                               | 1.34 | 0.0111 |
| <i>Sh3kbp1</i>    | SH3-domain kinase binding protein 1                                                                      | 1.34 | 0.0020 |
| <i>Bpifa1</i>     | BPI fold containing family A, member 1                                                                   | 1.34 | 0.0135 |
| <i>RGD1305422</i> | similar to mKIAA0226 protein                                                                             | 1.34 | 0.0286 |
| <i>RGD1566355</i> | similar to cell division cycle 2-like 1                                                                  | 1.34 | 0.0463 |
| <i>Soga1</i>      | Protein Soga1                                                                                            | 1.34 | 0.0119 |
| <i>Taf1b</i>      | TATA box binding protein (Tbp)-associated factor, RNA polymerase I, B                                    | 1.34 | 0.0048 |
| <i>Chchd6</i>     | coiled-coil-helix-coiled-coil-helix domain containing 6                                                  | 1.34 | 0.0388 |



|                     |                                                                                                 |      |        |
|---------------------|-------------------------------------------------------------------------------------------------|------|--------|
| <i>Fhit</i>         | Chalmel, et. al. AceView Annotation Fhit.bSep08 Testis-expressed Unannotated Transcripts (TUTs) | 1.34 | 0.0297 |
| <i>Kctd2</i>        | potassium channel tetramerization domain containing 2 [Source:RGD Symbol;Acc:1566063]           | 1.34 | 0.0430 |
| <i>Syndig1</i>      | synapse differentiation inducing 1                                                              | 1.33 | 0.0170 |
| <i>Mtif2</i>        | mitochondrial translational initiation factor 2                                                 | 1.33 | 0.0335 |
| <i>Kif2a</i>        | kinesin heavy chain member 2A                                                                   | 1.33 | 0.0358 |
| <i>Tyrobp</i>       | Tyro protein tyrosine kinase binding protein                                                    | 1.33 | 0.0443 |
| <i>Rbm8a</i>        | RNA binding motif protein 8A                                                                    | 1.33 | 0.0173 |
| <i>Best4</i>        | bestrophin 4                                                                                    | 1.33 | 0.0220 |
| <i>Uroc1</i>        | urocanate hydratase 1                                                                           | 1.33 | 0.0139 |
| <i>Dner</i>         | delta/notch-like EGF repeat containing                                                          | 1.33 | 0.0296 |
| <i>Cers5</i>        | ceramide synthase 5                                                                             | 1.33 | 0.0378 |
| <i>LOC102555347</i> | uncharacterized LOC102555347                                                                    | 1.33 | 0.0079 |
| <i>Pcdhgc5</i>      | protocadherin gamma subfamily C, 5                                                              | 1.33 | 0.0291 |
| <i>Hmha1</i>        | histocompatibility (minor) HA-1                                                                 | 1.33 | 0.0358 |
| <i>S100a4</i>       | S100 calcium-binding protein A4                                                                 | 1.33 | 0.0168 |
| <i>Tap2</i>         | transporter 2, ATP-binding cassette, sub-family B (MDR/TAP)                                     | 1.33 | 0.0190 |
| <i>Dll1</i>         | delta-like 1 (Drosophila)                                                                       | 1.33 | 0.0447 |
| <i>Syngap1</i>      | synaptic Ras GTPase activating protein 1                                                        | 1.33 | 0.0248 |
| <i>Card11</i>       | caspase recruitment domain family, member 11                                                    | 1.32 | 0.0131 |
| <i>Cbx2</i>         | chromobox homolog 2                                                                             | 1.32 | 0.0015 |
| <i>LOC100909631</i> | ENCODES a protein that exhibits structural molecule activity (inferred)                         | 1.32 | 0.0096 |
| <i>Olr1562</i>      | ENCODES a protein that exhibits G-protein coupled receptor activity (inferred)                  | 1.32 | 0.0273 |
| <i>Klhl8</i>        | kelch-like family member 8                                                                      | 1.32 | 0.0148 |
| <i>Kif4a</i>        | kinesin family member 4A                                                                        | 1.32 | 0.0276 |
| <i>Npap60</i>       | nuclear pore associated protein [Source:RGD Symbol;Acc:3191]                                    | 1.32 | 0.0496 |
| <i>Tmem25</i>       | transmembrane protein 25                                                                        | 1.32 | 0.0153 |
| <i>Sirpb2l1</i>     | INTERACTS WITH 17beta-estradiol (ortholog)                                                      | 1.32 | 0.0314 |
| <i>Tmem253</i>      | transmembrane protein 253                                                                       | 1.32 | 0.0235 |
| <i>Grpr</i>         | gastrin releasing peptide receptor                                                              | 1.32 | 0.0040 |
| <i>LOC100360700</i> | hypothetical LOC100360700                                                                       | 1.32 | 0.0472 |
| <i>Cacna1b</i>      | calcium channel, voltage-dependent, N type, alpha 1B subunit                                    | 1.32 | 0.0141 |
| <i>RGD1560927</i>   | RGD1560927                                                                                      | 1.32 | 0.0092 |
| <i>RGD1564657</i>   | similar to cathepsin 1 precursor                                                                | 1.32 | 0.0472 |
| <i>Wnt2b</i>        | wingless-type MMTV integration site family, member 2B                                           | 1.32 | 0.0345 |
| <i>Dapp1</i>        | dual adaptor of phosphotyrosine and 3-phosphoinositides                                         | 1.32 | 0.0465 |
| <i>Cdc66</i>        | coiled-coil domain containing 66                                                                | 1.32 | 0.0226 |
| <i>Slc12a6</i>      | solute carrier family 12, member 6                                                              | 1.32 | 0.0258 |
| <i>Rbm41</i>        | RNA binding motif protein 41                                                                    | 1.32 | 0.0314 |
| <i>Cabp1</i>        | calcium binding protein 1                                                                       | 1.32 | 0.0256 |
| <i>Morc1</i>        | MORC family CW-type zinc finger 1                                                               | 1.32 | 0.0193 |
| <i>Tmem35</i>       | transmembrane protein 35                                                                        | 1.32 | 0.0218 |
| <i>Kcnn3</i>        | potassium channel, calcium activated intermediate/small conductance subfamily N alpha, member 3 | 1.32 | 0.0151 |
| <i>Atp8b5p</i>      | ATPase, class I, type 8B, member 5, pseudogene                                                  | 1.32 | 0.0236 |
| <i>Fcgr2a</i>       | Fc fragment of IgG, low affinity IIa, receptor                                                  | 1.31 | 0.0484 |
| <i>Nr1h5</i>        | nuclear receptor subfamily 1, group H, member 5                                                 | 1.31 | 0.0305 |
| <i>Gpcpd1</i>       | glycerophosphocholine phosphodiesterase 1                                                       | 1.31 | 0.0236 |
| <i>Atp1a2</i>       | ATPase, Na+/K+ transporting, alpha 2 polypeptide                                                | 1.31 | 0.0009 |
| <i>Krt8</i>         | keratin 8, type II                                                                              | 1.31 | 0.0184 |
| <i>Trex2</i>        | three prime repair exonuclease 2                                                                | 1.31 | 0.0283 |
| <i>Tbca</i>         | tubulin folding cofactor A [Source:RGD Symbol;Acc:1311538]                                      | 1.31 | 0.0488 |
| <i>Prima1</i>       | proline rich membrane anchor 1                                                                  | 1.31 | 0.0088 |
| <i>Anp32a</i>       | acidic (leucine-rich) nuclear phosphoprotein 32 family, member A                                | 1.31 | 0.0266 |
| <i>Dlx4</i>         | distal-less homeobox 4                                                                          | 1.31 | 0.0366 |

|                     |                                                                                                                                   |       |        |
|---------------------|-----------------------------------------------------------------------------------------------------------------------------------|-------|--------|
| <i>RGD1562844</i>   | INTERACTS WITH cisplatin                                                                                                          | -1.31 | 0.0302 |
| <i>Zswim8</i>       | zinc finger, SWIM-type containing 8                                                                                               | -1.31 | 0.0242 |
| ---                 | Uncharacterized protein                                                                                                           | -1.31 | 0.0100 |
| <i>Pik3ip1</i>      | phosphoinositide-3-kinase interacting protein 1                                                                                   | -1.31 | 0.0344 |
| <i>Zfp84</i>        | zinc finger protein 84                                                                                                            | -1.31 | 0.0202 |
| <i>Poglut1</i>      | protein O-glucosyltransferase 1                                                                                                   | -1.31 | 0.0421 |
| <i>LOC102546793</i> | uncharacterized LOC102546793                                                                                                      | -1.31 | 0.0314 |
| <i>Foxr1</i>        | forkhead box R1 [Source:RGD Symbol;Acc:1309739]                                                                                   | -1.31 | 0.0357 |
| <i>Zbtb48</i>       | zinc finger and BTB domain containing 48                                                                                          | -1.31 | 0.0149 |
| <i>Mcoln2</i>       | mucolipin 2                                                                                                                       | -1.31 | 0.0381 |
| <i>Rab3b</i>        | RAB3B, member RAS oncogene family                                                                                                 | -1.32 | 0.0384 |
| <i>Zfp773</i>       | zinc finger protein 773 [Source:MGI Symbol;Acc:MGI:1923623]                                                                       | -1.32 | 0.0038 |
| <i>Clec2l</i>       | C-type lectin domain family 2, member L                                                                                           | -1.32 | 0.0061 |
| <i>Hoxc4</i>        | homeo box C4                                                                                                                      | -1.32 | 0.0216 |
| <i>Olr1768</i>      | olfactory receptor 1768                                                                                                           | -1.32 | 0.0482 |
| <i>Bcl11b</i>       | B-cell CLL/lymphoma 11B (zinc finger protein) (Bcl11b), mRNA.<br>Chalmel, et. al. Testis-expressed Unannotated Transcripts (TUTs) | -1.32 | 0.0319 |
| <i>Ttc8</i>         | tetratricopeptide repeat domain 8                                                                                                 | -1.32 | 0.0487 |
| <i>Tut1</i>         | terminal uridylyl transferase 1, U6 snRNA-specific                                                                                | -1.32 | 0.0426 |
| <i>LOC690035</i>    | similar to Protein KIAA0586                                                                                                       | -1.32 | 0.0062 |
| <i>Cel</i>          | carboxyl ester lipase                                                                                                             | -1.32 | 0.0324 |
| <i>Olr1451</i>      | ENCODES a protein that exhibits olfactory receptor activity<br>(inferred)                                                         | -1.32 | 0.0106 |
| <i>LOC103691893</i> | putative ERV-F(c)1 provirus ancestral Env polyprotein                                                                             | -1.32 | 0.0425 |
| <i>Gpatch8</i>      | G patch domain containing 8                                                                                                       | -1.32 | 0.0452 |
| <i>Cxcr3</i>        | chemokine (C-X-C motif) receptor 3                                                                                                | -1.32 | 0.0426 |
| <i>Wdsub1</i>       | WD repeat, sterile alpha motif and U-box domain containing 1                                                                      | -1.32 | 0.0160 |
| <i>Cdkl4</i>        | cyclin-dependent kinase-like 4 [Source:RGD Symbol;Acc:1583704]                                                                    | -1.32 | 0.0227 |
| <i>Popdc3</i>       | popeye domain containing 3                                                                                                        | -1.32 | 0.0431 |
| <i>Smn1</i>         | survival of motor neuron 1, telomeric                                                                                             | -1.32 | 0.0126 |
| <i>Tgfb3</i>        | transforming growth factor, beta receptor III                                                                                     | -1.32 | 0.0396 |
| <i>Slc24a1</i>      | solute carrier family 24 (sodium/potassium/calcium exchanger),<br>member 1                                                        | -1.33 | 0.0402 |
| <i>Blk</i>          | BLK proto-oncogene, Src family tyrosine kinase                                                                                    | -1.33 | 0.0448 |
| <i>Ston1</i>        | stonin 1                                                                                                                          | -1.33 | 0.0085 |
| <i>Ndufa4l2</i>     | NADH dehydrogenase (ubiquinone) 1 alpha subcomplex, 4-like 2                                                                      | -1.33 | 0.0086 |
| <i>Slc50a1</i>      | solute carrier family 50 (sugar efflux transporter), member 1                                                                     | -1.33 | 0.0227 |
| <i>Tspan33</i>      | tetraspanin 33                                                                                                                    | -1.33 | 0.0351 |
| <i>Lrrc14</i>       | leucine rich repeat containing 14                                                                                                 | -1.33 | 0.0061 |
| <i>Cdx4</i>         | caudal type homeo box 4                                                                                                           | -1.33 | 0.0012 |
| <i>Sapcd1</i>       | suppressor APC domain containing 1                                                                                                | -1.33 | 0.0457 |
| <i>S100a11</i>      | S100 calcium binding protein A11                                                                                                  | -1.33 | 0.0425 |
| <i>LOC685152</i>    | ATPase, class I, type 8B, member 2                                                                                                | -1.33 | 0.0042 |
| <i>Pold2</i>        | polymerase (DNA directed), delta 2, accessory subunit                                                                             | -1.33 | 0.0316 |
| <i>Tmem39a</i>      | transmembrane protein 39a                                                                                                         | -1.33 | 0.0336 |
| <i>Upk1b</i>        | uroplakin 1B                                                                                                                      | -1.33 | 0.0361 |
| <i>Ankmy1</i>       | ankyrin repeat and MYND domain containing 1                                                                                       | -1.33 | 0.0372 |
| <i>Cml1</i>         | camello-like 1 (Cml1), mRNA                                                                                                       | -1.34 | 0.0186 |
| <i>Dnah2</i>        | Protein Dnah2                                                                                                                     | -1.34 | 0.0324 |
| <i>RGD1564651</i>   | similar to oocyte specific homeobox 3 [Source:RGD<br>Symbol;Acc:1564651]                                                          | -1.34 | 0.0297 |
| <i>Miip</i>         | migration and invasion inhibitory protein                                                                                         | -1.34 | 0.0421 |
| <i>Tfb2m</i>        | ENCODES a protein that exhibits poly(A) RNA binding (ortholog)                                                                    | -1.34 | 0.0214 |
| <i>Tas2r134</i>     | taste receptor, type 2, member 134                                                                                                | -1.34 | 0.0123 |
| <i>Sfmbt1</i>       | Scm-like with four mbt domains 1                                                                                                  | -1.34 | 0.0379 |
| <i>RGD1559482</i>   | similar to immunoglobulin superfamily, member 7                                                                                   | -1.34 | 0.0143 |
| <i>Olr312</i>       | olfactory receptor 312                                                                                                            | -1.34 | 0.0357 |
| <i>Rbbp9</i>        | retinoblastoma binding protein 9                                                                                                  | -1.34 | 0.0440 |

|                     |                                                                              |       |        |
|---------------------|------------------------------------------------------------------------------|-------|--------|
| <i>Wasf2</i>        | WAS protein family, member 2                                                 | -1.34 | 0.0298 |
| ---                 | ---                                                                          | -1.34 | 0.0092 |
| <i>Prmt3</i>        | proline-rich transmembrane protein 3                                         | -1.34 | 0.0180 |
| <i>Sh3d21</i>       | SH3 domain containing 21                                                     | -1.34 | 0.0413 |
| <i>Tubb4a</i>       | tubulin, beta 4A class IVa                                                   | -1.34 | 0.0276 |
| <i>Vwf</i>          | von Willebrand factor                                                        | -1.34 | 0.0365 |
| <i>Ly6h</i>         | lymphocyte antigen 6 complex, locus H                                        | -1.35 | 0.0133 |
| <i>Akap3</i>        | A kinase (PRKA) anchor protein 3                                             | -1.35 | 0.0072 |
| <i>LOC498084</i>    | Ab2-093                                                                      | -1.35 | 0.0106 |
| <i>Plekhh2</i>      | pleckstrin homology domain containing, family H (with MyTH4 domain) member 2 | -1.35 | 0.0044 |
| <i>Rnase10</i>      | ribonuclease, RNase A family, 10 (non-active)                                | -1.35 | 0.0427 |
| <i>Olr129</i>       | olfactory receptor 129                                                       | -1.35 | 0.0381 |
| <i>Cnga2</i>        | cyclic nucleotide gated channel alpha 2                                      | -1.35 | 0.0250 |
| <i>Tspan1</i>       | tetraspanin 1                                                                | -1.35 | 0.0097 |
| <i>Ighmbp2</i>      | immunoglobulin mu binding protein 2                                          | -1.35 | 0.0181 |
| <i>Ccdc185</i>      | coiled-coil domain containing 185                                            | -1.35 | 0.0102 |
| <i>Galns</i>        | galactosamine (N-acetyl)-6-sulfatase                                         | -1.35 | 0.0401 |
| <i>Bcl2</i>         | B-cell CLL/lymphoma 2                                                        | -1.35 | 0.0010 |
| <i>Entpd1</i>       | ENCODES a protein that exhibits nucleoside-diphosphatase activity (ortholog) | -1.35 | 0.0079 |
| <i>Snai1</i>        | snail family zinc finger 1                                                   | -1.35 | 0.0484 |
| <i>Gpr65</i>        | G-protein coupled receptor 65                                                | -1.36 | 0.0236 |
| <i>Tox</i>          | thymocyte selection-associated high mobility group box                       | -1.36 | 0.0246 |
| <i>LOC102555390</i> | uncharacterized LOC102555390                                                 | -1.36 | 0.0256 |
| <i>Banp</i>         | Btg3 associated nuclear protein                                              | -1.36 | 0.0268 |
| <i>Mboat7</i>       | membrane bound O-acyltransferase domain containing 7 (Mboat7), mRNA          | -1.36 | 0.0480 |
| <i>Mtx3</i>         | metaxin 3                                                                    | -1.36 | 0.0336 |
| <i>Tktl2</i>        | transketolase-like 2                                                         | -1.36 | 0.0251 |
| <i>Zfp367</i>       | zinc finger protein 367                                                      | -1.36 | 0.0140 |
| <i>RGD1308878</i>   | similar to arylacetamide deacetylase                                         | -1.36 | 0.0076 |
| <i>Cysltr1</i>      | cysteinyl leukotriene receptor 1                                             | -1.36 | 0.0103 |
| <i>Fuz</i>          | fuzzy planar cell polarity protein                                           | -1.36 | 0.0048 |
| <i>Mecom</i>        | MDS1 and EVI1 complex locus                                                  | -1.36 | 0.0245 |
| <i>Il2ra</i>        | interleukin 2 receptor, alpha                                                | -1.37 | 0.0443 |
| <i>Jag2</i>         | jagged 2 [Source:RGD Symbol;Acc:2938]                                        | -1.37 | 0.0160 |
| <i>Tbata</i>        | thymus, brain and testes associated                                          | -1.37 | 0.0238 |
| <i>Ehd3</i>         | EH-domain containing 3                                                       | -1.37 | 0.0269 |
| <i>Gpr55</i>        | G protein-coupled receptor 55                                                | -1.37 | 0.0198 |
| <i>LOC100362774</i> | rCG64303-like [Source:RGD Symbol;Acc:2324084]                                | -1.37 | 0.0173 |
| <i>Pkmyt1</i>       | protein kinase, membrane associated tyrosine/threonine 1                     | -1.37 | 0.0297 |
| <i>Iqcf1</i>        | IQ motif containing F1                                                       | -1.37 | 0.0038 |
| <i>Ankrd63</i>      | ankyrin repeat domain 63                                                     | -1.37 | 0.0151 |
| <i>Rabif</i>        | RAB interacting factor [Source:RGD Symbol;Acc:1359331]                       | -1.37 | 0.0234 |
| <i>RGD1564941</i>   | similar to ankyrin repeat domain 26                                          | -1.37 | 0.0353 |
| <i>Bgn</i>          | biglycan                                                                     | -1.38 | 0.0343 |
| <i>Olr1314</i>      | olfactory receptor 1314                                                      | -1.38 | 0.0471 |
| <i>Olr1314</i>      | olfactory receptor 1314 (Olr1314), mRNA                                      | -1.38 | 0.0471 |
| <i>Olr358</i>       | olfactory receptor 358                                                       | -1.38 | 0.0210 |
| <i>Dpysl2</i>       | dihydropyrimidinase-like 2                                                   | -1.38 | 0.0062 |
| <i>Olr1399</i>      | olfactory receptor 1399                                                      | -1.38 | 0.0452 |
| <i>LOC691254</i>    | hypothetical protein LOC691254                                               | -1.38 | 0.0162 |
| <i>LOC100361265</i> | rCG64283-like                                                                | -1.38 | 0.0367 |
| <i>Vom2r24</i>      | vomer nasal 2 receptor, 24                                                   | -1.38 | 0.0175 |
| <i>Entpd1</i>       | ectonucleoside triphosphate diphosphohydrolase 1                             | -1.38 | 0.0039 |
| <i>Fsd2</i>         | fibronectin type III and SPRY domain containing 2                            | -1.38 | 0.0143 |
| <i>LOC102553221</i> | MLV-related proviral Env polyprotein-like                                    | -1.38 | 0.0200 |

|                      |                                                                                                                      |       |        |
|----------------------|----------------------------------------------------------------------------------------------------------------------|-------|--------|
| <i>Olr1247</i>       | ENCODES a protein that exhibits olfactory receptor activity (inferred)                                               | -1.39 | 0.0033 |
| <i>Olr1247</i>       | olfactory receptor 1247                                                                                              | -1.39 | 0.0033 |
| <i>Rgr</i>           | retinal G protein coupled receptor                                                                                   | -1.39 | 0.0017 |
| <i>Mmp3</i>          | matrix metalloproteinase 3                                                                                           | -1.39 | 0.0400 |
| <i>Strn3</i>         | Striatin-3 [Source:UniProtKB/Swiss-Prot;Acc:P58405] Chalmel, et. al. Testis-expressed Unannotated Transcripts (TUTs) | -1.39 | 0.0455 |
| <i>Dock7</i>         | dedicator of cytokinesis 7                                                                                           | -1.39 | 0.0174 |
| <i>Nkain2</i>        | Na+/K+ transporting ATPase interacting 2 [Source:RGD Symbol;Acc:2323702]                                             | -1.39 | 0.0229 |
| <i>LOC100361579</i>  | prolactin family 5 subfamily a member 2-like                                                                         | -1.39 | 0.0268 |
| <i>Phf19</i>         | PHD finger protein 19                                                                                                | -1.40 | 0.0276 |
| <i>Myo5a</i>         | myosin VA                                                                                                            | -1.40 | 0.0132 |
| <i>Vom2r63</i>       | vomerolateral 2 receptor, 63                                                                                         | -1.40 | 0.0316 |
| <i>Rad54l</i>        | RAD54 like (S. cerevisiae)                                                                                           | -1.40 | 0.0134 |
| <i>Stk11ip</i>       | serine/threonine kinase 11 interacting protein                                                                       | -1.40 | 0.0328 |
| <i>Fzd3</i>          | frizzled class receptor 3                                                                                            | -1.40 | 0.0258 |
| <i>Ankrd33b</i>      | ankyrin repeat domain 33B                                                                                            | -1.40 | 0.0094 |
| <i>Hsf1</i>          | heat shock transcription factor 1                                                                                    | -1.41 | 0.0079 |
| <i>Maged2</i>        | melanoma antigen, family D, 2                                                                                        | -1.41 | 0.0023 |
| <i>Ric3</i>          | RIC3 acetylcholine receptor chaperone                                                                                | -1.41 | 0.0424 |
| <i>Olr330</i>        | olfactory receptor 330                                                                                               | -1.41 | 0.0236 |
| <i>Tle6</i>          | transducin-like enhancer of split 6 [Source:RGD Symbol;Acc:1561530]                                                  | -1.41 | 0.0015 |
| <i>Vom1r100</i>      | vomerolateral 1 receptor 100                                                                                         | -1.41 | 0.0193 |
| <i>Rabif</i>         | RAB interacting factor                                                                                               | -1.41 | 0.0261 |
| <i>U2af1l4</i>       | U2 small nuclear RNA auxiliary factor 1-like 4                                                                       | -1.42 | 0.0062 |
| <i>Barx1</i>         | BARX homeobox 1                                                                                                      | -1.42 | 0.0274 |
| <i>Ctnnal1</i>       | catenin (cadherin associated protein), alpha-like 1                                                                  | -1.42 | 0.0213 |
| <i>Olr639</i>        | olfactory receptor 639                                                                                               | -1.42 | 0.0254 |
| <i>Olr639</i>        | olfactory receptor 639 (Olr639), mRNA                                                                                | -1.42 | 0.0254 |
| <i>Olr639</i>        | olfactory receptor 639 (Olr639), mRNA                                                                                | -1.42 | 0.0254 |
| <i>Tmtc2</i>         | transmembrane and tetratricopeptide repeat containing 2                                                              | -1.42 | 0.0334 |
| <i>Arsb</i>          | arylsulfatase B                                                                                                      | -1.42 | 0.0111 |
| <i>LOC100361702</i>  | keratin associated protein 12-1-like                                                                                 | -1.42 | 0.0459 |
| <i>Nrxn3</i>         | neurexin 3                                                                                                           | -1.42 | 0.0000 |
| <i>Olr606</i>        | olfactory receptor 606                                                                                               | -1.43 | 0.0298 |
| <i>RGD1311343</i>    | similar to RIKEN cDNA 4930524B15                                                                                     | -1.43 | 0.0036 |
| <i>Zfp329</i>        | zinc finger protein 329                                                                                              | -1.43 | 0.0224 |
| <i>Olr657</i>        | olfactory receptor 657                                                                                               | -1.43 | 0.0445 |
| <i>Smim15</i>        | small integral membrane protein 15                                                                                   | -1.43 | 0.0028 |
| <i>LOC102547422</i>  | zinc finger protein 420-like                                                                                         | -1.43 | 0.0206 |
| <i>Rsl24d1</i>       | ribosomal L24 domain containing 1                                                                                    | -1.43 | 0.0058 |
| <i>Tmeff2</i>        | transmembrane protein with EGF-like and two follistatin-like domains 2                                               | -1.43 | 0.0165 |
| <i>Lipe</i>          | lipase, hormone sensitive                                                                                            | -1.43 | 0.0054 |
| <i>Olfml2a</i>       | olfactomedin-like 2A                                                                                                 | -1.43 | 0.0103 |
| ---                  | ---                                                                                                                  | -1.43 | 0.0408 |
| <i>Grm3</i>          | glutamate receptor, metabotropic 3                                                                                   | -1.43 | 0.0132 |
| ---                  | ---                                                                                                                  | -1.44 | 0.0078 |
| <i>LOC100360157</i>  | 1110034B05Rik protein-like                                                                                           | -1.44 | 0.0124 |
| <i>Dynlt1</i>        | dynein light chain Tctex-type 1                                                                                      | -1.44 | 0.0052 |
| <i>Ns5atp9</i>       | NS5A (hepatitis C virus) transactivated protein 9                                                                    | -1.45 | 0.0233 |
| <i>Wdr44</i>         | WD repeat domain 44                                                                                                  | -1.45 | 0.0314 |
| <i>Nlrp12</i>        | NLR family, pyrin domain containing 12                                                                               | -1.45 | 0.0238 |
| <i>Lifr</i>          | leukemia inhibitory factor receptor alpha                                                                            | -1.45 | 0.0051 |
| <i>NONMMUG023495</i> | Non-coding transcript identified by NONCODE: Sense No Exonic                                                         | -1.45 | 0.0321 |
| <i>Antxr1</i>        | anthrax toxin receptor 1                                                                                             | -1.45 | 0.0088 |

|                               |                                                                                                                                   |       |        |
|-------------------------------|-----------------------------------------------------------------------------------------------------------------------------------|-------|--------|
| <i>Ntn1</i>                   | netrin G1                                                                                                                         | -1.45 | 0.0333 |
| <i>Orai2</i>                  | ORAI calcium release-activated calcium modulator 2                                                                                | -1.45 | 0.0361 |
| <i>LOC102553180</i>           | protocadherin alpha-1-like                                                                                                        | -1.46 | 0.0330 |
| <i>Krtap31-1</i>              | keratin associated protein 31-1                                                                                                   | -1.46 | 0.0216 |
| <i>Cdcp2</i>                  | CUB domain containing protein 2 [Source:RGD Symbol;Acc:1563467]                                                                   | -1.46 | 0.0222 |
| <i>Olr510</i>                 | olfactory receptor 510                                                                                                            | -1.46 | 0.0055 |
| <i>ENSMUSG0000002854</i><br>2 | solute carrier family 6 (neurotransmitter transporter, glycine), member 9, Non-coding transcript identified by NONCODE: Antisense | -1.46 | 0.0118 |
| <i>Cd96</i>                   | CD96 molecule                                                                                                                     | -1.46 | 0.0045 |
| <i>Fv1</i>                    | Friend virus susceptibility 1                                                                                                     | -1.46 | 0.0004 |
| <i>LOC100362122</i>           | selection and upkeep of intraepithelial T cells 3-like                                                                            | -1.47 | 0.0191 |
| <i>Fam46a</i>                 | family with sequence similarity 46, member A                                                                                      | -1.47 | 0.0147 |
| <i>LOC103694398</i>           | keratin-associated protein 10-1-like                                                                                              | -1.49 | 0.0009 |
| <i>LOC100912937</i>           | melanoma antigen preferentially expressed in tumors-like [Source:RGD Symbol;Acc:6485206]                                          | -1.49 | 0.0008 |
| <i>Pcdh9</i>                  | protocadherin beta 9                                                                                                              | -1.49 | 0.0196 |
| <i>Ogn</i>                    | osteoglycin                                                                                                                       | -1.49 | 0.0131 |
| <i>Cdc14a</i>                 | cell division cycle 14A                                                                                                           | -1.49 | 0.0385 |
| <i>Frem3</i>                  | FRAS1 related extracellular matrix 3                                                                                              | -1.50 | 0.0173 |
| <i>Olr718</i>                 | olfactory receptor 718                                                                                                            | -1.50 | 0.0465 |
| <i>RGD1561444</i>             | similar to RIKEN cDNA 9530077C05 [Source:RGD Symbol;Acc:1561444]                                                                  | -1.50 | 0.0169 |
| <i>Dnah5</i>                  | Protein Dnah5                                                                                                                     | -1.50 | 0.0393 |
| <i>Zscan21</i>                | zinc finger and SCAN domain containing 21                                                                                         | -1.50 | 0.0024 |
| <i>Sbp</i>                    | spermine binding protein                                                                                                          | -1.50 | 0.0255 |
| <i>LOC102554689</i>           | uncharacterized LOC102554689                                                                                                      | -1.50 | 0.0216 |
| <i>Mcm7</i>                   | minichromosome maintenance complex component 7                                                                                    | -1.51 | 0.0062 |
| <i>LOC100910689</i>           | cytochrome c oxidase assembly protein COX11, mitochondrial-like [Source:RGD Symbol;Acc:6497536]                                   | -1.51 | 0.0034 |
| <i>RGD1584023</i>             | similar to zinc finger protein 11B                                                                                                | -1.51 | 0.0018 |
| <i>Olr1437</i>                | olfactory receptor 1437                                                                                                           | -1.52 | 0.0500 |
| <i>Ceacam15</i>               | carcinoembryonic antigen-related cell adhesion molecule 15 [Source:MGI Symbol;Acc:MGI:2141810]                                    | -1.53 | 0.0393 |
| <i>LOC688657</i>              | similar to Olfactory receptor 5D13                                                                                                | -1.53 | 0.0103 |
| <i>Olr1697</i>                | olfactory receptor 1697                                                                                                           | -1.54 | 0.0141 |
| <i>Il2rg</i>                  | interleukin 2 receptor, gamma                                                                                                     | -1.55 | 0.0225 |
| <i>Pde6d</i>                  | phosphodiesterase 6D, cGMP-specific, rod, delta                                                                                   | -1.57 | 0.0104 |
| <i>LOC102553768</i>           | uncharacterized LOC102553768                                                                                                      | -1.57 | 0.0091 |
| <i>Olr74</i>                  | olfactory receptor 74                                                                                                             | -1.60 | 0.0323 |
| <i>Rnf212</i>                 | INVOLVED IN chiasma assembly (ortholog)                                                                                           | -1.61 | 0.0036 |
| <i>Mgat4e</i>                 | MGAT4 family, member E                                                                                                            | -1.62 | 0.0008 |
| <i>RGD1561778</i>             | similar to dendritic cell-derived immunoglobulin(Ig)-like receptor 1, DIgR1 - mouse                                               | -1.63 | 0.0063 |
| <i>Nuggc</i>                  | nuclear GTPase, germinal center associated                                                                                        | -1.64 | 0.0013 |
| <i>LOC102551428</i>           | uncharacterized LOC102551428                                                                                                      | -1.69 | 0.0027 |
| <i>Pdcl2</i>                  | phosducin-like 2                                                                                                                  | -1.69 | 0.0229 |
| <i>Mansc1</i>                 | MANSC domain containing 1                                                                                                         | -1.71 | 0.0069 |
| <i>LOC102546754</i>           | beclin 1-associated autophagy-related key regulator-like                                                                          | -1.72 | 0.0074 |
| <i>Per1</i>                   | period circadian clock 1                                                                                                          | -1.98 | 0.0144 |
| <i>Tsku</i>                   | tsukushi, small leucine rich proteoglycan                                                                                         | -2.95 | 0.0045 |

**Table S3      Fold change (FC) and *P*-value of all differentially expressed transcripts (FC > 1.3 or < -1.3, *P* < 0.05) between groups OE vs. OC**

| Gene Symbol          | Gene Description                                                     | FC   | <i>P</i> -value |
|----------------------|----------------------------------------------------------------------|------|-----------------|
| <i>Gadd45a</i>       | growth arrest and DNA-damage-inducible, alpha                        | 2.57 | 0.0208          |
| <i>Gimd1</i>         | GIMAP family P-loop NTPase domain containing 1                       | 2.32 | 0.0240          |
| <i>Irs2</i>          | insulin receptor substrate 2                                         | 2.27 | 0.0043          |
| <i>Pdk4</i>          | pyruvate dehydrogenase kinase, isozyme 4                             | 2.19 | 0.0225          |
| <i>Slc22a8</i>       | solute carrier family 22 (organic anion transporter), member 8       | 2.17 | 0.0450          |
| <i>LOC100911413</i>  | deleted in malignant brain tumors 1 protein-like                     | 2.01 | 0.0070          |
| <i>Igkc</i>          | immunoglobulin kappa constant [Source:MGI Symbol;Acc:MGI:96495]      | 1.97 | 0.0109          |
| <i>Zfp467</i>        | zinc finger protein 467                                              | 1.88 | 0.0166          |
| <i>LOC102549464</i>  | TBC1 domain family member 14-like                                    | 1.86 | 0.0101          |
| <i>Junb</i>          | jun B proto-oncogene                                                 | 1.83 | 0.0160          |
| <i>Eml5</i>          | echinoderm microtubule associated protein like 5                     | 1.76 | 0.0074          |
| <i>Ptd1</i>          | phosphotyrosine interaction domain containing 1                      | 1.75 | 0.0014          |
| <i>Siglech</i>       | sialic acid binding Ig-like lectin H [Source:RGD Symbol;Acc:1310401] | 1.74 | 0.0086          |
| <i>RGD1565806</i>    | similar to 60S ribosomal protein L23a                                | 1.74 | 0.0047          |
| <i>Slc22a25</i>      | solute carrier family 22, member 25                                  | 1.72 | 0.0267          |
| <i>LOC100912707</i>  | Ig kappa chain V19-17-like [Source:RGD Symbol;Acc:6485939]           | 1.69 | 0.0334          |
| <i>Aim2</i>          | absent in melanoma 2                                                 | 1.67 | 0.0067          |
| <i>NONMMUG023325</i> | Non-coding transcript identified by NONCODE: Sense No Exonic         | 1.66 | 0.0100          |
| <i>Anxa1</i>         | annexin A1                                                           | 1.66 | 0.0049          |
| <i>Spry2</i>         | sprouty RTK signaling antagonist 2                                   | 1.66 | 0.0118          |
| <i>Edaradd</i>       | EDAR-associated death domain                                         | 1.64 | 0.0196          |
| <i>LOC689303</i>     | similar to vitamin A-deficient testicular protein 11-like            | 1.64 | 0.0457          |
| <i>LOC100910120</i>  | olfactory receptor 8D1-like                                          | 1.63 | 0.0248          |
| <i>Wdr90</i>         | WD repeat domain 90                                                  | 1.63 | 0.0037          |
| <i>LOC24906</i>      | RoBo-1                                                               | 1.62 | 0.0348          |
| <i>Spag8</i>         | sperm associated antigen 8                                           | 1.62 | 0.0049          |
| <i>Fam57a</i>        | family with sequence similarity 57, member A                         | 1.61 | 0.0256          |
| <i>Cyld</i>          | cylindromatosis (turban tumor syndrome) (Cyld), mRNA.                | 1.60 | 0.0115          |
| ---                  | Protein LOC502908                                                    | 1.60 | 0.0230          |
| <i>LOC499136</i>     | LRRGT00021                                                           | 1.59 | 0.0037          |
| <i>LOC102549637</i>  | filaggrin-2-like                                                     | 1.59 | 0.0317          |
| <i>Sgol1</i>         | shugoshin-like 1 ( <i>S. pombe</i> )                                 | 1.59 | 0.0108          |
| <i>RGD1565088</i>    | similar to UPF0197 protein C11orf10 homolog                          | 1.58 | 0.0390          |
| <i>Anxa8</i>         | annexin A8                                                           | 1.57 | 0.0498          |
| <i>Atad2</i>         | ATPase family, AAA domain containing 2                               | 1.57 | 0.0125          |
| <i>Tmem159</i>       | transmembrane protein 159                                            | 1.57 | 0.0330          |
| <i>LOC100911032</i>  | uncharacterized LOC100911032                                         | 1.57 | 0.0168          |
| <i>Pkn3</i>          | protein kinase N3                                                    | 1.57 | 0.0366          |
| <i>Isg20</i>         | interferon stimulated exonuclease gene 20                            | 1.56 | 0.0089          |
| <i>Mc4r</i>          | melanocortin 4 receptor                                              | 1.56 | 0.0094          |
| <i>Gzmc</i>          | granzyme C                                                           | 1.56 | 0.0014          |
| <i>RGD1563645</i>    | granzyme C ( <i>Gzmc</i> ), mRNA                                     | 1.56 | 0.0014          |
| <i>NONMMUG022196</i> | Non-coding transcript identified by NONCODE: Exonic                  | 1.56 | 0.0149          |
| <i>Gsap</i>          | gamma-secretase activating protein                                   | 1.55 | 0.0128          |
| <i>Nedd9</i>         | neural precursor cell expressed, developmentally down-regulated 9    | 1.55 | 0.0402          |
| <i>Pcdh15</i>        | protocadherin 15                                                     | 1.55 | 0.0108          |
| <i>Net1</i>          | neuroepithelial cell transforming 1                                  | 1.55 | 0.0042          |
| <i>Clstn1</i>        | calsyntenin 1                                                        | 1.55 | 0.0156          |
| <i>Unc79</i>         | INVOLVED IN adult behavior (ortholog)                                | 1.55 | 0.0133          |

|                     |                                                                                                                              |      |        |
|---------------------|------------------------------------------------------------------------------------------------------------------------------|------|--------|
| <i>Tas2r120</i>     | taste receptor, type 2, member 120                                                                                           | 1.54 | 0.0447 |
| <i>Polr2l</i>       | polymerase (RNA) II (DNA directed) polypeptide L (Polr2l), mRNA                                                              | 1.54 | 0.0131 |
| <i>Csn1s1</i>       | casein alpha s1                                                                                                              | 1.54 | 0.0007 |
| <i>LOC681193</i>    | ENCODES a protein that exhibits DNA binding (inferred)                                                                       | 1.54 | 0.0036 |
| <i>Bcl2l11</i>      | BCL2-like 11 (apoptosis facilitator)                                                                                         | 1.54 | 0.0224 |
| <i>Grk4</i>         | G protein-coupled receptor kinase 4                                                                                          | 1.54 | 0.0052 |
| <i>Atf7</i>         | activating transcription factor 7                                                                                            | 1.54 | 0.0003 |
| <i>Map1lc3a</i>     | microtubule-associated protein 1 light chain 3 alpha                                                                         | 1.54 | 0.0035 |
| <i>LOC102548427</i> | uncharacterized LOC102548427                                                                                                 | 1.53 | 0.0476 |
| <i>Amigo2</i>       | adhesion molecule with Ig like domain 2                                                                                      | 1.53 | 0.0341 |
| <i>Rcan1</i>        | regulator of calcineurin 1                                                                                                   | 1.53 | 0.0325 |
| <i>Leng8</i>        | leukocyte receptor cluster (LRC) member 8                                                                                    | 1.53 | 0.0108 |
| <i>Olr281</i>       | olfactory receptor 281                                                                                                       | 1.53 | 0.0009 |
| <i>Esrrg</i>        | estrogen-related receptor gamma                                                                                              | 1.52 | 0.0121 |
| <i>Tas2r143</i>     | ENCODES a protein that exhibits G-protein coupled receptor activity (inferred)                                               | 1.52 | 0.0161 |
| <i>Cers3</i>        | ceramide synthase 3                                                                                                          | 1.51 | 0.0285 |
| <i>Dock2</i>        | dedicator of cytokinesis 2 [Source:RGD Symbol;Acc:1564189]                                                                   | 1.51 | 0.0351 |
| <i>Nav1</i>         | neuron navigator 1                                                                                                           | 1.51 | 0.0446 |
| <i>LOC102552246</i> | uncharacterized LOC102552246                                                                                                 | 1.51 | 0.0181 |
| <i>Irak3</i>        | interleukin-1 receptor-associated kinase 3                                                                                   | 1.51 | 0.0384 |
| <i>Olr696</i>       | olfactory receptor 696                                                                                                       | 1.51 | 0.0198 |
| <i>Hmgb2l1</i>      | high mobility group box 2-like 1                                                                                             | 1.50 | 0.0084 |
| <i>RGD1565590</i>   | INTERACTS WITH thioacetamide                                                                                                 | 1.50 | 0.0163 |
| <i>A2m</i>          | alpha-2-macroglobulin (A2m), mRNA                                                                                            | 1.50 | 0.0301 |
| <i>LOC102551659</i> | MLV-related proviral Env polyprotein-like                                                                                    | 1.49 | 0.0274 |
| <i>LOC102554723</i> | uncharacterized LOC102554723                                                                                                 | 1.49 | 0.0096 |
| <i>Zfp37</i>        | zinc finger protein 37                                                                                                       | 1.49 | 0.0452 |
| <i>Prr16</i>        | proline rich 16                                                                                                              | 1.49 | 0.0126 |
| <i>Nisch</i>        | nischarin [Source:RGD Symbol;Acc:1306950]                                                                                    | 1.49 | 0.0055 |
| <i>Eda2r</i>        | ectodysplasin A2 receptor                                                                                                    | 1.48 | 0.0340 |
| <i>Zbtb42</i>       | zinc finger and BTB domain containing 42                                                                                     | 1.48 | 0.0359 |
| <i>Fam168b</i>      | family with sequence similarity 168, member B                                                                                | 1.48 | 0.0161 |
| <i>Fndc3b</i>       | fibronectin type III domain containing 3B                                                                                    | 1.48 | 0.0009 |
| <i>Abo</i>          | ABO blood group (transferase A, alpha 1-3-N-acetylgalactosaminyltransferase; transferase B, alpha 1-3-galactosyltransferase) | 1.48 | 0.0231 |
| <i>LOC680097</i>    | similar to germinal histone H4 gene                                                                                          | 1.48 | 0.0077 |
| <i>Rps27l</i>       | ribosomal protein S27-like                                                                                                   | 1.48 | 0.0224 |
| <i>Lst1</i>         | leukocyte specific transcript 1                                                                                              | 1.47 | 0.0021 |
| <i>Nox4</i>         | NADPH oxidase 4                                                                                                              | 1.47 | 0.0481 |
| <i>Uvssa</i>        | UV-stimulated scaffold protein A                                                                                             | 1.47 | 0.0253 |
| <i>Mib2</i>         | mindbomb E3 ubiquitin protein ligase 2                                                                                       | 1.47 | 0.0079 |
| <i>LOC102556253</i> | tudor domain-containing protein 15-like                                                                                      | 1.47 | 0.0116 |
| <i>Scgb1c1</i>      | secretoglobin, family 1C, member 1                                                                                           | 1.47 | 0.0403 |
| <i>Olr1505</i>      | olfactory receptor 1505                                                                                                      | 1.47 | 0.0028 |
| <i>Foxo3</i>        | forkhead box O3                                                                                                              | 1.47 | 0.0081 |
| <i>Vars2</i>        | valyl-tRNA synthetase 2, mitochondrial                                                                                       | 1.46 | 0.0032 |
| <i>RGD1563104</i>   | similar to Vigilin (High density lipoprotein-binding protein)                                                                | 1.46 | 0.0486 |
| <i>Fam81b</i>       | family with sequence similarity 81, member B                                                                                 | 1.46 | 0.0270 |
| <i>Ddb2</i>         | damage specific DNA binding protein 2                                                                                        | 1.46 | 0.0403 |
| <i>Tesb</i>         | testis specific basic protein                                                                                                | 1.46 | 0.0125 |
| <i>LOC102546342</i> | uncharacterized LOC102546342                                                                                                 | 1.46 | 0.0032 |
| <i>Xkrx</i>         | XK, Kell blood group complex subunit-related, X-linked                                                                       | 1.46 | 0.0209 |

|                     |                                                                                                |      |        |
|---------------------|------------------------------------------------------------------------------------------------|------|--------|
| <i>Olr1653</i>      | olfactory receptor 1653                                                                        | 1.46 | 0.0267 |
| <i>Slc17a2</i>      | solute carrier family 17, member 2                                                             | 1.46 | 0.0141 |
| <i>RGD1562035</i>   | INTERACTS WITH mercaptopurine AND purine-6-thiol AND benzo[a]pyrene (ortholog)                 | 1.46 | 0.0210 |
| <i>Zfp692</i>       | zinc finger protein 692                                                                        | 1.45 | 0.0336 |
| <i>Cep112</i>       | centrosomal protein 112kDa                                                                     | 1.45 | 0.0037 |
| <i>Usp40</i>        | ubiquitin specific peptidase 40                                                                | 1.45 | 0.0078 |
| ---                 | ---                                                                                            | 1.45 | 0.0375 |
| <i>Tpbpa</i>        | trophoblast specific protein alpha                                                             | 1.45 | 0.0467 |
| <i>Olr67</i>        | olfactory receptor 67                                                                          | 1.45 | 0.0349 |
| <i>Arhgap15</i>     | Rho GTPase activating protein 15                                                               | 1.45 | 0.0201 |
| ---                 | Protein LOC100362092                                                                           | 1.45 | 0.0256 |
| <i>LOC102548194</i> | TBC1 domain family member 30-like                                                              | 1.45 | 0.0226 |
| <i>LOC102548194</i> | TBC1 domain family member 30-like                                                              | 1.45 | 0.0226 |
| <i>Ddx17</i>        | DEAD (Asp-Glu-Ala-Asp) box helicase 17                                                         | 1.45 | 0.0183 |
| <i>LOC102546322</i> | COPII coat assembly protein sec16-like                                                         | 1.45 | 0.0056 |
| <i>LOC310926</i>    | hypothetical protein LOC310926                                                                 | 1.44 | 0.0432 |
| <i>Uqcr11</i>       | ubiquinol-cytochrome c reductase, complex III subunit XI                                       | 1.44 | 0.0369 |
| <i>Mllt6</i>        | myeloid/lymphoid or mixed-lineage leukemia (trithorax homolog, Drosophila); translocated to, 6 | 1.44 | 0.0119 |
| <i>Clec2l</i>       | C-type lectin domain family 2, member L                                                        | 1.44 | 0.0154 |
| <i>Lrrc23</i>       | leucine rich repeat containing 23                                                              | 1.44 | 0.0245 |
| <i>Ccnl1</i>        | cyclin L1                                                                                      | 1.44 | 0.0004 |
| ---                 | Protein Dnhd1-ps1                                                                              | 1.44 | 0.0158 |
| <i>Olr375</i>       | olfactory receptor 375                                                                         | 1.44 | 0.0225 |
| <i>Lyzl1</i>        | lysozyme-like 1                                                                                | 1.43 | 0.0169 |
| <i>Fgl1</i>         | fibrinogen-like 1                                                                              | 1.43 | 0.0112 |
| <i>Fam117b</i>      | family with sequence similarity 117, member B                                                  | 1.43 | 0.0185 |
| <i>LOC102554977</i> | INTERACTS WITH cisplatin (ortholog) AND progesterone (ortholog)                                | 1.43 | 0.0382 |
| <i>LOC102549203</i> | uncharacterized LOC102549203                                                                   | 1.43 | 0.0217 |
| <i>B3galt4</i>      | UDP-Gal:betaGlcNAc beta 1,3-galactosyltransferase, polypeptide 4                               | 1.43 | 0.0488 |
| <i>Dgkh</i>         | diacylglycerol kinase, eta                                                                     | 1.43 | 0.0168 |
| <i>RGD1560556</i>   | similar to C14orf25 protein                                                                    | 1.42 | 0.0121 |
| <i>LOC688442</i>    | similar to limkain b1                                                                          | 1.42 | 0.0028 |
| <i>Vom2r52</i>      | vomer nasal 2 receptor, 52                                                                     | 1.42 | 0.0137 |
| <i>Vom2r27</i>      | vomer nasal 2 receptor, 27                                                                     | 1.42 | 0.0214 |
| <i>Mllt4</i>        | myeloid/lymphoid or mixed-lineage leukemia; translocated to, 4                                 | 1.42 | 0.0309 |
| <i>Klf12</i>        | Kruppel-like factor 12                                                                         | 1.42 | 0.0032 |
| <i>Anks1a</i>       | ankyrin repeat and sterile alpha motif domain containing 1A                                    | 1.42 | 0.0033 |
| <i>A2m</i>          | alpha-2-macroglobulin                                                                          | 1.42 | 0.0423 |
| <i>Stxbp5l</i>      | syntaxin binding protein 5-like                                                                | 1.42 | 0.0375 |
| <i>Olr281</i>       | olfactory receptor 281 (Olr281), mRNA                                                          | 1.42 | 0.0021 |
| <i>Cebpd</i>        | CCAAT/enhancer binding protein (C/EBP), delta                                                  | 1.42 | 0.0401 |
| <i>Pafah1b3</i>     | platelet-activating factor acetylhydrolase 1b, catalytic subunit 3                             | 1.42 | 0.0032 |
| <i>Polr2l</i>       | polymerase (RNA) II (DNA directed) polypeptide L                                               | 1.42 | 0.0345 |
| <i>LOC497940</i>    | similar to RIKEN cDNA 2810408A11                                                               | 1.42 | 0.0048 |
| <i>RGD1560883</i>   | similar to KIAA0825 protein [Source:RGD Symbol;Acc:1560883]                                    | 1.42 | 0.0416 |
| <i>Olr300</i>       | olfactory receptor 300                                                                         | 1.42 | 0.0413 |
| <i>Fam219a</i>      | family with sequence similarity 219, member A                                                  | 1.42 | 0.0492 |
| <i>RGD1310081</i>   | similar to hypothetical protein FLJ13231 [Source:RGD Symbol;Acc:1310081]                       | 1.41 | 0.0237 |
| <i>Fos</i>          | FBJ osteosarcoma oncogene                                                                      | 1.41 | 0.0073 |
| <i>Olr1867</i>      | olfactory receptor 1867                                                                        | 1.41 | 0.0193 |
| <i>LOC100911112</i> | uncharacterized LOC100911112                                                                   | 1.41 | 0.0009 |



|                      |                                                                                                            |      |        |
|----------------------|------------------------------------------------------------------------------------------------------------|------|--------|
| <i>LOC102550824</i>  | uncharacterized LOC102550824                                                                               | 1.41 | 0.0351 |
| <i>Dtwd1</i>         | DTW domain containing 1                                                                                    | 1.41 | 0.0086 |
| <i>Adad2</i>         | adenosine deaminase domain containing 2                                                                    | 1.41 | 0.0011 |
| <i>Zp2</i>           | zona pellucida glycoprotein 2 (sperm receptor)                                                             | 1.41 | 0.0480 |
| <i>Mxd1</i>          | max dimerization protein 1                                                                                 | 1.41 | 0.0464 |
| ---                  | ---                                                                                                        | 1.41 | 0.0010 |
| <i>Snrpc</i>         | small nuclear ribonucleoprotein polypeptide C                                                              | 1.41 | 0.0145 |
| <i>Igfl3</i>         | IGF-like family member 3                                                                                   | 1.41 | 0.0331 |
| <i>Olr1591</i>       | olfactory receptor 1591                                                                                    | 1.41 | 0.0010 |
| <i>Rnf43</i>         | ring finger protein 43                                                                                     | 1.41 | 0.0229 |
| <i>Olr70</i>         | olfactory receptor 70                                                                                      | 1.41 | 0.0327 |
| <i>Traf3ip3</i>      | TRAF3 interacting protein 3                                                                                | 1.41 | 0.0301 |
| <i>Rab24</i>         | RAB24, member RAS oncogene family                                                                          | 1.41 | 0.0177 |
| <i>Olr1620</i>       | olfactory receptor 1620                                                                                    | 1.41 | 0.0285 |
| <i>C5</i>            | complement component 5                                                                                     | 1.41 | 0.0445 |
| <i>NONMMUG032780</i> | Non-coding transcript identified by NONCODE: Linc                                                          | 1.40 | 0.0265 |
| <i>LOC100363405</i>  | Zfp37 pseudogene                                                                                           | 1.40 | 0.0137 |
| <i>Mcm4</i>          | minichromosome maintenance complex component 4                                                             | 1.40 | 0.0271 |
| <i>Ndufa1</i>        | NADH dehydrogenase (ubiquinone) 1 alpha subcomplex, 1                                                      | 1.40 | 0.0084 |
| <i>LOC681182</i>     | similar to paired immunoglobulin-like type 2 receptor beta [Source:RGD Symbol;Acc:1583509]                 | 1.40 | 0.0486 |
| <i>Syne4</i>         | spectrin repeat containing, nuclear envelope family member 4 [Source:RGD Symbol;Acc:1304580]               | 1.40 | 0.0446 |
| <i>Anlnl1</i>        | anillin, actin binding protein-like 1                                                                      | 1.40 | 0.0112 |
| <i>Tmem92</i>        | INTERACTS WITH 17beta-estradiol (ortholog) AND benzo[a]pyrene (ortholog) AND copper(2+) sulfate (ortholog) | 1.40 | 0.0008 |
| <i>Olr763</i>        | ENCODES a protein that exhibits G-protein coupled receptor activity (inferred)                             | 1.40 | 0.0171 |
| <i>Tmem258</i>       | INTERACTS WITH toluene AND cobalt dichloride (ortholog) AND copper(2+) sulfate (ortholog)                  | 1.40 | 0.0050 |
| <i>Spi1</i>          | Spi-1 proto-oncogene                                                                                       | 1.40 | 0.0261 |
| <i>Irf2bp2</i>       | interferon regulatory factor 2 binding protein 2                                                           | 1.40 | 0.0135 |
| <i>Tcf7l2</i>        | transcription factor 7-like 2 (T-cell specific, HMG-box)                                                   | 1.40 | 0.0085 |
| <i>Olr964</i>        | olfactory receptor 964                                                                                     | 1.40 | 0.0004 |
| <i>LOC102548360</i>  | MLV-related proviral Env polyprotein-like                                                                  | 1.40 | 0.0335 |
| <i>Trak1</i>         | trafficking protein, kinesin binding 1                                                                     | 1.39 | 0.0442 |
| <i>Bdnf</i>          | brain-derived neurotrophic factor                                                                          | 1.39 | 0.0266 |
| <i>Dnah1</i>         | dynein, axonemal, heavy chain 1                                                                            | 1.39 | 0.0030 |
| <i>Prrt4</i>         | proline-rich transmembrane protein 4                                                                       | 1.39 | 0.0316 |
| <i>Zkscan4</i>       | Protein Zfp307                                                                                             | 1.39 | 0.0477 |
| <i>Lrch4</i>         | leucine-rich repeats and calponin homology (CH) domain containing 4                                        | 1.39 | 0.0335 |
| <i>Ppp1r15a</i>      | protein phosphatase 1, regulatory subunit 15A                                                              | 1.39 | 0.0167 |
| <i>Olr1500</i>       | olfactory receptor 1500                                                                                    | 1.39 | 0.0071 |
| <i>Gpatch3</i>       | G patch domain containing 3                                                                                | 1.39 | 0.0450 |
| <i>Mef2d</i>         | myocyte enhancer factor 2D                                                                                 | 1.39 | 0.0065 |
| <i>Fnbp4</i>         | formin binding protein 4                                                                                   | 1.39 | 0.0479 |
| <i>Srsf5</i>         | serine/arginine-rich splicing factor 5                                                                     | 1.39 | 0.0374 |
| <i>LOC102548076</i>  | zinc finger protein 120-like                                                                               | 1.39 | 0.0284 |
| <i>Defb44</i>        | defensin beta 44                                                                                           | 1.39 | 0.0082 |
| <i>Cep170b</i>       | centrosomal protein 170B                                                                                   | 1.39 | 0.0177 |
| <i>Zfp28</i>         | zinc finger protein 28                                                                                     | 1.39 | 0.0476 |
| <i>Cacna1a</i>       | calcium channel, voltage-dependent, P/Q type, alpha 1A subunit                                             | 1.39 | 0.0100 |
| <i>Olr1126</i>       | olfactory receptor 1126                                                                                    | 1.39 | 0.0265 |

|                     |                                                                                                           |      |        |
|---------------------|-----------------------------------------------------------------------------------------------------------|------|--------|
| <i>Arid5b</i>       | AT rich interactive domain 5B (Mrf1 like)                                                                 | 1.39 | 0.0360 |
| <i>Tmem110</i>      | transmembrane protein 110                                                                                 | 1.39 | 0.0096 |
| <i>Tgm1</i>         | transglutaminase 1                                                                                        | 1.39 | 0.0145 |
| <i>Ubp1</i>         | upstream binding protein 1 (LBP-1a)                                                                       | 1.39 | 0.0110 |
| <i>RGD1306091</i>   | PREDICTED: similar to Mixed lineage kinase 4 (RGD1306091), mRNA.                                          | 1.38 | 0.0017 |
| <i>Poldip3</i>      | polymerase (DNA-directed), delta interacting protein 3                                                    | 1.38 | 0.0084 |
| <i>Fam168a</i>      | family with sequence similarity 168, member A                                                             | 1.38 | 0.0204 |
| <i>Hoxa1</i>        | homeo box A1                                                                                              | 1.38 | 0.0469 |
| <i>Rrp9</i>         | ribosomal RNA processing 9, small subunit (SSU) processome component, homolog (yeast)                     | 1.38 | 0.0115 |
| <i>Zmat1</i>        | zinc finger, matrin-type 1                                                                                | 1.38 | 0.0428 |
| <i>LOC102552616</i> | h-2 class I histocompatibility antigen TLA(B) alpha chain-like                                            | 1.38 | 0.0185 |
| <i>Phf13</i>        | PHD finger protein 13                                                                                     | 1.38 | 0.0119 |
| <i>LOC100366231</i> | X-linked lymphocyte-regulated 5C-like [Source:RGD Symbol;Acc:2324027]                                     | 1.38 | 0.0084 |
| <i>Eif2b4</i>       | eukaryotic translation initiation factor 2B, subunit 4 delta                                              | 1.38 | 0.0104 |
| <i>LOC102550998</i> | sperm motility kinase 3-like                                                                              | 1.38 | 0.0248 |
| <i>RGD1309110</i>   | similar to Hypothetical protein MGC58999                                                                  | 1.38 | 0.0245 |
| <i>Cbx3</i>         | chromobox homolog 3                                                                                       | 1.38 | 0.0202 |
| <i>Vegfa</i>        | vascular endothelial growth factor A                                                                      | 1.38 | 0.0352 |
| <i>Otp</i>          | orthopedia homeobox                                                                                       | 1.38 | 0.0225 |
| <i>Ajap1</i>        | adherens junction associated protein 1                                                                    | 1.38 | 0.0304 |
| <i>Klre1</i>        | killer cell lectin-like receptor, family E, member 1                                                      | 1.38 | 0.0307 |
| <i>LOC100909879</i> | tyrosine-protein phosphatase non-receptor type substrate 1-like                                           | 1.38 | 0.0139 |
| <i>Ppfia2</i>       | protein tyrosine phosphatase, receptor type, f polypeptide (PTPRF), interacting protein (liprin), alpha 2 | 1.38 | 0.0076 |
| <i>Tslp</i>         | ENCODES a protein that exhibits cytokine activity (ortholog)                                              | 1.38 | 0.0205 |
| <i>LOC102555587</i> | uncharacterized LOC102555587                                                                              | 1.38 | 0.0285 |
| <i>Kctd18</i>       | potassium channel tetramerization domain containing 18                                                    | 1.38 | 0.0041 |
| <i>LOC684819</i>    | ENCODES a protein that exhibits DNA binding (inferred)                                                    | 1.37 | 0.0022 |
| <i>Fastk</i>        | Fas-activated serine/threonine kinase                                                                     | 1.37 | 0.0056 |
| <i>Smc2</i>         | structural maintenance of chromosomes 2                                                                   | 1.37 | 0.0121 |
| <i>Prickle3</i>     | prickle homolog 3                                                                                         | 1.37 | 0.0447 |
| <i>Zfp706</i>       | zinc finger protein 706                                                                                   | 1.37 | 0.0247 |
| <i>Amz1</i>         | archaelysin family metalloproteinase 1                                                                    | 1.37 | 0.0117 |
| <i>Epx</i>          | eosinophil peroxidase                                                                                     | 1.37 | 0.0036 |
| <i>Olr302</i>       | olfactory receptor 302                                                                                    | 1.37 | 0.0011 |
| <i>Ell</i>          | elongation factor RNA polymerase II                                                                       | 1.37 | 0.0440 |
| <i>Adamts9</i>      | ADAM metalloproteinase with thrombospondin type 1 motif, 9                                                | 1.37 | 0.0150 |
| <i>Rad9b</i>        | RAD9 checkpoint clamp component B                                                                         | 1.37 | 0.0496 |
| <i>LOC684932</i>    | similar to Zinc finger protein 75                                                                         | 1.37 | 0.0484 |
| <i>Ggt5</i>         | ENCODES a protein that exhibits gamma-glutamyltransferase activity (ortholog)                             | 1.37 | 0.0299 |
| <i>Jmy</i>          | junction-mediating and regulatory protein                                                                 | 1.37 | 0.0039 |
| <i>Csf1</i>         | colony stimulating factor 1 (macrophage)                                                                  | 1.37 | 0.0019 |
| <i>Fv1</i>          | Friend virus susceptibility 1                                                                             | 1.37 | 0.0225 |
| <i>Ampd1</i>        | adenosine monophosphate deaminase 1                                                                       | 1.37 | 0.0181 |
| <i>Ufm1</i>         | ubiquitin-fold modifier 1                                                                                 | 1.37 | 0.0363 |
| <i>Cetn3</i>        | centrin, EF-hand protein, 3                                                                               | 1.36 | 0.0163 |
| <i>Rims3</i>        | regulating synaptic membrane exocytosis 3                                                                 | 1.36 | 0.0416 |
| <i>Gng4</i>         | guanine nucleotide binding protein (G protein), gamma 4                                                   | 1.36 | 0.0126 |
| <i>Ndufa1</i>       | NADH dehydrogenase (ubiquinone) 1 alpha subcomplex, 1                                                     | 1.36 | 0.0054 |
| <i>LOC300308</i>    | similar to hypothetical protein 4930509O22                                                                | 1.36 | 0.0265 |

|                     |                                                                                                                  |      |        |
|---------------------|------------------------------------------------------------------------------------------------------------------|------|--------|
| <i>Il1rapl1</i>     | interleukin 1 receptor accessory protein-like 1                                                                  | 1.36 | 0.0410 |
| <i>Fbxo25</i>       | F-box protein 25                                                                                                 | 1.36 | 0.0466 |
| <i>Zmyx6</i>        | zinc finger, MYM-type 6                                                                                          | 1.36 | 0.0175 |
| ---                 | Uncharacterized protein                                                                                          | 1.36 | 0.0187 |
| <i>Chac1</i>        | ChaC glutathione-specific gamma-glutamylcyclotransferase 1                                                       | 1.35 | 0.0471 |
| <i>Defb21</i>       | defensin beta 21                                                                                                 | 1.35 | 0.0474 |
| <i>Ankrd33b</i>     | ankyrin repeat domain 33B                                                                                        | 1.35 | 0.0135 |
| <i>Tmem147</i>      | transmembrane protein 147                                                                                        | 1.35 | 0.0084 |
| <i>Ncor2</i>        | nuclear receptor co-repressor 2                                                                                  | 1.35 | 0.0399 |
| <i>Myof</i>         | myoferlin                                                                                                        | 1.35 | 0.0143 |
| <i>Rpgr</i>         | retinitis pigmentosa GTPase regulator                                                                            | 1.35 | 0.0226 |
| <i>Slc38a2</i>      | solute carrier family 38, member 2                                                                               | 1.35 | 0.0451 |
| <i>Olr1358</i>      | olfactory receptor 1358                                                                                          | 1.35 | 0.0486 |
| <i>Klhl33</i>       | kelch-like family member 33 [Source:RGD Symbol;Acc:2324282]                                                      | 1.35 | 0.0256 |
| <i>RGD1565002</i>   | similar to Dehydrogenase/reductase SDR family member 7 precursor (Retinal short-chain dehydrogenase/reductase 4) | 1.35 | 0.0223 |
| <i>Elof1</i>        | ELF1 homolog, elongation factor 1                                                                                | 1.35 | 0.0196 |
| <i>Tmem60</i>       | transmembrane protein 60                                                                                         | 1.35 | 0.0251 |
| <i>Fosl2</i>        | fos-like antigen 2                                                                                               | 1.35 | 0.0354 |
| <i>Hacd1</i>        | 3-hydroxyacyl-CoA dehydratase 1                                                                                  | 1.35 | 0.0068 |
| <i>Mboat2</i>       | membrane bound O-acyltransferase domain containing 2                                                             | 1.35 | 0.0420 |
| <i>Ssh3</i>         | slingshot protein phosphatase 3                                                                                  | 1.35 | 0.0255 |
| <i>LOC102551451</i> | zinc finger protein 665-like                                                                                     | 1.35 | 0.0049 |
| <i>Cd244</i>        | Cd244 molecule, natural killer cell receptor 2B4                                                                 | 1.35 | 0.0481 |
| ---                 | ---                                                                                                              | 1.35 | 0.0402 |
| <i>LOC100909597</i> | WW domain-containing adapter protein with coiled-coil-like                                                       | 1.35 | 0.0037 |
| <i>Olr365</i>       | olfactory receptor 365                                                                                           | 1.35 | 0.0260 |
| <i>Rin3</i>         | Ras and Rab interactor 3                                                                                         | 1.35 | 0.0183 |
| <i>Xpnpep3</i>      | X-prolyl aminopeptidase 3, mitochondrial                                                                         | 1.34 | 0.0190 |
| <i>Ppfbp1</i>       | PTPRF interacting protein, binding protein 1 (liprin beta 1)                                                     | 1.34 | 0.0489 |
| <i>RGD1561114</i>   | similar to hypothetical protein 4930474N05                                                                       | 1.34 | 0.0175 |
| <i>Skint10</i>      | selection and upkeep of intraepithelial T cells 10 [Source:RGD Symbol;Acc:1587504]                               | 1.34 | 0.0379 |
| <i>LOC689757</i>    | similar to osteoclast inhibitory lectin                                                                          | 1.34 | 0.0444 |
| <i>Pkia</i>         | protein kinase (cAMP-dependent, catalytic) inhibitor alpha                                                       | 1.34 | 0.0230 |
| <i>Olr1691</i>      | olfactory receptor 1691                                                                                          | 1.34 | 0.0378 |
| <i>Lpar1</i>        | lysophosphatidic acid receptor 1                                                                                 | 1.34 | 0.0327 |
| <i>Acot8</i>        | acyl-CoA thioesterase 8                                                                                          | 1.34 | 0.0201 |
| <i>Adrm1</i>        | adhesion regulating molecule 1                                                                                   | 1.34 | 0.0431 |
| <i>MGC112715</i>    | hypothetical protein LOC690899                                                                                   | 1.34 | 0.0283 |
| <i>Pnlsr</i>        | PNN-interacting serine/arginine-rich protein                                                                     | 1.34 | 0.0390 |
| <i>Il6st</i>        | interleukin 6 signal transducer                                                                                  | 1.34 | 0.0138 |
| <i>Il7</i>          | interleukin 7                                                                                                    | 1.34 | 0.0122 |
| <i>Olr844</i>       | olfactory receptor 844                                                                                           | 1.34 | 0.0021 |
| <i>Olr964</i>       | olfactory receptor 964                                                                                           | 1.34 | 0.0356 |
| <i>Olr964</i>       | olfactory receptor 964 (Olr964), mRNA                                                                            | 1.34 | 0.0356 |
| <i>Nudt1</i>        | nudix (nucleoside diphosphate linked moiety X)-type motif 1                                                      | 1.34 | 0.0296 |
| <i>Meox1</i>        | mesenchyme homeobox 1                                                                                            | 1.34 | 0.0480 |
| ---                 | Uncharacterized protein                                                                                          | 1.34 | 0.0365 |
| <i>LOC100364062</i> | M2 pyruvate kinase-like                                                                                          | 1.34 | 0.0215 |
| <i>Rybp</i>         | RING1 and YY1 binding protein                                                                                    | 1.34 | 0.0153 |
| <i>Zfp830</i>       | zinc finger protein 830                                                                                          | 1.34 | 0.0404 |
| <i>LOC688442</i>    | similar to limkain b1                                                                                            | 1.34 | 0.0167 |
| <i>LOC500077</i>    | similar to RIKEN cDNA 3110062M04                                                                                 | 1.34 | 0.0159 |

|                      |                                                                                                                                                                |      |        |
|----------------------|----------------------------------------------------------------------------------------------------------------------------------------------------------------|------|--------|
| <i>Tas2r138</i>      | taste receptor, type 2, member 138                                                                                                                             | 1.34 | 0.0090 |
| <i>Fam151b</i>       | family with sequence similarity 151, member B                                                                                                                  | 1.33 | 0.0328 |
| <i>LOC689959</i>     | hypothetical protein LOC689959                                                                                                                                 | 1.33 | 0.0043 |
| <i>Arfgap1</i>       | ADP-ribosylation factor GTPase activating protein 1                                                                                                            | 1.33 | 0.0305 |
| <i>Rabl6</i>         | RAB, member RAS oncogene family-like 6                                                                                                                         | 1.33 | 0.0205 |
| <i>Nfat5</i>         | ENCODES a protein that exhibits DNA binding (ortholog)                                                                                                         | 1.33 | 0.0018 |
| <i>Gpr152</i>        | G protein-coupled receptor 152                                                                                                                                 | 1.33 | 0.0222 |
| <i>Zmym4</i>         | zinc finger, MYM-type 4                                                                                                                                        | 1.33 | 0.0199 |
| <i>Tlr5</i>          | toll-like receptor 5                                                                                                                                           | 1.33 | 0.0249 |
| <i>Tbx10</i>         | T-box 10                                                                                                                                                       | 1.33 | 0.0067 |
| <i>Sycp1</i>         | synaptonemal complex protein 1                                                                                                                                 | 1.33 | 0.0108 |
| <i>Ap4m1</i>         | adaptor-related protein complex 4, mu 1 subunit                                                                                                                | 1.33 | 0.0202 |
| <i>NONMMUG002872</i> | Non-coding transcript identified by NONCODE: Linc                                                                                                              | 1.33 | 0.0367 |
| <i>Ylpm1</i>         | YLP motif containing 1                                                                                                                                         | 1.33 | 0.0407 |
| <i>Mpl</i>           | MPL proto-oncogene, thrombopoietin receptor                                                                                                                    | 1.33 | 0.0365 |
| <i>Dock7</i>         | dedicator of cytokinesis 7                                                                                                                                     | 1.33 | 0.0397 |
| <i>Olr1393</i>       | olfactory receptor 1393                                                                                                                                        | 1.33 | 0.0344 |
| <i>Dennd4b</i>       | DENN/MADD domain containing 4B                                                                                                                                 | 1.33 | 0.0163 |
| <i>Slc25a36l1</i>    | INVOLVED IN transport (inferred) AND FOUND IN integral component of membrane (inferred)                                                                        | 1.33 | 0.0219 |
| <i>Slc22a6</i>       | solute carrier family 22 (organic anion transporter), member 6                                                                                                 | 1.33 | 0.0230 |
| <i>Trim71</i>        | tripartite motif containing 71, E3 ubiquitin protein ligase                                                                                                    | 1.33 | 0.0336 |
| <i>Tsfn</i>          | Ts translation elongation factor, mitochondrial                                                                                                                | 1.33 | 0.0317 |
| <i>Dtx3</i>          | deltex 3, E3 ubiquitin ligase                                                                                                                                  | 1.33 | 0.0437 |
| <i>LOC686911</i>     | similar to Exocyst complex component 1 (Exocyst complex component Sec3)                                                                                        | 1.33 | 0.0172 |
| <i>Osgin2</i>        | oxidative stress induced growth inhibitor family member 2                                                                                                      | 1.32 | 0.0474 |
| <i>Fam64a</i>        | family with sequence similarity 64, member A                                                                                                                   | 1.32 | 0.0284 |
| <i>RGD1566369</i>    | similar to ribosomal protein S8 [Source:RGD Symbol;Acc:1566369]                                                                                                | 1.32 | 0.0247 |
| <i>Hfm1</i>          | HFM1, ATP-dependent DNA helicase homolog                                                                                                                       | 1.32 | 0.0430 |
| <i>Clcn7</i>         | chloride channel, voltage-sensitive 7                                                                                                                          | 1.32 | 0.0133 |
| <i>Tank</i>          | TRAF family member-associated NFKB activator                                                                                                                   | 1.32 | 0.0093 |
| <i>Plekha1</i>       | pleckstrin homology domain containing, family A (phosphoinositide binding specific) member 1                                                                   | 1.32 | 0.0111 |
| <i>Pkp4</i>          | plakophilin 4                                                                                                                                                  | 1.32 | 0.0409 |
| <i>Fap</i>           | fibroblast activation protein, alpha                                                                                                                           | 1.32 | 0.0255 |
| <i>Hist1h2aa</i>     | histone cluster 1, H2aa                                                                                                                                        | 1.32 | 0.0434 |
| <i>Klc2</i>          | kinesin light chain 2                                                                                                                                          | 1.32 | 0.0177 |
| <i>Taf1d</i>         | TATA box binding protein (Tbp)-associated factor, RNA polymerase I, D                                                                                          | 1.32 | 0.0298 |
| <i>Nfat5</i>         | nuclear factor of activated T-cells 5, tonicity-responsive                                                                                                     | 1.32 | 0.0400 |
| <i>Taf4b</i>         | TAF4b RNA polymerase II, TATA box binding protein (TBP)-associated factor, 105kDa                                                                              | 1.32 | 0.0327 |
| <i>Smagp</i>         | small cell adhesion glycoprotein                                                                                                                               | 1.32 | 0.0365 |
| <i>Pex12</i>         | peroxisomal biogenesis factor 12                                                                                                                               | 1.32 | 0.0240 |
| <i>Pfkfb3</i>        | 6-phosphofructo-2-kinase/fructose-2,6-biphosphatase 3                                                                                                          | 1.32 | 0.0272 |
| <i>Dvl1</i>          | dishevelled segment polarity protein 1                                                                                                                         | 1.32 | 0.0054 |
| <i>Tmub1</i>         | transmembrane and ubiquitin-like domain containing 1                                                                                                           | 1.32 | 0.0281 |
| <i>Ccdc89</i>        | coiled-coil domain containing 89 [Source:RGD Symbol;Acc:1305335]                                                                                               | 1.32 | 0.0190 |
| <i>Dcun1d1</i>       | DCN1, defective in cullin neddylation 1, domain containing 1 (S. cerevisiae) (Dcun1d1), mRNA. Chalmel, et. al. Testis-expressed Unannotated Transcripts (TUTs) | 1.32 | 0.0428 |
| <i>LOC684545</i>     | similar to NACHT, leucine rich repeat and PYD containing 2                                                                                                     | 1.32 | 0.0468 |

|                      |                                                                                           |       |        |
|----------------------|-------------------------------------------------------------------------------------------|-------|--------|
| <i>Apbb1</i>         | amyloid beta (A4) precursor protein-binding, family B, member 1 (Fe65)                    | 1.32  | 0.0417 |
| <i>Drp2</i>          | dystrophin related protein 2                                                              | 1.32  | 0.0275 |
| <i>LOC100912377</i>  | uncharacterized LOC100912377                                                              | 1.32  | 0.0015 |
| <i>Tnrc6c</i>        | trinucleotide repeat containing 6C                                                        | 1.31  | 0.0062 |
| <i>Nudt2</i>         | nudix (nucleoside diphosphate linked moiety X)-type motif 2                               | 1.31  | 0.0018 |
| <i>Tspy1</i>         | testis specific protein, Y-linked 1                                                       | 1.31  | 0.0001 |
| <i>Far1</i>          | fatty acyl CoA reductase 1                                                                | 1.31  | 0.0286 |
| <i>LOC100910996</i>  | uncharacterized LOC100910996                                                              | 1.31  | 0.0462 |
| <i>Ofd1</i>          | oral-facial-digital syndrome 1                                                            | 1.31  | 0.0107 |
| <i>Zfp428</i>        | zinc finger protein 428                                                                   | 1.31  | 0.0413 |
| <i>Hoxc8</i>         | homeobox C8                                                                               | 1.31  | 0.0087 |
| <i>Comm1</i>         | copper metabolism (Murr1) domain containing 1                                             | 1.31  | 0.0162 |
| <i>Ptger4</i>        | prostaglandin E receptor 4 (subtype EP4)                                                  | 1.31  | 0.0492 |
| <i>Atmin</i>         | ATM interactor                                                                            | 1.31  | 0.0309 |
| <i>Gtpbp2</i>        | GTP binding protein 2                                                                     | 1.31  | 0.0012 |
| <i>Isy1</i>          | ISY1 splicing factor homolog                                                              | 1.31  | 0.0487 |
| <i>Cd83</i>          | CD83 molecule                                                                             | 1.31  | 0.0251 |
| <i>Srcap</i>         | Snf2-related CREBBP activator protein                                                     | 1.31  | 0.0280 |
| <i>Sh2b1</i>         | SH2B adaptor protein 1                                                                    | 1.31  | 0.0371 |
| <i>NONMMUG043962</i> | Non-coding transcript identified by NONCODE: Linc                                         | 1.31  | 0.0162 |
| <i>Abhd17b</i>       | abhydrolase domain containing 17B                                                         | 1.31  | 0.0381 |
| <i>Nxf1</i>          | nuclear RNA export factor 1                                                               | 1.31  | 0.0235 |
| <i>Scaf4</i>         | SR-related CTD-associated factor 4                                                        | 1.31  | 0.0185 |
| <i>Clrn3</i>         | clarin 3                                                                                  | -1.31 | 0.0013 |
| <i>Atxn7l3b</i>      | ataxin 7-like 3B                                                                          | -1.31 | 0.0096 |
| <i>RGD1562136</i>    | similar to D1Ert622e protein                                                              | -1.31 | 0.0453 |
| <i>LOC100909464</i>  | ENCODES a protein that exhibits protein phosphatase type 2A regulator activity (inferred) | -1.31 | 0.0161 |
| <i>Snx21</i>         | ---                                                                                       | -1.31 | 0.0064 |
| <i>Psg29</i>         | pregnancy-specific glycoprotein 29                                                        | -1.31 | 0.0288 |
| <i>Tyw3</i>          | tRNA-yW synthesizing protein 3 homolog (S. cerevisiae)                                    | -1.31 | 0.0040 |
| <i>Mtch2</i>         | mitochondrial carrier 2                                                                   | -1.31 | 0.0161 |
| <i>Nmnat2</i>        | nicotinamide nucleotide adenylyltransferase 2                                             | -1.31 | 0.0455 |
| <i>Ncstn</i>         | nicastrin                                                                                 | -1.31 | 0.0477 |
| <i>Fgf10</i>         | fibroblast growth factor 10                                                               | -1.31 | 0.0429 |
| <i>Olr162</i>        | olfactory receptor 162                                                                    | -1.31 | 0.0412 |
| <i>RGD1561157</i>    | RGD1561157                                                                                | -1.31 | 0.0080 |
| <i>Sccpdh</i>        | saccharopine dehydrogenase (putative)                                                     | -1.31 | 0.0063 |
| <i>Olr1422</i>       | olfactory receptor 1422                                                                   | -1.31 | 0.0395 |
| <i>Nit2</i>          | nitrilase family, member 2                                                                | -1.31 | 0.0000 |
| <i>LOC102554132</i>  | uncharacterized LOC102554132                                                              | -1.31 | 0.0489 |
| <i>Tktl1</i>         | ENCODES a protein that exhibits catalytic activity (inferred)                             | -1.31 | 0.0063 |
| <i>Muc2</i>          | mucin 2 [Source:MGI Symbol;Acc:MGI:1339364]                                               | -1.31 | 0.0068 |
| <i>Fbxo2</i>         | F-box protein 2                                                                           | -1.31 | 0.0179 |
| <i>Cyb561</i>        | cytochrome b-561                                                                          | -1.31 | 0.0128 |
| <i>Vom1r79</i>       | vomeroneural 1 receptor 79                                                                | -1.31 | 0.0490 |
| <i>Cfap57</i>        | cilia and flagella associated protein 57                                                  | -1.31 | 0.0320 |
| <i>Prrt1</i>         | proline-rich transmembrane protein 1                                                      | -1.31 | 0.0067 |
| <i>Ddx52</i>         | DEAD (Asp-Glu-Ala-Asp) box polypeptide 52                                                 | -1.31 | 0.0500 |
| <i>Trim67</i>        | tripartite motif-containing 67                                                            | -1.31 | 0.0255 |
| <i>Map7d3</i>        | MAP7 domain containing 3                                                                  | -1.31 | 0.0308 |
| <i>Stoml1</i>        | stomatin (EPB72)-like 1                                                                   | -1.31 | 0.0173 |
| <i>Klhl31</i>        | kelch-like family member 31                                                               | -1.31 | 0.0287 |

|                     |                                                                                                                              |       |        |
|---------------------|------------------------------------------------------------------------------------------------------------------------------|-------|--------|
| <i>Acer2</i>        | alkaline ceramidase 2                                                                                                        | -1.31 | 0.0297 |
| <i>Bpgm</i>         | 2,3-bisphosphoglycerate mutase                                                                                               | -1.32 | 0.0291 |
| <i>Sgcg</i>         | sarcoglycan, gamma                                                                                                           | -1.32 | 0.0048 |
| <i>Jph4</i>         | junctophilin 4                                                                                                               | -1.32 | 0.0031 |
| <i>Cd59</i>         | CD59 molecule, complement regulatory protein                                                                                 | -1.32 | 0.0170 |
| ---                 | Uncharacterized protein                                                                                                      | -1.32 | 0.0221 |
| <i>LOC100909612</i> | mitochondrial brown fat uncoupling protein 1-like                                                                            | -1.32 | 0.0419 |
| <i>Olr807</i>       | olfactory receptor 807                                                                                                       | -1.32 | 0.0209 |
| <i>Cthrc1</i>       | collagen triple helix repeat containing 1                                                                                    | -1.32 | 0.0261 |
| <i>Adam10</i>       | ADAM metallopeptidase domain 10                                                                                              | -1.32 | 0.0334 |
| <i>Apobec4</i>      | apolipoprotein B mRNA editing enzyme, catalytic polypeptide-like 4 (putative)                                                | -1.32 | 0.0041 |
| <i>Bmpr2</i>        | bone morphogenetic protein receptor, type II (serine/threonine kinase)                                                       | -1.32 | 0.0212 |
| <i>Rangap1</i>      | RAN GTPase activating protein 1                                                                                              | -1.32 | 0.0398 |
| <i>Wnt2</i>         | Protein Wnt                                                                                                                  | -1.32 | 0.0220 |
| <i>Taar7d</i>       | trace-amine-associated receptor 7d                                                                                           | -1.32 | 0.0348 |
| <i>Fam167b</i>      | family with sequence similarity 167, member B                                                                                | -1.32 | 0.0289 |
| <i>Rps21</i>        | ribosomal protein S21                                                                                                        | -1.32 | 0.0245 |
| <i>Rab5a</i>        | RAB5A, member RAS oncogene family                                                                                            | -1.32 | 0.0275 |
| <i>Tmc3</i>         | transmembrane channel-like 3                                                                                                 | -1.32 | 0.0482 |
| <i>Gng3</i>         | guanine nucleotide binding protein (G protein), gamma 3                                                                      | -1.32 | 0.0315 |
| <i>Olr1306</i>      | olfactory receptor 1306                                                                                                      | -1.33 | 0.0461 |
| <i>Kcng3</i>        | potassium channel, voltage gated modifier subfamily G, member 3                                                              | -1.33 | 0.0024 |
| <i>Sft2d2</i>       | SFT2 domain containing 2                                                                                                     | -1.33 | 0.0050 |
| <i>Ankk1</i>        | ankyrin repeat and kinase domain containing 1                                                                                | -1.33 | 0.0040 |
| <i>LOC100361944</i> | hypothetical protein LOC100361944 [Source:RGD Symbol;Acc:2319136]                                                            | -1.33 | 0.0355 |
| <i>Slc30a6</i>      | solute carrier family 30 (zinc transporter), member 6                                                                        | -1.33 | 0.0308 |
| <i>Tmem178b</i>     | transmembrane protein 178B                                                                                                   | -1.33 | 0.0052 |
| <i>P4ha3</i>        | prolyl 4-hydroxylase, alpha polypeptide III                                                                                  | -1.33 | 0.0065 |
| <i>Ednrb</i>        | endothelin receptor type B                                                                                                   | -1.34 | 0.0096 |
| <i>Fam91a1</i>      | family with sequence similarity 91, member A1                                                                                | -1.34 | 0.0152 |
| <i>Xrcc6</i>        | X-ray repair complementing defective repair in Chinese hamster cells 6                                                       | -1.34 | 0.0194 |
| <i>Hyi</i>          | hydroxypyruvate isomerase                                                                                                    | -1.34 | 0.0181 |
| <i>Tcrb</i>         | T-cell receptor beta chain                                                                                                   | -1.34 | 0.0477 |
| <i>Slc23a1</i>      | solute carrier family 23 (ascorbic acid transporter), member 1                                                               | -1.34 | 0.0408 |
| <i>Ikzf2</i>        | IKAROS family zinc finger 2                                                                                                  | -1.34 | 0.0400 |
| <i>Sh2d6</i>        | SH2 domain containing 6 [Source:RGD Symbol;Acc:1587427]                                                                      | -1.34 | 0.0480 |
| <i>Tom1</i>         | target of myb1 membrane trafficking protein                                                                                  | -1.34 | 0.0228 |
| <i>LOC100911937</i> | ENCODS a protein that exhibits G-protein coupled receptor activity (inferred)                                                | -1.34 | 0.0372 |
| <i>LOC102549389</i> | sarcoplasmic/endoplasmic reticulum calcium ATPase 3-like                                                                     | -1.34 | 0.0110 |
| <i>Tmem158</i>      | transmembrane protein 158                                                                                                    | -1.34 | 0.0496 |
| <i>Slc8a3</i>       | solute carrier family 8 (sodium/calcium exchanger), member 3                                                                 | -1.34 | 0.0373 |
| <i>Ado</i>          | 2-aminoethanethiol (cysteamine) dioxygenase                                                                                  | -1.34 | 0.0292 |
| <i>Ppp1r14d</i>     | protein phosphatase 1, regulatory (inhibitor) subunit 14D                                                                    | -1.34 | 0.0004 |
| <i>Serpinb9</i>     | serpin peptidase inhibitor, clade B (ovalbumin), member 9                                                                    | -1.34 | 0.0102 |
| <i>Krt78</i>        | Protein Krt78                                                                                                                | -1.34 | 0.0460 |
| <i>Thg1l</i>        | tRNA-histidine guanylyltransferase 1-like                                                                                    | -1.34 | 0.0453 |
| <i>Gsta5</i>        | glutathione S-transferase alpha 5                                                                                            | -1.34 | 0.0124 |
| <i>LOC100360477</i> | ENCODS a protein that exhibits hydrolase activity (inferred) AND isopentenyl-diphosphate delta-isomerase activity (inferred) | -1.35 | 0.0238 |
| <i>Ppox</i>         | protoporphyrinogen oxidase                                                                                                   | -1.35 | 0.0425 |

|                     |                                                                                                                                                                                        |       |        |
|---------------------|----------------------------------------------------------------------------------------------------------------------------------------------------------------------------------------|-------|--------|
| <i>Olr91</i>        | olfactory receptor 91                                                                                                                                                                  | -1.35 | 0.0079 |
| <i>Zfp330</i>       | zinc finger protein 330                                                                                                                                                                | -1.35 | 0.0010 |
| <i>Slc35b4</i>      | solute carrier family 35 (UDP-xylose/UDP-N-acetylglucosamine transporter), member B4                                                                                                   | -1.35 | 0.0446 |
| <i>Ric3</i>         | RIC3 acetylcholine receptor chaperone                                                                                                                                                  | -1.35 | 0.0339 |
| <i>Cps1</i>         | carbamoyl-phosphate synthetase 1                                                                                                                                                       | -1.35 | 0.0420 |
| <i>Lcmt1</i>        | leucine carboxyl methyltransferase 1                                                                                                                                                   | -1.35 | 0.0411 |
| <i>Lims1</i>        | LIM and senescent cell antigen-like domains 1                                                                                                                                          | -1.35 | 0.0061 |
| <i>Egflam</i>       | EGF-like, fibronectin type III and laminin G domains                                                                                                                                   | -1.35 | 0.0274 |
| <i>C1qtnf7</i>      | C1q and tumor necrosis factor related protein 7                                                                                                                                        | -1.35 | 0.0278 |
| <i>Pigs</i>         | phosphatidylinositol glycan anchor biosynthesis, class S                                                                                                                               | -1.35 | 0.0417 |
| <i>Enpp1</i>        | ectonucleotide pyrophosphatase/phosphodiesterase 1                                                                                                                                     | -1.35 | 0.0287 |
| <i>Tox</i>          | thymocyte selection-associated high mobility group box                                                                                                                                 | -1.35 | 0.0350 |
| <i>Vom1r13</i>      | vomeroneasal 1 receptor 13                                                                                                                                                             | -1.36 | 0.0155 |
| <i>Gnat2</i>        | guanine nucleotide binding protein (G protein), alpha transducing activity polypeptide 2                                                                                               | -1.36 | 0.0338 |
| <i>Wbscr16</i>      | Williams-Beuren syndrome chromosome region 16                                                                                                                                          | -1.36 | 0.0278 |
| <i>Fbxo3</i>        | F-box protein 3                                                                                                                                                                        | -1.36 | 0.0061 |
| <i>Dyrk4</i>        | dual-specificity tyrosine-(Y)-phosphorylation regulated kinase 4                                                                                                                       | -1.36 | 0.0394 |
| <i>Dbt</i>          | dihydrolipoamide branched chain transacylase E2                                                                                                                                        | -1.36 | 0.0076 |
| <i>Csmd3</i>        | CUB and Sushi multiple domains 3                                                                                                                                                       | -1.36 | 0.0356 |
| <i>RGD1565183</i>   | ENCODES a protein that exhibits structural constituent of ribosome (inferred) AND INVOLVED IN translation (inferred) AND FOUND IN ribosome (inferred) AND INTERACTS WITH C60 fullerene | -1.36 | 0.0251 |
| <i>Slitrk6</i>      | SLIT and NTRK-like family, member 6                                                                                                                                                    | -1.36 | 0.0276 |
| <i>Lpgat1</i>       | lysophosphatidylglycerol acyltransferase 1                                                                                                                                             | -1.36 | 0.0171 |
| <i>Lama2</i>        | laminin, alpha 2                                                                                                                                                                       | -1.36 | 0.0228 |
| <i>Uox</i>          | urate oxidase                                                                                                                                                                          | -1.36 | 0.0174 |
| <i>Syce1</i>        | synaptonemal complex central element protein 1                                                                                                                                         | -1.36 | 0.0158 |
| <i>RGD1560334</i>   | similar to Myosin light chain 1 slow a [Source:RGD Symbol;Acc:1560334]                                                                                                                 | -1.36 | 0.0200 |
| <i>Uhmk1</i>        | U2AF homology motif (UHM) kinase 1                                                                                                                                                     | -1.36 | 0.0365 |
| <i>Il20rb</i>       | interleukin 20 receptor beta                                                                                                                                                           | -1.36 | 0.0046 |
| <i>Vom2r44</i>      | vomeroneasal 2 receptor 44                                                                                                                                                             | -1.36 | 0.0338 |
| <i>Tulp3</i>        | tubby-like protein 3                                                                                                                                                                   | -1.36 | 0.0053 |
| <i>Padi3</i>        | peptidyl arginine deiminase, type III                                                                                                                                                  | -1.36 | 0.0303 |
| <i>Ndufs8</i>       | NADH dehydrogenase (ubiquinone) Fe-S protein 8                                                                                                                                         | -1.36 | 0.0381 |
| <i>LOC685700</i>    | hypothetical protein LOC685700                                                                                                                                                         | -1.37 | 0.0116 |
| <i>Ppm1j</i>        | protein phosphatase, Mg <sup>2+</sup> /Mn <sup>2+</sup> dependent, 1J                                                                                                                  | -1.37 | 0.0255 |
| <i>LOC103692040</i> | olfactory receptor 8B3-like                                                                                                                                                            | -1.37 | 0.0355 |
| <i>Olr1239</i>      | ENCODES a protein that exhibits olfactory receptor activity (inferred)                                                                                                                 | -1.37 | 0.0355 |
| <i>Olr1239</i>      | olfactory receptor 1239                                                                                                                                                                | -1.37 | 0.0355 |
| <i>Stoml2</i>       | stomatin (Epb7.2)-like 2                                                                                                                                                               | -1.37 | 0.0264 |
| <i>LOC102552923</i> | olfactory receptor 8B3-like                                                                                                                                                            | -1.37 | 0.0358 |
| <i>Aplp1</i>        | amyloid beta (A4) precursor-like protein 1                                                                                                                                             | -1.37 | 0.0119 |
| <i>Colq</i>         | collagen-like tail subunit (single strand of homotrimer) of asymmetric acetylcholinesterase                                                                                            | -1.37 | 0.0133 |
| <i>Lzts2</i>        | leucine zipper, putative tumor suppressor 2                                                                                                                                            | -1.37 | 0.0144 |
| <i>Olr812</i>       | olfactory receptor 812                                                                                                                                                                 | -1.37 | 0.0478 |
| <i>Il23r</i>        | interleukin 23 receptor                                                                                                                                                                | -1.37 | 0.0441 |
| <i>Avpr2</i>        | arginine vasopressin receptor 2                                                                                                                                                        | -1.37 | 0.0121 |
| <i>Rab5c</i>        | RAB5C, member RAS oncogene family                                                                                                                                                      | -1.37 | 0.0447 |
| <i>Vwde</i>         | von Willebrand factor D and EGF domains [Source:RGD Symbol;Acc:1561223]                                                                                                                | -1.37 | 0.0257 |

|                     |                                                                                                             |       |        |
|---------------------|-------------------------------------------------------------------------------------------------------------|-------|--------|
| <i>Olr332</i>       | olfactory receptor 332                                                                                      | -1.37 | 0.0210 |
| <i>Usp11</i>        | ubiquitin specific peptidase 11                                                                             | -1.38 | 0.0418 |
| <i>Olr851</i>       | olfactory receptor 851                                                                                      | -1.38 | 0.0042 |
| <i>Lamtor5</i>      | late endosomal/lysosomal adaptor, MAPK and MTOR activator 5                                                 | -1.38 | 0.0331 |
| <i>ErbB4</i>        | erb-b2 receptor tyrosine kinase 4                                                                           | -1.38 | 0.0389 |
| <i>Ociad2</i>       | OCIA domain containing 2                                                                                    | -1.38 | 0.0074 |
| <i>Si</i>           | sucrase-isomaltase (alpha-glucosidase)                                                                      | -1.38 | 0.0410 |
| <i>Npsr1</i>        | neuropeptide S receptor 1                                                                                   | -1.38 | 0.0138 |
| <i>LOC691418</i>    | hypothetical protein LOC691418                                                                              | -1.38 | 0.0485 |
| <i>Dkk2</i>         | dickkopf WNT signaling pathway inhibitor 2                                                                  | -1.38 | 0.0050 |
| <i>LOC102552106</i> | paired immunoglobulin-like type 2 receptor beta-like                                                        | -1.38 | 0.0401 |
| <i>Pex3</i>         | peroxisomal biogenesis factor 3                                                                             | -1.38 | 0.0224 |
| <i>Mrpl16</i>       | mitochondrial ribosomal protein L16                                                                         | -1.38 | 0.0151 |
| <i>LOC291871</i>    | similar to heat shock protein 1 beta                                                                        | -1.38 | 0.0152 |
| <i>Tdh</i>          | L-threonine dehydrogenase                                                                                   | -1.38 | 0.0185 |
| <i>Arsg</i>         | arylsulfatase G                                                                                             | -1.38 | 0.0431 |
| <i>Zfp787</i>       | zinc finger protein 787                                                                                     | -1.38 | 0.0476 |
| <i>Olr1107</i>      | olfactory receptor 1107                                                                                     | -1.38 | 0.0163 |
| <i>Alpp</i>         | alkaline phosphatase, placental                                                                             | -1.38 | 0.0140 |
| <i>Irgq</i>         | immunity-related GTPase family, Q                                                                           | -1.38 | 0.0455 |
| <i>Gabra4</i>       | gamma-aminobutyric acid (GABA) A receptor, alpha 4                                                          | -1.38 | 0.0364 |
| <i>Sostdc1</i>      | sclerostin domain containing 1                                                                              | -1.39 | 0.0319 |
| <i>LOC685463</i>    | similar to Ral guanine nucleotide dissociation stimulator (RalGEF) (RalGDS)                                 | -1.39 | 0.0373 |
| <i>Prl3d4</i>       | prolactin family 3, subfamily d, member 4                                                                   | -1.39 | 0.0127 |
| <i>Cyb5r3</i>       | cytochrome b5 reductase 3                                                                                   | -1.39 | 0.0272 |
| <i>Krtap13-1</i>    | keratin associated protein 13-1                                                                             | -1.39 | 0.0065 |
| <i>Psd2</i>         | pleckstrin and Sec7 domain containing 2                                                                     | -1.39 | 0.0204 |
| <i>Wfdc13</i>       | WAP four-disulfide core domain 13                                                                           | -1.39 | 0.0183 |
| <i>Fasn</i>         | fatty acid synthase                                                                                         | -1.39 | 0.0381 |
| <i>Pga5</i>         | pepsinogen 5, group I (Pga5), mRNA                                                                          | -1.39 | 0.0401 |
| <i>Cmb1</i>         | carboxymethylenebutenolidase homolog (Pseudomonas)                                                          | -1.39 | 0.0295 |
| <i>Acy1</i>         | aminoacylase 1                                                                                              | -1.39 | 0.0321 |
| <i>Sult1b1</i>      | sulfotransferase family, cytosolic, 1B, member 1                                                            | -1.39 | 0.0158 |
| <i>Rnase1l1</i>     | ribonuclease, RNase A family, 1-like 1 (pancreatic)                                                         | -1.39 | 0.0186 |
| <i>Tex13</i>        | testis expressed gene 13                                                                                    | -1.39 | 0.0439 |
| <i>Olr1246</i>      | olfactory receptor 1246 [Source:RGD Symbol;Acc:1334003]                                                     | -1.39 | 0.0274 |
| <i>Olr1246</i>      | olfactory receptor 1246                                                                                     | -1.39 | 0.0274 |
| <i>Dhcr24</i>       | 24-dehydrocholesterol reductase                                                                             | -1.39 | 0.0284 |
| <i>Stk33</i>        | serine/threonine kinase 33                                                                                  | -1.39 | 0.0324 |
| <i>St6galnac3</i>   | ST6 (alpha-N-acetyl-neuraminy-2,3-beta-galactosyl-1,3)-N-acetylglactosaminide alpha-2,6-sialyltransferase 3 | -1.39 | 0.0042 |
| <i>Pgbd5</i>        | piggyBac transposable element derived 5                                                                     | -1.39 | 0.0073 |
| <i>Lix1l</i>        | Lix1-like                                                                                                   | -1.39 | 0.0341 |
| <i>Zfp108</i>       | zinc finger protein 108 (Zfp108), mRNA.                                                                     | -1.39 | 0.0429 |
| <i>Eva1a</i>        | eva-1 homolog A                                                                                             | -1.40 | 0.0320 |
| <i>Olr247</i>       | olfactory receptor 247                                                                                      | -1.40 | 0.0436 |
| <i>Tmem181</i>      | transmembrane protein 181                                                                                   | -1.40 | 0.0364 |
| <i>Iars2</i>        | isoleucyl-tRNA synthetase 2, mitochondrial [Source:RGD Symbol;Acc:1311857]                                  | -1.40 | 0.0157 |
| <i>Heatr1</i>       | HEAT repeat containing 1                                                                                    | -1.40 | 0.0268 |
| <i>Foxa3</i>        | forkhead box A3                                                                                             | -1.40 | 0.0064 |
| <i>Slc44a4</i>      | solute carrier family 44, member 4                                                                          | -1.40 | 0.0118 |
| <i>Tbxas1</i>       | thromboxane A synthase 1, platelet                                                                          | -1.40 | 0.0341 |



|                     |                                                                                                                |       |        |
|---------------------|----------------------------------------------------------------------------------------------------------------|-------|--------|
| <i>Rec114</i>       | REC114 meiotic recombination protein                                                                           | -1.40 | 0.0237 |
| <i>Zc2hc1b</i>      | zinc finger, C2HC-type containing 1B                                                                           | -1.40 | 0.0074 |
| <i>Prss12</i>       | protease, serine, 12 neurotrypsin (motopsin)                                                                   | -1.40 | 0.0140 |
| <i>RGD1559588</i>   | similar to cell surface receptor FDFACT [Source:RGD Symbol;Acc:1559588]                                        | -1.40 | 0.0016 |
| <i>Gp2</i>          | glycoprotein 2 (zymogen granule membrane)                                                                      | -1.40 | 0.0177 |
| <i>Ap2a2</i>        | adaptor-related protein complex 2, alpha 2 subunit                                                             | -1.40 | 0.0117 |
| <i>Lrrn1</i>        | leucine rich repeat neuronal 1                                                                                 | -1.40 | 0.0290 |
| <i>Cd93</i>         | CD93 molecule                                                                                                  | -1.40 | 0.0061 |
| <i>LOC102547532</i> | paired immunoglobulin-like type 2 receptor beta-like                                                           | -1.40 | 0.0322 |
| <i>Ano3</i>         | anoctamin 3                                                                                                    | -1.41 | 0.0074 |
| <i>Mfsd7</i>        | major facilitator superfamily domain containing 7                                                              | -1.41 | 0.0032 |
| <i>Rnase2</i>       | ribonuclease, RNase A family, 2 (liver, eosinophil-derived neurotoxin)                                         | -1.41 | 0.0379 |
| <i>Bles03</i>       | basophilic leukemia expressed protein BLES03                                                                   | -1.41 | 0.0310 |
| <i>RGD1559683</i>   | similar to RIKEN cDNA 1700001C02                                                                               | -1.41 | 0.0240 |
| <i>LOC100910256</i> | INTERACTS WITH crocidolite asbestos (ortholog)                                                                 | -1.41 | 0.0277 |
| <i>Olr1275</i>      | ENCODES a protein that exhibits olfactory receptor activity (inferred)                                         | -1.41 | 0.0277 |
| <i>LOC100910445</i> | INTERACTS WITH crocidolite asbestos (ortholog)                                                                 | -1.41 | 0.0277 |
| <i>Gsta2</i>        | ENCODES a protein that exhibits drug binding AND glutathione binding AND glutathione transferase activity      | -1.41 | 0.0048 |
| <i>Olr397</i>       | olfactory receptor 397                                                                                         | -1.41 | 0.0091 |
| <i>Vgll1</i>        | INTERACTS WITH diuron AND 17alpha-ethynylestradiol (ortholog) AND 2 3 7 8-tetrachlorodibenzodioxine (ortholog) | -1.42 | 0.0476 |
| <i>Six6os1</i>      | Six6 opposite strand transcript 1                                                                              | -1.42 | 0.0220 |
| <i>Agr3</i>         | anterior gradient 3, protein disulphide isomerase family member                                                | -1.42 | 0.0359 |
| <i>Efna4</i>        | ephrin A4                                                                                                      | -1.42 | 0.0008 |
| <i>Ttyh2</i>        | tweety family member 2                                                                                         | -1.42 | 0.0285 |
| <i>Barx1</i>        | BARX homeobox 1                                                                                                | -1.43 | 0.0030 |
| <i>Idh3B</i>        | isocitrate dehydrogenase 3 (NAD+) beta                                                                         | -1.43 | 0.0402 |
| <i>Nme3</i>         | NME/NM23 nucleoside diphosphate kinase 3                                                                       | -1.43 | 0.0146 |
| <i>Trmt2a</i>       | tRNA methyltransferase 2 homolog A                                                                             | -1.43 | 0.0204 |
| <i>RGD1565054</i>   | similar to 60S acidic ribosomal protein P1                                                                     | -1.43 | 0.0042 |
| <i>Adam28</i>       | ADAM metallopeptidase domain 28                                                                                | -1.43 | 0.0113 |
| <i>Rps29</i>        | ribosomal protein S29                                                                                          | -1.43 | 0.0208 |
| <i>Rrs1</i>         | ribosome biogenesis regulator homolog                                                                          | -1.43 | 0.0141 |
| <i>LOC688702</i>    | similar to RIKEN cDNA 1700001F22                                                                               | -1.43 | 0.0009 |
| <i>Pus1</i>         | pseudouridylate synthase 1                                                                                     | -1.43 | 0.0179 |
| <i>Ccdc110</i>      | coiled-coil domain containing 110                                                                              | -1.43 | 0.0245 |
| <i>Tst</i>          | thiosulfate sulfurtransferase                                                                                  | -1.43 | 0.0248 |
| <i>Cyp2a3</i>       | cytochrome P450, family 2, subfamily a, polypeptide 3                                                          | -1.44 | 0.0029 |
| <i>Olr409</i>       | olfactory receptor 409                                                                                         | -1.44 | 0.0236 |
| <i>Olr1602</i>      | olfactory receptor 1602                                                                                        | -1.44 | 0.0073 |
| <i>LOC100910335</i> | INTERACTS WITH crocidolite asbestos (ortholog)                                                                 | -1.44 | 0.0153 |
| <i>Olr1275</i>      | olfactory receptor 1275                                                                                        | -1.44 | 0.0153 |
| <i>Stx19</i>        | syntaxin 19                                                                                                    | -1.44 | 0.0360 |
| <i>Sigirr</i>       | single immunoglobulin and toll-interleukin 1 receptor (TIR) domain                                             | -1.44 | 0.0037 |
| <i>Ppp2r3c</i>      | protein phosphatase 2, regulatory subunit B, gamma                                                             | -1.44 | 0.0417 |
| <i>Abhd11</i>       | abhydrolase domain containing 11                                                                               | -1.44 | 0.0316 |
| <i>Hapln1</i>       | hyaluronan and proteoglycan link protein 1                                                                     | -1.44 | 0.0220 |
| <i>St8sia6</i>      | ST8 alpha-N-acetyl-neuraminide alpha-2,8-sialyltransferase 6                                                   | -1.44 | 0.0153 |
| <i>Rps29</i>        | ribosomal protein S29 [Source:RGD Symbol;Acc:3596]                                                             | -1.44 | 0.0192 |
| <i>Plbd1</i>        | phospholipase B domain containing 1                                                                            | -1.45 | 0.0384 |
| <i>l7Rn6</i>        | lethal, Chr 7, Rinchik 6                                                                                       | -1.45 | 0.0121 |
| <i>Olr1622</i>      | olfactory receptor 1622                                                                                        | -1.45 | 0.0058 |

|                     |                                                                               |       |        |
|---------------------|-------------------------------------------------------------------------------|-------|--------|
| <i>Olr727</i>       | olfactory receptor 727                                                        | -1.45 | 0.0492 |
| <i>LOC100910833</i> | histone-lysine N-methyltransferase setd3-like                                 | -1.45 | 0.0033 |
| <i>Gstm7</i>        | glutathione S-transferase, mu 7                                               | -1.45 | 0.0141 |
| <i>Olr1701</i>      | olfactory receptor 1701                                                       | -1.45 | 0.0178 |
| <i>Mmp10</i>        | matrix metalloproteinase 10                                                   | -1.45 | 0.0461 |
| <i>Plpp2</i>        | phospholipid phosphatase 2                                                    | -1.45 | 0.0354 |
| <i>Ndufa8</i>       | NADH dehydrogenase (ubiquinone) 1 alpha subcomplex, 8                         | -1.45 | 0.0280 |
| <i>Fam161b</i>      | family with sequence similarity 161, member B [Source:RGD Symbol;Acc:1309058] | -1.45 | 0.0126 |
| <i>Gys1</i>         | glycogen synthase 1, muscle                                                   | -1.45 | 0.0156 |
| <i>LOC100912165</i> | rho guanine nucleotide exchange factor 9-like                                 | -1.45 | 0.0451 |
| <i>LOC102552920</i> | armadillo repeat-containing X-linked protein 5-like                           | -1.45 | 0.0299 |
| <i>Creg1</i>        | cellular repressor of E1A-stimulated genes 1                                  | -1.45 | 0.0086 |
| <i>Tpsg1</i>        | tryptase gamma 1                                                              | -1.46 | 0.0246 |
| <i>Stxbp6</i>       | syntrophin binding protein 6 (amisyn)                                         | -1.46 | 0.0192 |
| <i>Lyzl6</i>        | lysozyme-like 6                                                               | -1.46 | 0.0304 |
| <i>Haus1</i>        | HAUS augmin-like complex, subunit 1 (Haus1), mRNA                             | -1.46 | 0.0021 |
| <i>LOC100912361</i> | 16.5 kDa submandibular gland glycoprotein-like                                | -1.46 | 0.0396 |
| <i>Ubxn8</i>        | UBX domain protein 8                                                          | -1.46 | 0.0251 |
| <i>Olr1148</i>      | olfactory receptor 1148                                                       | -1.46 | 0.0459 |
| <i>Prcp</i>         | prolylcarboxypeptidase (angiotensinase C)                                     | -1.47 | 0.0318 |
| <i>Reep6</i>        | receptor accessory protein 6                                                  | -1.47 | 0.0177 |
| <i>LOC100363116</i> | INTERACTS WITH copper(2+) sulfate (ortholog) AND valproic acid (ortholog)     | -1.47 | 0.0237 |
| <i>Olr1142</i>      | olfactory receptor 1142                                                       | -1.47 | 0.0015 |
| <i>Elp5</i>         | elongator acetyltransferase complex subunit 5                                 | -1.48 | 0.0225 |
| <i>Olr1368</i>      | olfactory receptor 1368                                                       | -1.48 | 0.0002 |
| <i>Far2</i>         | fatty acyl CoA reductase 2                                                    | -1.48 | 0.0148 |
| <i>Siva1</i>        | SIVA1, apoptosis-inducing factor                                              | -1.48 | 0.0136 |
| <i>Desi1</i>        | desumoylating isopeptidase 1                                                  | -1.48 | 0.0177 |
| <i>Fut11</i>        | fucosyltransferase 11 (alpha (1,3) fucosyltransferase)                        | -1.49 | 0.0283 |
| <i>Rps29</i>        | ribosomal protein S29 [Source:RGD Symbol;Acc:3596]                            | -1.49 | 0.0353 |
| <i>C1qtnf3</i>      | C1q and tumor necrosis factor related protein 3                               | -1.49 | 0.0081 |
| <i>Zfp133</i>       | zinc finger protein 133                                                       | -1.49 | 0.0075 |
| <i>Bche</i>         | butyrylcholinesterase                                                         | -1.49 | 0.0096 |
| <i>E2f7</i>         | E2F transcription factor 7                                                    | -1.50 | 0.0023 |
| <i>Fbxo43</i>       | F-box protein 43                                                              | -1.50 | 0.0092 |
| <i>Olr1251</i>      | olfactory receptor 1251                                                       | -1.50 | 0.0051 |
| <i>Trpv6</i>        | transient receptor potential cation channel, subfamily V, member 6            | -1.50 | 0.0002 |
| <i>Olr1029</i>      | olfactory receptor 1029                                                       | -1.50 | 0.0301 |
| <i>Creg2</i>        | cellular repressor of E1A-stimulated genes 2 [Source:RGD Symbol;Acc:1564056]  | -1.51 | 0.0039 |
| <i>Entpd7</i>       | ectonucleoside triphosphate diphosphohydrolase 7                              | -1.51 | 0.0018 |
| <i>Olr373</i>       | olfactory receptor 373                                                        | -1.51 | 0.0156 |
| <i>Cplx2</i>        | complexin 2                                                                   | -1.51 | 0.0146 |
| <i>Olr1143</i>      | olfactory receptor 1143                                                       | -1.51 | 0.0174 |
| <i>Olr77</i>        | olfactory receptor 77                                                         | -1.52 | 0.0166 |
| <i>Gpx1</i>         | glutathione peroxidase 1                                                      | -1.53 | 0.0496 |
| <i>Apmap</i>        | adipocyte plasma membrane associated protein                                  | -1.53 | 0.0105 |
| <i>Rdh11</i>        | retinol dehydrogenase 11 (all-trans/9-cis/11-cis)                             | -1.53 | 0.0183 |
| <i>Gpr155</i>       | G protein-coupled receptor 155                                                | -1.53 | 0.0052 |
| <i>Edem1</i>        | Protein Edem1                                                                 | -1.53 | 0.0106 |
| <i>Cttnbp2nl</i>    | CTTNBP2 N-terminal like                                                       | -1.54 | 0.0186 |
| <i>Defb10</i>       | defensin beta 10                                                              | -1.54 | 0.0101 |

|                     |                                                                                                                                                                                                     |       |        |
|---------------------|-----------------------------------------------------------------------------------------------------------------------------------------------------------------------------------------------------|-------|--------|
| <i>Pate3</i>        | prostate and testis expressed 3                                                                                                                                                                     | -1.54 | 0.0300 |
| <i>Kcnn4</i>        | potassium channel, calcium activated intermediate/small conductance subfamily N alpha, member 4                                                                                                     | -1.54 | 0.0123 |
| <i>Coa3</i>         | cytochrome C oxidase assembly factor 3                                                                                                                                                              | -1.54 | 0.0497 |
| <i>Rps29</i>        | ribosomal protein S29 [Source:RGD Symbol;Acc:3596]                                                                                                                                                  | -1.55 | 0.0259 |
| <i>LOC102553032</i> | ellis-van Creveld syndrome protein homolog                                                                                                                                                          | -1.56 | 0.0167 |
| <i>Lamb3</i>        | laminin, beta 3                                                                                                                                                                                     | -1.56 | 0.0255 |
| <i>Nrip2</i>        | nuclear receptor interacting protein 2                                                                                                                                                              | -1.56 | 0.0144 |
| <i>Tas2r140</i>     | taste receptor, type 2, member 140                                                                                                                                                                  | -1.57 | 0.0036 |
| <i>Ifi27</i>        | interferon, alpha-inducible protein 27                                                                                                                                                              | -1.57 | 0.0389 |
| <i>Gstk1</i>        | glutathione S-transferase kappa 1                                                                                                                                                                   | -1.57 | 0.0248 |
| <i>Zbtb26</i>       | zinc finger and BTB domain containing 26                                                                                                                                                            | -1.57 | 0.0359 |
| <i>LOC688842</i>    | hypothetical protein LOC688842                                                                                                                                                                      | -1.58 | 0.0317 |
| <i>Tm7sf2</i>       | transmembrane 7 superfamily member 2                                                                                                                                                                | -1.58 | 0.0402 |
| <i>Adssl1</i>       | Adenylosuccinate synthetase isozyme 1                                                                                                                                                               | -1.58 | 0.0152 |
| <i>Thoc6</i>        | THO complex 6                                                                                                                                                                                       | -1.58 | 0.0106 |
| <i>Slc26a7</i>      | solute carrier family 26 (anion exchanger), member 7                                                                                                                                                | -1.59 | 0.0042 |
| <i>Srek1ip1</i>     | SREK1-interacting protein 1                                                                                                                                                                         | -1.60 | 0.0191 |
| <i>Ankrd39</i>      | ankyrin repeat domain 39                                                                                                                                                                            | -1.60 | 0.0031 |
| <i>Hyal5</i>        | hyaluronoglucosaminidase 5                                                                                                                                                                          | -1.61 | 0.0002 |
| <i>Cyp26a1</i>      | cytochrome P450, family 26, subfamily a, polypeptide 1                                                                                                                                              | -1.63 | 0.0087 |
| <i>LOC500300</i>    | similar to hypothetical protein MGC6835                                                                                                                                                             | -1.64 | 0.0228 |
| <i>LOC102552988</i> | uncharacterized LOC102552988                                                                                                                                                                        | -1.64 | 0.0325 |
| <i>Hes6</i>         | hes family bHLH transcription factor 6                                                                                                                                                              | -1.65 | 0.0363 |
| <i>LOC100361139</i> | ENCODES a protein that exhibits actin binding (inferred) AND INVOLVED IN actin cytoskeleton organization (inferred) AND sequestering of actin monomers (inferred) AND FOUND IN cytoplasm (inferred) | -1.65 | 0.0210 |
| <i>Siglec1</i>      | sialic acid binding Ig-like lectin 1, sialoadhesin                                                                                                                                                  | -1.66 | 0.0404 |
| <i>Lrrcc1</i>       | leucine rich repeat and coiled-coil centrosomal protein 1                                                                                                                                           | -1.66 | 0.0287 |
| <i>Ppp1r3b</i>      | protein phosphatase 1, regulatory subunit 3B                                                                                                                                                        | -1.68 | 0.0323 |
| <i>RGD1559459</i>   | similar to Expressed sequence AI788959                                                                                                                                                              | -1.69 | 0.0116 |
| <i>Hebp2</i>        | heme binding protein 2                                                                                                                                                                              | -1.71 | 0.0283 |
| <i>Enpp5</i>        | ectonucleotide pyrophosphatase/phosphodiesterase 5                                                                                                                                                  | -1.72 | 0.0120 |
| <i>Map3k15</i>      | mitogen-activated protein kinase kinase kinase 15 [Source:RGD Symbol;Acc:1560603]                                                                                                                   | -1.73 | 0.0174 |
| <i>Gstt3</i>        | glutathione S-transferase, theta 3                                                                                                                                                                  | -1.74 | 0.0093 |
| <i>Aqp11</i>        | aquaporin 11                                                                                                                                                                                        | -1.76 | 0.0114 |
| <i>Ces4a</i>        | carboxylesterase 4A                                                                                                                                                                                 | -1.78 | 0.0082 |
| <i>Vom2r75</i>      | vomeroneasal 2 receptor, 75                                                                                                                                                                         | -1.86 | 0.0040 |
| <i>Trim24</i>       | transcription intermediary factor 1-alpha [Source:RefSeq peptide;Acc:NP_001037731]                                                                                                                  | -1.98 | 0.0428 |
| <i>Angptl8</i>      | angiopoietin-like 8                                                                                                                                                                                 | -2.19 | 0.0160 |

**Table S4** qPCR validation of microarray data for selected differentially expressed transcripts (FC > 1.3 or < -1.3,  $P < 0.05$ ) hepatic transcripts between the groups OC vs. LC.

| Gene symbol    | FC         |        | P-value    |         |
|----------------|------------|--------|------------|---------|
|                | OC vs. LC  |        | OC vs. LC  |         |
|                | Microarray | qPCR   | Microarray | qPCR    |
| <i>G6pd</i>    | 21.80      | 5.56   | <0.0001    | <0.0001 |
| <i>Scd2</i>    | 10.50      | 8.89   | 0.0053     | 0.0005  |
| <i>Elovl6</i>  | 9.49       | 7.17   | 0.0032     | 0.0001  |
| <i>Gpam</i>    | 8.64       | 7.77   | <0.0001    | 0.0001  |
| <i>Cd36</i>    | 8.42       | 11.93  | <0.0001    | 0.0037  |
| <i>Me1</i>     | 6.61       | 4.08   | 0.0006     | 0.0001  |
| <i>Fasn</i>    | 3.64       | 2.19   | 0.0051     | 0.0093  |
| <i>Srebf1</i>  | 2.36       | 1.28   | 0.0003     | 0.5101  |
| <i>Fads2</i>   | 2.07       | 1.64   | <0.0001    | 0.0327  |
| <i>Ldlr</i>    | 1.63       | 1.27   | 0.0268     | 0.2104  |
| <i>Elovl5</i>  | 1.62       | 1.52   | 0.0013     | 0.0220  |
| <i>Car3</i>    | -13.50     | -7.74  | 0.0001     | 0.0050  |
| <i>Dhrs7</i>   | -14.98     | -4.79  | <0.0001    | 0.0003  |
| <i>Sult1c3</i> | -16.33     | -6.34  | 0.0001     | <0.0001 |
| <i>Nrep</i>    | -16.95     | -7.52  | <0.0001    | 0.0033  |
| <i>Cyp3a18</i> | -20.66     | -7.81  | <0.0001    | <0.0001 |
| <i>Sds</i>     | -22.07     | -27.00 | 0.0108     | 0.0377  |
| <i>Cdh17</i>   | -59.12     | -71.54 | <0.0001    | 0.0054  |
| <i>Acnat2</i>  | -190.34    | -301.0 | <0.0001    | 0.0008  |

The microarray FC was calculated from n = 6 microarrays/group. The qPCR FC was calculated from n = 8 samples/group.

**Table S5**      **Characteristics of gene-specific primers used for qPCR analysis**

| Gene symbol     | Primer sequence                                   | NCBI GenBank | Annealing T | Product size (bp) |
|-----------------|---------------------------------------------------|--------------|-------------|-------------------|
| Reference genes |                                                   |              |             |                   |
| <i>Actb</i>     | GACCTCTATGCCAACACAGT<br>CACCAATCCACACAGAGTAC      | NM_031144    | 60          | 154               |
| <i>Atp5b</i>    | GCACCGTCAGAACTATTGCT<br>GAATTCAGGAGCCTCAGCAT      | NM_134364    | 57          | 203               |
| <i>Canx</i>     | CCAGATGCAGATCTGAAGAC<br>CTGGGTCCTCAATTTCACGT      | NM_172008    | 60          | 175               |
| Target genes    |                                                   |              |             |                   |
| <i>Acnat2</i>   | ACTTGCTCACCCCAAGATCC<br>CCCCTGACCCATGAAATTGGA     | NM_001014063 | 60          | 221               |
| <i>Car3</i>     | GGCCCTCTCTCTGGACCCTA<br>AATCCCATCGGGCTGCTTCA      | NM_019292    | 60          | 177               |
| <i>Cdh17</i>    | AGCAAGTATCTCCACGGCTG<br>GCCATATGCGCCAGTCAAAT      | NM_053977    | 60          | 152               |
| <i>Cd36</i>     | GCTGATTACTTCTGTGTAGTAGCTT<br>GCTCCAGTAATGAGCCCACA | NM_031561    | 60          | 242               |
| <i>Cyp3a18</i>  | CTGTCAGCTGGGAAGGAAACT<br>AAATTTCCACATGCCATCACCG   | NM_145782    | 60          | 232               |
| <i>Dhrs7</i>    | CTAGTCTTGGGGCTGCTGAG<br>TAGGTTGCCATTCTCCAGGC      | NM_001013098 | 60          | 249               |
| <i>Elovl5</i>   | ATGAACTGGGTTCCCTGCGG<br>GGAAGGGACAGAGGACAGGC      | NM_134382    | 60          | 102               |
| <i>Elovl6</i>   | AAGTTTGAAGTGCAGGAGCCG<br>CACCTAGTTCGGGTGCTTTGC    | NM_134383    | 60          | 211               |
| <i>Fads2</i>    | CATCGACCGCAAGGTCTACAAC<br>CTTGCCACGAAATCCAGGTC    | NM_031344    | 60          | 139               |
| <i>Fasn</i>     | AGGTGCTAGAGGCCCTGCTA<br>GTGCACAGACACCTTCCCAT      | NM_017332    | 60          | 281               |
| <i>Gpam</i>     | CAGCGTGATTGCTACCTGAA<br>CTCTCCGTCCTGGTGAGAAG      | NM_017274    | 60          | 194               |
| <i>G6pd</i>     | TTGTACCAGGGTGATGCCTTCC<br>GCTCACTCTGTTTGCGGATGTC  | NM_017006    | 60          | 199               |
| <i>Ldlr</i>     | ACAGTGTCTCCCAAGTCCAA<br>GCAAATGTGGATCTCGTCCTC     | NM_175762    | 60          | 222               |
| <i>Me1</i>      | CTGCCTTGGGGATTGCTCAT<br>GAGAGAAGCACGCCCTTA        | NM_012600    | 60          | 128               |
| <i>Nrep</i>     | GGAGGGAGGTCTTACTAAGGGA<br>GTAACCGATAGCTGGGGAGC    | NM_178096    | 60          | 130               |
| <i>Scd2</i>     | TGCACCCCCAGACACTTGTA<br>GGATGCATGGAAACGCCATAG     | NM_031841    | 60          | 94                |
| <i>Sds</i>      | CCGGCACTAGTGTGTTCCCTT<br>ACAGCCTTGTTTTGCCTTCATC   | NM_053962    | 60          | 104               |
| <i>Srebf1</i>   | TCTTGACCGACATCGAAGACAT<br>CCAGCATAGGGGGCATCAAA    | NM_001276707 | 60          | 85                |
| <i>Sult1c3</i>  | ACCTGTCAAGTCCCCATTCT<br>ATTCCTGCGTCCAGGTGGT       | NM_031732    | 60          | 217               |
